# Supplementary material for: Evaluation of a wearable wireless device with artificial intelligence, iThermonitor WT705, for continuous temperature monitoring for patients in surgical wards: a prospective comparative study
Source: PubMed Central journal article supplement — BMJ Open. 2020 Nov 18;10(11):e039474. doi: 10.1136/bmjopen-2020-039474 (PMC7677341; doi:10.1136/bmjopen-2020-039474), 2020-11-18

# BMJ Open

BMJ Open is committed to open peer review. As part of this commitment we make the peer review history of every article we publish publicly available.

When an article is published we post the peer reviewers' comments and the authors' responses online. We also post the versions of the paper that were used during peer review. These are the versions that the peer review comments apply to.

The versions of the paper that follow are the versions that were submitted during the peer review process. They are not the versions of record or the final published versions. They should not be cited or distributed as the published version of this manuscript.

BMJ Open is an open access journal and the full, final, typeset and author-corrected version of record of the manuscript is available on our site with no access controls, subscription charges or pay-per-view fees (<http://bmjopen.bmj.com>).

If you have any questions on BMJ Open's open peer review process please email [info.bmjopen@bmj.com](mailto:info.bmjopen@bmj.com)

# BMJ Open

## Evaluation of a wearable wireless continuous temperature monitoring device with artificial intelligence, iThermonitor®, for patients in surgical wards: a prospective comparative study

|                               |                                                                                                                                                                                                                                                                                                                                                                                                                                                                                                                                                                                                                          |
|-------------------------------|--------------------------------------------------------------------------------------------------------------------------------------------------------------------------------------------------------------------------------------------------------------------------------------------------------------------------------------------------------------------------------------------------------------------------------------------------------------------------------------------------------------------------------------------------------------------------------------------------------------------------|
| Journal:                      | <i>BMJ Open</i>                                                                                                                                                                                                                                                                                                                                                                                                                                                                                                                                                                                                          |
| Manuscript ID                 | bmjopen-2020-039474                                                                                                                                                                                                                                                                                                                                                                                                                                                                                                                                                                                                      |
| Article Type:                 | Original research                                                                                                                                                                                                                                                                                                                                                                                                                                                                                                                                                                                                        |
| Date Submitted by the Author: | 21-Apr-2020                                                                                                                                                                                                                                                                                                                                                                                                                                                                                                                                                                                                              |
| Complete List of Authors:     | Liu, Yuwei; Sichuan University West China Hospital, Department of general surgery<br>Liu, Changqing; Sichuan University West China Hospital, Operating room<br>Gao, Min; Sichuan University West China Hospital, Department of biliary surgery<br>Wang, Yan; Sichuan University West China Hospital, Department of biliary surgery<br>Bai, Yangjing; Sichuan University West China Hospital, Department of cardiac and macrovascular surgery<br>Gong, Renrong; Sichuan University West China Hospital, West China School of Nursing<br>Xu, Ruihua; Sichuan University West China Hospital, Department of biliary surgery |
| Keywords:                     | Health informatics < BIOTECHNOLOGY & BIOINFORMATICS, Adult surgery < SURGERY, Physiology < BASIC SCIENCES, Telemedicine < BIOTECHNOLOGY & BIOINFORMATICS                                                                                                                                                                                                                                                                                                                                                                                                                                                                 |
|                               |                                                                                                                                                                                                                                                                                                                                                                                                                                                                                                                                                                                                                          |

SCHOLARONE™  
Manuscripts

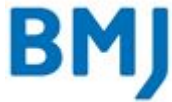

I, the Submitting Author has the right to grant and does grant on behalf of all authors of the Work (as defined in the below author licence), an exclusive licence and/or a non-exclusive licence for contributions from authors who are: i) UK Crown employees; ii) where BMJ has agreed a CC-BY licence shall apply, and/or iii) in accordance with the terms applicable for US Federal Government officers or employees acting as part of their official duties; on a worldwide, perpetual, irrevocable, royalty-free basis to BMJ Publishing Group Ltd ("BMJ") its licensees and where the relevant Journal is co-owned by BMJ to the co-owners of the Journal, to publish the Work in this journal and any other BMJ products and to exploit all rights, as set out in our [licence](#).

The Submitting Author accepts and understands that any supply made under these terms is made by BMJ to the Submitting Author unless you are acting as an employee on behalf of your employer or a postgraduate student of an affiliated institution which is paying any applicable article publishing charge ("APC") for Open Access articles. Where the Submitting Author wishes to make the Work available on an Open Access basis (and intends to pay the relevant APC), the terms of reuse of such Open Access shall be governed by a Creative Commons licence – details of these licences and which [Creative Commons](#) licence will apply to this Work are set out in our licence referred to above.

Other than as permitted in any relevant BMJ Author's Self Archiving Policies, I confirm this Work has not been accepted for publication elsewhere, is not being considered for publication elsewhere and does not duplicate material already published. I confirm all authors consent to publication of this Work and authorise the granting of this licence.

1  
2  
3  
4 **Evaluation of a wearable wireless continuous temperature**  
5  
6 **monitoring device with artificial intelligence, iThermonitor®, for**  
7  
8 **patients in surgical wards: a prospective comparative study**  
9  
10

11  
12  
13 Yuwei Liu<sup>a,b</sup>, Changqing Liu <sup>c</sup>, Min Gao <sup>d</sup>, Yan Wang <sup>d</sup>, Yangjing Bai <sup>e</sup>, Renrong  
14 Gong <sup>a,b,\*</sup>, Ruihua Xu <sup>c,\*</sup>  
15  
16

17  
18 <sup>a</sup> *Department of general surgery, West China Hospital of Sichuan University, Chengdu,*  
19 *P.R.China*  
20

21  
22 <sup>b</sup> *West China School of Nursing, Sichuan University, Chengdu, P.R.China*  
23

24  
25 <sup>c</sup> *Department of operating room, West China Hospital of Sichuan University, Chengdu,*  
26 *P.R.China*  
27

28  
29 <sup>d</sup> *Department of biliary surgery, West China Hospital of Sichuan University, Chengdu,*  
30 *P.R.China*  
31

32  
33 <sup>e</sup> *Department of cardiac and macrovascular surgery, West China Hospital of Sichuan*  
34 *University, Chengdu, P.R.China*  
35  
36

37  
38  
39 **Key words:** Monitoring, Physiologic; Body Temperature; Wearable Electronic  
40 Devices  
41  
42

43  
44  
45 **Word count:** 3795.  
46  
47  
48  
49  
50  
51  
52  
53  
54  
55

56  
57 

---

<sup>\*</sup> Corresponding authors at: No. 37 Guoxue Lane, Wuhou, Chengdu, Sichuan, China.

58 *E-mail address:* gongrenrong@wchscu.cn (R. Gong ), xuruihua@wchscu.cn (R. Xu )

59 *Tel:* Renrong Gong, 18980601527; Ruihua Xu, 18980601458  
60

## ABSTRACT

**Objectives:** To evaluate a new generation of wireless axillary thermometer, the iThermonitor®, and to ascertain its feasibility for perioperative continuous body temperature monitoring in surgical patients.

**Setting:** Department of biliary surgery, operating room and post anesthesia care unit of a tertiary university teaching hospital in Chengdu, China.

**Participants:** 526 adult surgical patients were consecutively enrolled.

**Design:** A prospective observational study. Axillary temperature was continuously recorded by a noninvasive wireless thermometer iThermonitor® (WT705, Raiing Medical, Beijing, China), throughout the whole perioperative period. Temperature of the contra lateral armpit was measured as reference with mercury thermometers at 8:00, 12:00, 16:00 and 20:00 every day.

**Outcome measures:** The primary outcomes were the accuracy and precision of iThermonitor®. Secondary outcomes were the validity of detecting fever and the feasibility of continuous wearing. Pairs of temperatures were evaluated by student *t*-test, Pearson's correlation and Bland-Altman plot.

**Results:** 3621 pairs of body temperatures were obtained. The temperatures measured by two methods agreed overall, with a mean difference of  $0.03^{\circ}\text{C}\pm 0.36^{\circ}\text{C}$  and a moderate correlation ( $r=0.755$ ,  $P<0.001$ ). The 95% limits of agreement ranged from  $-0.66^{\circ}\text{C}$  to  $0.72^{\circ}\text{C}$ , only 5.16% of the points were outside the 95% limits of agreement. The Intra-class correlation coefficient was 0.753. The continuous temperature monitoring captured more mild fevers than intermittent observation (117/526 vs.

1  
2  
3  
4 91/526,  $P = < 0.001$ ), detected fever up to 4.35 hours earlier, and captured higher peak  
5  
6 temperature ( $0.29^{\circ}\text{C} \pm 0.27^{\circ}\text{C}$ , 95%CI: 0.26-0.31). The sensitivity was 92.31% and  
7  
8 the specificity was 92.41% to detect fever. All subjects felt that wearing the  
9  
10 iThermonitor® was more or less comfortable.  
11  
12

13  
14 **Conclusions:** The iThermonitor® WT705 was sufficiently accurate and feasible for  
15  
16 continuous temperature monitoring in surgical patients. Dynamically reflecting the  
17  
18 individual trends of body temperature throughout the whole perioperative period  
19  
20 improves fever detection.  
21  
22  
23  
24  
25

### 26 **Strengths and limitations of this study**

- 27  
28  
29 ➤ A new generation of wireless dermal thermometer, iThermonitor®, was  
30  
31 sufficiently accurate for remote continuous monitoring in postsurgical patients.  
32  
33  
34 ➤ We highlighted the value of continuously monitoring body temperature (including  
35  
36 core temperature) covering the whole perioperative period, which could  
37  
38 dynamically reflect the individual trends of body temperature and improves fever  
39  
40 detection.  
41  
42  
43  
44 ➤ The main limitation is that we only compared the accuracy of iThermonitor® to  
45  
46 mercury thermometers in detecting axillary temperature. Adding a set of core  
47  
48 body temperature would help us better understand which devices are closer to the  
49  
50 core temperature when deviations occurs.  
51  
52  
53  
54  
55  
56  
57  
58  
59  
60

## INTRODUCTION

Body temperature is one of the most foundational vital signs of patients. Surgical patients are typically exposed to cold environments, administrations of unwarmed intravenous fluids, bacteria invasions, and anesthetic drugs which may impair the thermoregulatory system <sup>1</sup>, leading to perturbations of body temperature. Accurately monitoring the body temperature is essential to prevent hypothermia, detect infectious complications for surgical patients <sup>2,3</sup>.

No ideal device to measure body temperature has been found yet <sup>4</sup>, in terms of accuracy, availability, affordability, and ability of continuous monitoring across different clinical settings <sup>5</sup>. Peripheral thermometers measuring temperature from tympanic membrane, temporal artery, oral cavity, forehead or other parts are considered to be not stable and accurate enough <sup>6-8</sup>. Inserts of a temperature probe to esophageal, pulmonary artery, nasopharynx, rectum or bladder could precisely and continuously detect the core temperature <sup>9</sup>, but these invasive devices increased the risk of infection, and were only used for intensive care units patients and surgical patients under anesthesia when necessary <sup>10,11</sup>. Until today, there are still urgent needs of thermometers to accurately and continuously monitor body temperature in clinical practice.

Wearable technology is changing the way we measure body temperature and perform clinical care <sup>12</sup>. In recent years, several wireless dermal wearable thermometers increased the feasibility of continuous body temperature monitoring outside of the critical care setting <sup>13</sup>. However, only a small proportion of wearable

1  
2  
3  
4 devices have been CE marked (class II or above) or are FDA approved as medical  
5  
6 device <sup>14</sup>. The options that have enough convincing evidences to support their  
7  
8 accuracy for patients at risk for complications in a clinical environment are still few <sup>15</sup>.  
9  
10  
11 Wearable device that only reflecting the surface skin temperature has been proved  
12  
13 significant bias and poor correlation with oral temperature <sup>16</sup>. Zsuzsanna Balla et al. <sup>13</sup>  
14  
15 found seven wireless dermal thermometers reflecting core temperature through  
16  
17 internet searching, and tested four of them (only FeverSmart, iThermonitor®WT701,  
18  
19 Quest Temp Sitter, and Thermochron iButton were commercially available). The  
20  
21 results indicated that they were not reliable and accurate enough for most types of  
22  
23 clinical research, although the iThermonitor® WT701 systems had the least  
24  
25 unsatisfactory correlation to the rectal thermometer than other devices. Moreover,  
26  
27 surgical patients were typically transferred between multiple units of care (i.e.,  
28  
29 Surgical Wards, Operating Room, Post anesthesia Care Unit). Whether these devices  
30  
31 are capable of continuous temperature monitoring across different clinical scenarios  
32  
33 remains unclear, since maintain the accuracy has to deal with different challenges as  
34  
35 scenarios change. For instance, the tissue perfusion, physical activity, length of  
36  
37 wearing time and compliance differs from awake patients and those who under  
38  
39 anesthesia. Battery life and internal storage space also limited their application.  
40  
41  
42  
43  
44  
45  
46  
47  
48  
49

50  
51 A new generation of noninvasive wireless dermal thermometer, iThermonitor®  
52  
53 WT705, carried advanced versions of machine learning algorithms, may satisfy the  
54  
55 ambition of continuously monitoring the body temperature (including core  
56  
57 temperature) in different clinical settings. A previous version of iThermonitor® for  
58  
59  
60



1  
2  
3  
4 intraoperative monitoring has been reported well accuracy in representing core body  
5  
6 temperature (distal esophagus temperature) from the axilla in patients under  
7  
8 anesthesia <sup>17</sup>. However, the performances of version for ward/home have not been  
9  
10 tested before. Therefore, we conducted a prospective study to assess the accuracy and  
11  
12 feasibility of iThermonitor® WT705 in awake patients in surgical wards, and its  
13  
14 potential for continuous monitoring of body temperature throughout the whole  
15  
16 perioperative period at real clinical settings.  
17  
18  
19  
20  
21  
22  
23  
24

## 25 **METHODS**

### 26 **Study design, subjects, and setting**

27  
28 A prospective comparative descriptive study was planned to evaluate the axillary  
29  
30 wireless sensor iThermonitor® for continuous temperature monitoring by comparing  
31  
32 it to mercury-contained thermometers. Patients admitted to the department of biliary  
33  
34 surgery in West China Hospital of Sichuan University were consecutively recruited in  
35  
36 this study, from August to December, 2019. The inclusion criteria was only that the  
37  
38 patient signed the informed consent. Patients with any impediment to attach the  
39  
40 temperature sensor iThermonitor® under their axillary were excluded. Finally, 526  
41  
42 patients were enrolled and all of them signed their informed written consent. The  
43  
44 room temperature was between 22°C and 26°C.  
45  
46  
47  
48  
49  
50  
51  
52

### 53 **Instruments**

54  
55 The study instruments were: (1) Wireless noninvasive dermal thermometer  
56  
57 iThermonitor® (model WT705, Raiing Medical Company, Beijing, China), with  
58  
59  
60

1  
2  
3  
4 accuracy of  $\pm 0.1^{\circ}\text{C}$  ( $5^{\circ}\text{C}$ - $40^{\circ}\text{C}$ ). This is a battery-operated reusable electronic  
5  
6 device with 30 days of battery life. The price is also sufficiently affordable for single  
7  
8 patient use, as executed in our study. The US Food and Drug Administration  
9  
10 approved it as a class II medical device. The iThermonitor® would be securely  
11  
12 attached to the axilla (shaved if necessary) of patients with adhesive tape provided by  
13  
14 manufacturer. The sensor would record the axillary temperature once every 4 seconds,  
15  
16 then output the temperature every minute after calculation. The iThermonitor®  
17  
18 WT705 is an updated version that equipped with a more powerful chip carrying two  
19  
20 versions of patented machine learning algorithms to maintain the accuracy both in the  
21  
22 operating room and ward/home. The version for operating room use would gauge the  
23  
24 core temperature from axilla, after correcting changes in tissue perfusion caused by  
25  
26 anesthetics. Another version for ward/home use tested in our study would reflect the  
27  
28 axillary temperature itself (to adapt to clinical decision-making habits), after  
29  
30 adjustment for daily activities, body posture changes, adhesive tapes loose and a more  
31  
32 variable ambient temperature. The algorithms and the data output frequency can be  
33  
34 pre-set as needed. The temperature data with time and scenario stamps would be  
35  
36 transmitted wirelessly via Bluetooth or WiFi to the central computer that installed in  
37  
38 the nurse station. The dynamic temperature curves of all patients were visualized on  
39  
40 the screen. All the iThermonitor® sensors were proofreaded for accuracy according to  
41  
42 the manufacturer's standard before use. (2) Mercury thermometers, with accuracy of  
43  
44  $\pm 0.1^{\circ}\text{C}$ , over the range of  $35^{\circ}\text{C}$  -  $42^{\circ}\text{C}$ . Mercury thermometers would be calibrated  
45  
46 per week by comparing to a high-precision industrial mercury thermometer as the  
47  
48  
49  
50  
51  
52  
53  
54  
55  
56  
57  
58  
59  
60

1  
2  
3  
4 standard within the same constant temperature water tank. Mercury thermometers  
5  
6 with temperature deviations greater than 0.2°C would not be used. We chose the  
7  
8 mercury thermometer as reference because it was the most robust device in reflecting  
9  
10 axillary temperature<sup>18</sup>. We also want to know whether the iThermonitor® could be an  
11  
12 ideal substitute choice for mercury thermometer, which may have implications for  
13  
14 countries looking for alternative methods to mercury thermometers.  
15  
16  
17  
18

### 19 **Data collection**

20  
21  
22 Demographics, age, sex and BMI were extracted from the medical records. The  
23  
24 iThermonitor® sensor would be attached to the dried and cleaned skin in the armpit  
25  
26 region from the first day of admission, then continuously recorded the body  
27  
28 temperature throughout the whole perioperative period until discharge. Patients were  
29  
30 instructed to keep wearing it, except for a CT scan or a shower. A nurse checked the  
31  
32 skin of axillary everyday to assess whether the patient had local skin allergy or other  
33  
34 adverse reactions. We also observed the compliance of patients wearing the  
35  
36 iThermonitor® sensor. Patients were asked to complete a questionnaire with a scale  
37  
38 from 0 to 5 to evaluate the tolerability of iThermonitor® on the day of discharge.  
39  
40  
41  
42  
43  
44

45  
46 The mercury thermometer would be kept under the patient's other armpit for 10  
47  
48 minutes after cleaned and dried, at specific time intervals at 8:00AM, 12:00AM,  
49  
50 16:00PM and 20:00PM every day. Two specially trained nurses were assigned to  
51  
52 measure the temperature. One nurse recorded the actual time for reading the mercury  
53  
54 thermometer (accurate to minutes), then another nurse checked the wireless  
55  
56 temperature of the patients at the same time from the central monitoring station. If the  
57  
58  
59  
60

1  
2  
3  
4 difference between the concurrent temperature measured by the two devices was over  
5  
6 than 1°C, the measurement would be repeated immediately with a mercury  
7  
8 thermometer, and whether the iThermonitor® was correctly wore would be checked.  
9  
10  
11 If there was a confirmed error due to improper measurement, this set of data would be  
12  
13 excluded. If we confirmed that the difference was really exists, this set of data would  
14  
15 be taken into analysis. We also assigned a nurse to ensure the continuity of  
16  
17 temperature monitoring in the operating room (OR) and post anesthesia care unit  
18  
19 (PACU).  
20  
21  
22  
23

### 24 **Main end points**

25  
26  
27 The following endpoints are evaluated:

28  
29 - Accuracy. The accuracy was indicated by the mean of the difference (also  
30  
31 called bias) and the standard deviation, as calculated by temperature recorded by  
32  
33 iThermonitor® minus that of mercury thermometers. A priori, an absolute difference  
34  
35 of 0.5°C was considered as clinically acceptable<sup>17 19</sup>.

36  
37  
38 - Precision. Precision (also called reliability) was indicated by the 95% limits of  
39  
40 agreement and Intra-class correlation coefficient. An ICC greater than 0.7 would be  
41  
42 considered as well accepted agreement between the two temperature measurement  
43  
44 methods.  
45

46  
47 - Validity. Validity was evaluated by the sensitivity and specificity in detecting  
48  
49 fever. Axillary temperature of 38°C was considered as a cut-off value of fever<sup>7</sup>. We  
50  
51 also compared the peak temperature recorded by the two methods, and the time of  
52  
53 fever detected. For the iThermonitor®, when the body temperature exceeded 38°C  
54  
55 (lasting at least 5 minutes) for the first time, the moment would be compared to the  
56  
57 time that fever first detected by mercury thermometers.  
58  
59  
60

1  
2  
3 - Feasibility. The feasibility of continuous temperature monitoring was assessed  
4 with comfort score and possible adverse events. The comfort score ranked from 0 to 5,  
5 with 0 meaning most uncomfortable and intolerable, 5 meaning very comfortable.  
6  
7 Any adverse event, such as skin blisters or ulcer caused by iThermonitor®, or  
8 breakages of mercury thermometers, would be recorded.  
9  
10  
11  
12  
13  
14

### 15 **Statistics**

16  
17 Data were analyzed by Python (Version 3.5.1) and MedCalc (Version 19.1.3)  
18 software. Mean and standard deviations of temperature were calculated for  
19 iThermonitor® and mercury thermometers. The student *t*-test was utilized for paired  
20 samples. Pearson's correlation analysis and Bland-Altman plot were used to evaluate  
21 the relationship between the two sets of temperatures.  $P < 0.05$  was considered as  
22 statistically significant.  
23  
24  
25  
26  
27  
28  
29  
30  
31  
32

### 33 **Sample Size Considerations**

34  
35 The sample size module for Bland-Altman plot of MedCalc software was conducted.  
36  
37 We expected the mean of differences was 0.03°C, with a standard deviation of 0.23°C,  
38 according to our previous pilot study. This calculation set a maximum allowed  
39 difference of 0.5°C, a type I error rate (Alpha) of 0.05, and a power of 80%. Finally  
40  
41 3292 pairs of data were deemed sufficient to adequately detect a difference between  
42 the iThermonitor® and mercury thermometer.  
43  
44  
45  
46  
47  
48  
49  
50

### 51 **Patient and public involvement**

52  
53 No patients or members of the public were involved in the design of this study, in the  
54 implementation of the study or in result dissemination.  
55  
56  
57  
58  
59  
60

## RESULTS

### Characteristics of the patients

We enrolled 526 patients. All of them completed the study and were included in the final analysis, no missing values need to be processed. Temperature curves with time stamps across different clinical scenarios were recorded for each patient. [Figure 1](#) shows the example of a patient measurement. Among the 526 patients, there were 197 (37.5%) males and 329 (62.5%) females, with an average age of  $53.52 \pm 14.20$  years (over the range 15-86 years). The cumulative monitoring duration was 1768 days, with an average of  $5.57 \pm 3.62$  days for each patient. Demographic characteristics are shown in [Table 1](#).

**Figure 1.** Example of a patient's temperature curve with time stamps across different clinical scenarios

**Table 1.** Characteristics of the patients (n=526)

| Variable                           | Summary                        |
|------------------------------------|--------------------------------|
| Age (years)                        | $53.85 \pm 14.20$ (15-86)      |
| Gender                             |                                |
| Male (%)                           | 197(37.5%)                     |
| Female (%)                         | 329(62.5%)                     |
| BMI (kg/m <sup>2</sup> )           | $23.03 \pm 3.12$ (15.21-37.78) |
| Average monitor duration (days)    | $5.57 \pm 3.62$ (1-22)         |
| Cumulative monitor duration (days) | 1768                           |

Data are presented as n (%) of patients, or mean $\pm$ SD (range) for continuous variables.

Abbreviation: BMI, body mass index.

### Precision

1  
2  
3  
4 A total of 3621 pairs of body temperatures were obtained. A scatter plot shows a  
5  
6 relatively strong linear correlation ( $r = 0.755$ ,  $P < 0.001$ ) between the two groups of  
7  
8 temperature (Appendix figure-A). The Bland-Altman plot shows that the 95% limits  
9  
10 of agreement were relatively narrow, with the upper limit at  $0.72\text{ }^{\circ}\text{C}$ , and the lower  
11  
12 limit at  $-0.66\text{ }^{\circ}\text{C}$ , only 5.16% (187/3621) of the points were outside the 95% limits of  
13  
14 agreement (Figure 2). The intra-group correlation coefficient (ICC) was 0.753,  
15  
16 indicating that the temperatures measured by the two methods were well agreed  
17  
18 overall.  
19  
20  
21  
22  
23  
24  
25  
26

27 **Figure 2.** Bland-Altman plot of iThermonitor® axillary temperatures against mercury  
28  
29 thermometer temperatures. ICC=0.753, 95% limits of agreement from  $-0.66\text{ }^{\circ}\text{C}$  to  $0.72\text{ }^{\circ}\text{C}$ ,  
30  
31 only 5.16% of the points were outside the 95% limits of agreement.  
32  
33

### 34 Accuracy

35  
36 As showing in Table 2, the mean iThermonitor® temperature was  $36.61\text{ }^{\circ}\text{C} \pm 0.49\text{ }^{\circ}\text{C}$ ,  
37  
38 ranged from  $34.8\text{ }^{\circ}\text{C}$  to  $39.6\text{ }^{\circ}\text{C}$ , while the mean temperature measured by mercury  
39  
40 thermometers was  $36.58\text{ }^{\circ}\text{C} \pm 0.52\text{ }^{\circ}\text{C}$ , ranged from  $35.0\text{ }^{\circ}\text{C}$  to  $39.9\text{ }^{\circ}\text{C}$ . The mean of  
41  
42 difference (bias) was  $0.031 \pm 0.353\text{ }^{\circ}\text{C}$ , ranged from  $-1.40\text{ }^{\circ}\text{C}$  to  $1.80\text{ }^{\circ}\text{C}$ . The bias within  
43  
44  $\pm 0.5\text{ }^{\circ}\text{C}$  were accounted for 87.68%, while 99.17% were within  $\pm 1.0\text{ }^{\circ}\text{C}$ . According to  
45  
46 the temperatures measured by the mercury thermometers, we divided the patient's  
47  
48 body temperature into three adjacent intervals: hypothermia (less than  $36.0\text{ }^{\circ}\text{C}$ ),  
49  
50 normal body temperature ( $36.0\text{ }^{\circ}\text{C}$  -  $37.9\text{ }^{\circ}\text{C}$ ), and fever ( $\geq 38.0\text{ }^{\circ}\text{C}$ ). The bias was the  
51  
52 smallest ( $0.006\text{ }^{\circ}\text{C} \pm 0.332\text{ }^{\circ}\text{C}$ , 95%CI:  $-0.006$ ,  $0.017$ ) within the normal temperature  
53  
54 range, whereas the largest bias ( $0.380\text{ }^{\circ}\text{C} \pm 0.398\text{ }^{\circ}\text{C}$ ) existed when the temperature is  
55  
56  
57  
58  
59  
60

below 36°C. Although the differences in partial intervals were statistically significant, the bias of all intervals were within 0.5°C, the clinically acceptable standard defined a priori.

**Table 2** Comparisons of temperatures measured by iThermonitor® and mercury thermometers in different intervals.

| Range       | Pairs of temperature | iThermonitor® (°C) | Mercury Thermometer (°C) | Bias (°C)*   | 95%CI of Bias |        | <i>t</i> | <i>P</i> # |
|-------------|----------------------|--------------------|--------------------------|--------------|---------------|--------|----------|------------|
|             |                      |                    |                          |              | Lower         | Upper  |          |            |
| < 36.0°C    | 275                  | 36.09±0.40         | 35.71±0.18               | 0.380±0.398  | 0.333         | 0.428  | 15.839   | < 0.001    |
| 36.0-37.9°C | 3285                 | 36.629±0.421       | 36.624±0.416             | 0.006±0.332  | -0.006        | 0.017  | 0.971    | 0.332      |
| ≥38.0°C     | 61                   | 38.11±0.54         | 38.27±0.36               | -0.165±0.351 | -0.255        | -0.076 | -3.682   | < 0.001    |
| Total       | 3621                 | 36.61±0.49         | 36.58±0.52               | 0.031±0.353  | 0.020         | 0.043  | 5.326    | < 0.001    |

Temperature intervals were divided according to the temperatures measured by mercury thermometers. Bias were calculated by iThermonitor® temperature minus mercury thermometer temperature. Data presented as mean±SD. *P* values were obtained by Student's *t* tests for paired samples, since bias were normally distributed.

### Comparison of the two methods in detecting fever

Among 526 patients enrolled, 84 patients were simultaneously detected fever by two methods. However, 33 patients with body temperature slightly higher than 38°C were only detected by the iThermonitor® during our observation period, suggesting that continuous temperature monitoring could capture more mild fevers than intermittent observation. The sensitivity was 92.31% and the specificity was 92.41% to detect fever, indicating a relatively strong consistency of the two methods (Kappa=0.761, *P* < 0.001).



**Table 3** Consistency of iThermonitor® and mercury thermometer in the diagnosis of fever

|                   |                        | Mercury Thermometers |                        | Total | Kappa | P             |
|-------------------|------------------------|----------------------|------------------------|-------|-------|---------------|
|                   |                        | Patients With Fever  | Patients Without fever |       |       |               |
| iTherm<br>onitor® | Patients With Fever    | 84                   | 33                     | 117   | 0.761 | $P^1 < 0.001$ |
|                   | Patients Without fever | 7                    | 402                    | 409   | -     | $P^2 < 0.001$ |
|                   | Total                  | 91                   | 435                    | 526   |       |               |

A patient with body temperature  $\geq 38^\circ\text{C}$  during the perioperative period was considered as 1 case of fever.  $P^1$  was obtained by Kappa consistency test, indicating the existence of consistency.  $P^2$  was obtained by paired chi-square test, indicating that there was significant difference between the two methods in detecting fever.

### Comparison of average peak temperature

The average peak temperature captured by intermittent measurement with mercury thermometers was  $37.26^\circ\text{C} \pm 0.56^\circ\text{C}$ , whereas the continuous monitoring with iThermonitor® detected higher peak temperature of  $37.55^\circ\text{C} \pm 0.59^\circ\text{C}$ . A mild but statistically significant difference of  $0.29^\circ\text{C} \pm 0.27^\circ\text{C}$  (range:  $-0.45^\circ\text{C}$ -  $1.26^\circ\text{C}$ , 95%CI:  $0.26^\circ\text{C}$ - $0.31^\circ\text{C}$ ) was noted between the peak temperatures recorded by the two methods (Figure 3).

**Figure 3.** Peak temperature recorded by iThermonitor® and mercury thermometer.

### Comparison of the earliest time of fever detected

The continuous monitoring with iThermonitor® detected fever earlier than intermittent measurement with mercury thermometers. A mean time interval of 4.35 hours was observed, with a minimum difference of -0.92 hours and maximum

1  
2  
3  
4 difference of 25.34 hours.  
5  
6

### 7 **Feasibility of continuous temperature monitoring**

8  
9 During 1768 monitoring days, 4.37% (23/526) of the patients complained of slight  
10 itching during the wearing period. Local skin redness was observed in two patients  
11 and then lessened after we changed the iThermonitor® to the contra lateral axilla. In  
12 terms of comfort, 109 of the first enrolled patients rated the comfort score. Sum to 21  
13 patients ranked as 2, 81 patients ranked as 3, 6 patients ranked as 4 and 1 patients  
14 ranked as 5. All subjects felt that wearing the iThermonitor® were more or less  
15 comfortable and did not affect daily activities, indicating a well acceptable  
16 compliance of the iThermonitor®.  
17  
18  
19  
20  
21  
22  
23  
24  
25  
26  
27  
28  
29  
30  
31  
32

## 33 **DISCUSSION**

34  
35 We conducted a prospective study to evaluate the performance of wireless dermal  
36 temperature sensor, iThermonitor® WT705, for continuous temperature monitoring in  
37 surgical patients. We choose iThermonitor® because it was one of the best performed  
38 devices due to relatively high sensitivity and robustness in reflecting core temperature  
39 than other available wireless dermal thermometers <sup>13</sup>.  
40  
41  
42  
43  
44  
45  
46  
47

### 48 **Principal Findings in precision**

49  
50 In our study, the algorithms were pre-setted for ward/home use. The results showed a  
51 small bias ( $0.03^{\circ}\text{C}\pm 0.35^{\circ}\text{C}$ ), moderate correlation and relatively narrow 95% limits of  
52 agreement between the axillary temperatures recorded by iThermonitor® and mercury  
53 thermometers. The mean of difference didn't vary much at different temperature  
54  
55  
56  
57  
58  
59  
60

1  
2  
3  
4 intervals, except when the temperatures measured by mercury thermometers were  
5  
6 below 36°C. At this interval, the iThermonitor® temperatures were higher and  
7  
8 showed the largest bias ( $0.380^{\circ}\text{C}\pm 0.398^{\circ}\text{C}$ ), much more than other temperature  
9  
10 intervals. One of the possible explanations might be that the mercury thermometers  
11  
12 could not be accurate enough in reflecting low body temperatures when the patient  
13  
14 did not maintain the best measurement posture for enough time. Overall, such  
15  
16 difference was considered to be acceptable, as defined a priori, the iThermonitor®  
17  
18 appears accurate and precise enough for clinical use.  
19  
20  
21  
22  
23

### 24 **Compared To Similar Studies**

25  
26 Different reference standards and algorithm versions resulted in inconsistent accuracy  
27  
28 of iThermonitor® in previous reports. Pei et al.<sup>17</sup> tested the intraoperative version of  
29  
30 iThermonitor® WT701, the axillary temperature recordings well represents core  
31  
32 temperature in adults under anesthesia, with a mean difference of only  $0.14^{\circ}\text{C}\pm 0.26^{\circ}\text{C}$   
33  
34 (esophageal minus axillary) and 95% limits of agreement from  $-0.38^{\circ}\text{C}$  to  $0.66^{\circ}\text{C}$ .  
35  
36 Our work adds evidence to support the applicability of iThermonitor® in surgical  
37  
38 wards, as a continuation or extension of intraoperative core temperature monitoring.  
39  
40 As to the version for ward and home, it was reported that the iThermonitor® WT701  
41  
42 rendered a lower average temperature than rectal temperature (bias  $-0.77^{\circ}\text{C}\pm 0.53^{\circ}\text{C}$ )  
43  
44  
45  
46  
47  
48  
49  
50  
51  
52  
53  
54  
55  
56  
57  
58  
59  
60  
13. Our study showed the iThermonitor® WT705 was better at reflecting axillary  
temperature than rectal temperature. This was sufficiently reasonable, since the  
algorithms for ward/home were originally established for reflecting axillary  
temperature in consideration of clinical habits. Comparisons to rectal temperature

1  
2  
3  
4 were actually inappropriate. Even though the axillary temperature was not recognized  
5  
6 as core temperature, it was adequate for guiding clinical decision in general wards.  
7  
8

9 As to the feasibility, all subjects in our study felt that wearing the iThermonitor®  
10  
11 were more or less comfortable and did not affect daily activities. The iThermonitor®  
12  
13 also showed highly easy to use for continuous monitoring children` body temperature  
14  
15 at home <sup>20</sup>. It indicates that the iThermonitor® also had the potential to provide  
16  
17 continuous temperature monitoring for patients after discharge.  
18  
19  
20  
21

## 22 **Clinical Implications**

23  
24 The advantages and feasibility of continuous vital signs monitoring in general wards  
25  
26 are attracting increasing attention <sup>10 21</sup>. As claimed by previous study, the  
27  
28 iThermonitor® was marginally superior in following the individual trends than in  
29  
30 assessing absolute temperatures <sup>13</sup>. We further demonstrated that continuous  
31  
32 temperature monitoring was better at capturing the peak of fever, and could detect  
33  
34 fever 4.35 hours earlier than intermittent temperature monitoring. This finding may  
35  
36 have important therapeutic implications. Dakappa et al. <sup>11</sup> also noted higher peak  
37  
38 temperature using continuous tympanic temperature recording device (TherCom®)  
39  
40 than using conventional recording of temperature, with a significant difference of  
41  
42 1.52°C. Another research reported 180 minutes earlier by wearable digital  
43  
44 thermometers (TremTraq, with a battery life of 72 hours) to detect increases in body  
45  
46 temperature than by standard monitoring <sup>21</sup>. Furthermore, maintaining the continuity  
47  
48 of the body temperature monitoring process across different clinical scenarios enable  
49  
50 us to install a real world database of the patient's perioperative body temperature,  
51  
52  
53  
54  
55  
56  
57  
58  
59  
60

1  
2  
3  
4 which would bring us more findings in exploring the regularity of perioperative  
5  
6 temperature fluctuation.  
7

8  
9 The mercury-containing thermometer has been widely used for hundreds of years  
10  
11 because of its stable performances in reflecting temperature <sup>18</sup>. However, these glass  
12  
13 based thermometers are fragile to leak mercury out, which is one of the top ten  
14  
15 chemicals of major public health concern <sup>22</sup>. Although the World Health Organization  
16  
17 has called for the phase out of mercury fever thermometers by 2020 <sup>22</sup>, they are still  
18  
19 widely used in many countries <sup>5 23 24</sup>. Gaps are evident in practices on promoting  
20  
21 mercury-free thermometers. The lack of an ideal alternative device for temperature  
22  
23 measurement maybe the main reason. Using iThermonitor® instead of mercury  
24  
25 thermometers to reduce medical mercury emissions are beneficial to the patients,  
26  
27 health personnel and public health <sup>23 24</sup>.  
28  
29  
30  
31  
32  
33

### 34 35 **Limitations** 36

37  
38 Our study has several limitations. First, we only compared the iThermonitor® to  
39  
40 mercury thermometers in detecting axillary temperature. Adding a set of core body  
41  
42 temperatures as the gold standard would help us better understand which devices are  
43  
44 closer to the core temperature when deviations occurs. Second, we only repeated the  
45  
46 measurement when the bias were over than 1°C. A more strict supervision of  
47  
48 repeating the measurement when the temperature recorded by mercury thermometers  
49  
50 are below 36°C, may improve the performance. Third, we did not consider whether  
51  
52 there is a difference in armpit temperature between dominant and non-dominant arm.  
53  
54  
55  
56  
57  
58 However, publication did not show that such differences existed <sup>25</sup>.  
59  
60

## CONCLUSIONS

The iThermonitor® WT705 was sufficiently accurate and feasible for continuous temperature monitoring in surgical patients. Dynamically reflecting the individual trends of body temperature throughout the whole perioperative period can help us better detect fever and may promote early warning of perioperative complications.

**Contributors** Yuwei Liu has participated in the conception, statistical analysis and written the manuscript. Changqing Liu was in charge of body temperature management in the OR and PACU. Min Gao and Yan Wang performed temperature measurement. Yangjing Bai participated in the design of the study. Renrong Gong conceived the study and reviewed & edited the manuscript. Ruihua Xu administrated the project. All authors read and approved the manuscript.

**Funding** This study was funded by the Sichuan University West China Nursing Discipline Development Special Fund Project (NO.HXHL19031).

**Competing interest** None declared.

**Ethics approval** Ethical approval was obtained from the Biomedical Research Ethics Committee of West China Hospital of Sichuan University (No. 2019-447).

**Clinical trial registration** The study was registered at Chinese Clinical Trail Registry (ChiCTR1900024549) on July 5, 2019. The full study protocol can be accessed at: [www.chictr.org.cn](http://www.chictr.org.cn).

**Data sharing statement** Data are available upon reasonable request.

**Open access** This is an open access article distributed in accordance with the Creative Commons Attribution Non Commercial (CC BY-NC 4.0) license, which permits others to distribute, remix, adapt, build upon this work non-commercially, and license their derivative works on different terms, provided the original work is properly cited, appropriate credit is given, any changes made indicated, and the use is non-commercial. See: <http://creativecommons.org/licenses/by-nc/4.0/>

## REFERENCES

1. Sessler DI. Opioids and postoperative shivering. *J Clin Anesth* 2016;31:42-43.
2. Middleton S, McElduff P, Drury P, et al. Vital sign monitoring following stroke associated with 90-day independence: A secondary analysis of the QASC cluster randomized trial. *Int J Nurs Stud* 2019;89:72-79.
3. Larach MG, Brandom BW, Allen GC, et al. Malignant Hyperthermia Deaths Related to Inadequate Temperature Monitoring, 2007–2012. *Anesthesia & Analgesia* 2014;119(6):1359-66.
4. Sollai S, Dani C, Berti E, et al. Performance of a non-contact infrared thermometer in healthy newborns. *BMJ Open* 2016;6(3):e008695.
5. Halder N, Peshin SS, Pandey RM, et al. Awareness assessment of harmful effects of mercury in a health care set-up in India: A survey-based study. *Toxicol Ind Health* 2015;31(12):1144-51.
6. Opersteny E, Anderson H, Bates J, et al. Precision, Sensitivity and Patient Preference of Non-Invasive Thermometers in a Pediatric Surgical Acute Care Setting. *J Pediatr Nurs* 2017;35:36-41.
7. Niven DJ, Gaudet JE, Laupland KB, et al. Accuracy of Peripheral Thermometers for Estimating Temperature. *Annals of Internal Medicine* 2015;163(10)
8. Geijer H, Udumyan R, Lohse G, et al. Temperature measurements with a temporal scanner: systematic review and meta-analysis. *BMJ Open* 2016;6(3):e009509.
9. Calonder EM, Sendelbach S, Hodges JS, et al. Temperature Measurement in Patients Undergoing Colorectal Surgery and Gynecology Surgery: A Comparison of Esophageal Core, Temporal Artery, and Oral Methods. *Journal of PeriAnesthesia Nursing* 2010;25(2):71-78.
10. Downey CL, Chapman S, Randell R, et al. The impact of continuous versus intermittent vital signs monitoring in hospitals: A systematic review and narrative synthesis. *Int J Nurs Stud* 2018;84:19-27.
11. Dakappa PH, Bhat GK, Bolumbu G, et al. Comparison of Conventional Mercury Thermometer and Continuous TherCom((R)) Temperature Recording in Hospitalized Patients. *J Clin Diagn Res* 2016;10(9):OC43-OC46.
12. Liao Y, Thompson C, Peterson S, et al. The Future of Wearable Technologies and Remote Monitoring in Health Care. *Am Soc Clin Oncol Educ Book* 2019;39:115-21.
13. Zsuzsanna Balla H, Theodorsson E, Strom JO. Evaluation of commercial, wireless dermal thermometers for surrogate measurements of core temperature. *Scand J Clin Lab Invest* 2019;79(1-2):1-6.
14. Muzny M, Henriksen A, Giordanengo A, et al. Wearable sensors with possibilities for data exchange: Analyzing status and needs of different actors in mobile health monitoring systems. *Int J Med Inform* 2020;133:104017.
15. Breteler MJMM, Huizinga E, van Loon K, et al. Reliability of wireless monitoring using a wearable patch sensor in high-risk surgical patients at a step-down unit in the Netherlands: a clinical validation study. *BMJ Open* 2018;8(2):e020162.
16. Izmailova ES, McLean IL, Bhatia G, et al. Evaluation of Wearable Digital Devices in a Phase I Clinical Trial. *Clin Transl Sci* 2019;12(3):247-56.
17. Pei L, Huang Y, Mao G, et al. Axillary Temperature, as Recorded by the iThermonitor

- 1  
2  
3 WT701, Well Represents Core Temperature in Adults Having Noncardiac Surgery. *Anesth*  
4 *Analg* 2018;126(3):833-38.  
5  
6 18. Wright WF, Mackowiak PA. Origin, Evolution and Clinical Application of the  
7 Thermometer. *Am J Med Sci* 2016;351(5):526-34.  
8  
9 19. Lu SH, Dai YT, Yen CJ. The effects of measurement site and ambient temperature on  
10 body temperature values in healthy older adults: a cross-sectional comparative study. *Int J*  
11 *Nurs Stud* 2009;46(11):1415-22.  
12  
13 20. Kakarmath SS, de Redon E, Centi AJ, et al. Assessing the Usability of an Automated  
14 Continuous Temperature Monitoring Device (iThermonitor) in Pediatric Patients:  
15 Non-Randomized Pilot Study. *JMIR Pediatr Parent* 2018;1(2):e10804.  
16  
17 21. Abbasi J. Wearable Digital Thermometer Improves Fever Detection. *JAMA*  
18 2017;318(6):510.  
19  
20 22. WHO calls for the phase out of mercury fever thermometers and blood pressure measuring  
21 devices by 2020. Available at:  
22 [https://www.who.int/news-room/detail/11-10-2013-who-calls-for-the-phase-out-of-mercur](https://www.who.int/news-room/detail/11-10-2013-who-calls-for-the-phase-out-of-mercury-fever-thermometers-and-blood-pressure-measuring-devices-by-2020)  
23 [y-fever-thermometers-and-blood-pressure-measuring-devices-by-2020](https://www.who.int/news-room/detail/11-10-2013-who-calls-for-the-phase-out-of-mercury-fever-thermometers-and-blood-pressure-measuring-devices-by-2020) [accessed 11  
24 October 2013].  
25  
26 23. Li P, Yang Y, Xiong W. Impacts of Mercury Pollution Controls on Atmospheric Mercury  
27 Concentration and Occupational Mercury Exposure in a Hospital. *Biol Trace Elem Res*  
28 2015;168(2):330-4.  
29  
30 24. Chadli-Debbiche A, Allani R, Jouini R, et al. Mercurial hospital waste: management,  
31 becoming and recommendations. *Tunis Med* 2018;96(5):273-80.  
32  
33 25. Rubia-Rubia J, Arias A, Sierra A, et al. Measurement of body temperature in adult  
34 patients: comparative study of accuracy, reliability and validity of different devices. *Int J*  
35 *Nurs Stud* 2011;48(7):872-80.  
36  
37  
38  
39  
40  
41  
42  
43  
44  
45  
46  
47  
48  
49  
50  
51  
52  
53  
54  
55  
56  
57  
58  
59  
60



1  
2  
3  
4  
5  
6  
7  
8  
9  
10  
11  
12  
13  
14  
15  
16  
17  
18  
19  
20  
21  
22  
23  
24  
25  
26  
27  
28  
29  
30  
31  
32  
33  
34  
35  
36  
37  
38  
39  
40  
41  
42  
43  
44  
45  
46  
47  
48  
49  
50  
51  
52  
53  
54  
55  
56  
57  
58  
59  
60

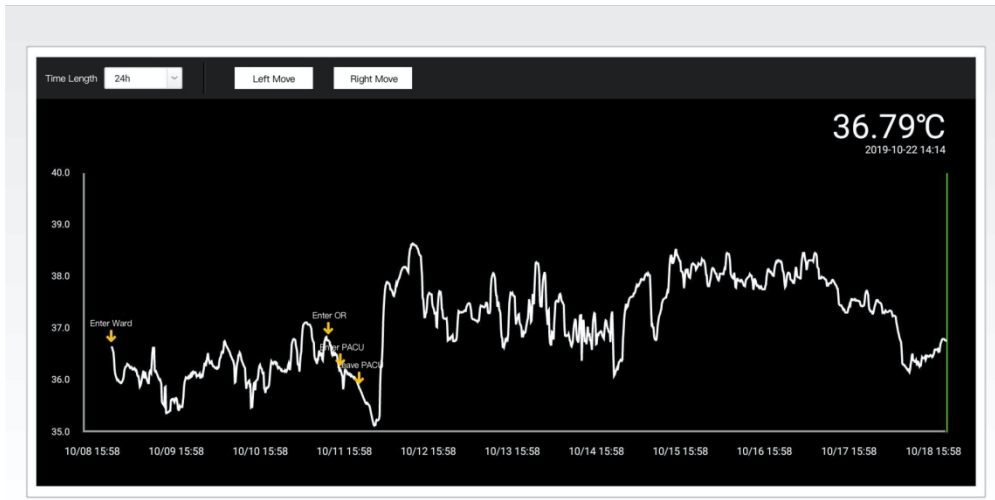

Figure 1. Example of a patient`s temperature curve with time stamps across different clinical scenarios

675x359mm (72 x 72 DPI)

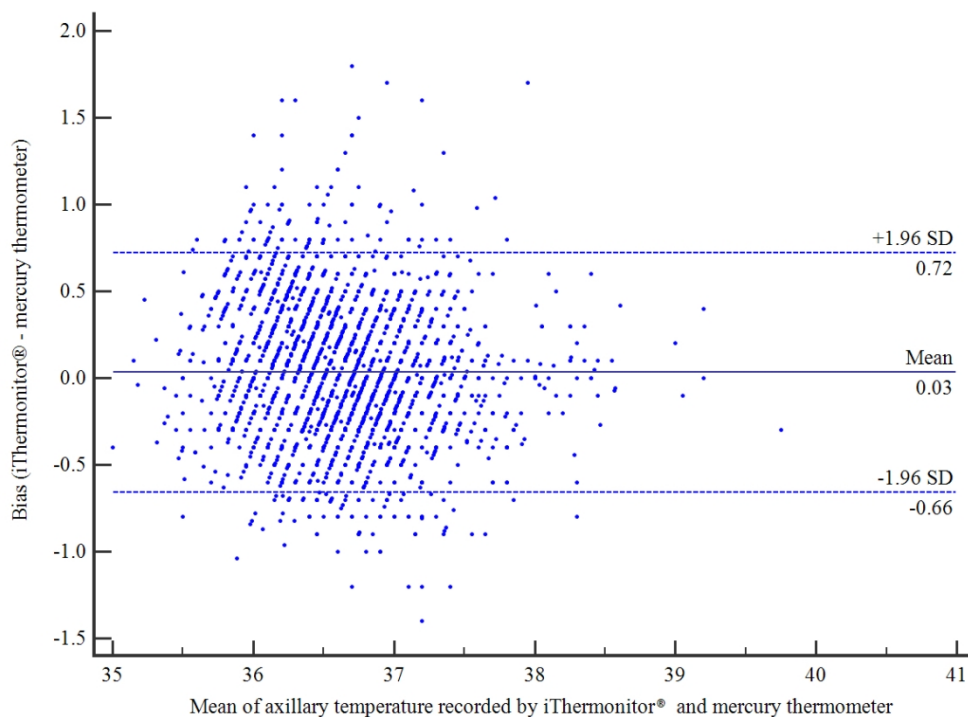

Figure 2. Bland-Altman plot of iThermonitor® axillary temperatures against mercury thermometer temperatures

423x317mm (72 x 72 DPI)

1  
2  
3  
4  
5  
6  
7  
8  
9  
10  
11  
12  
13  
14  
15  
16  
17  
18  
19  
20  
21  
22  
23  
24  
25  
26  
27  
28  
29  
30  
31  
32  
33  
34  
35  
36  
37  
38  
39  
40  
41  
42  
43  
44  
45  
46  
47  
48  
49  
50  
51  
52  
53  
54  
55  
56  
57  
58  
59  
60

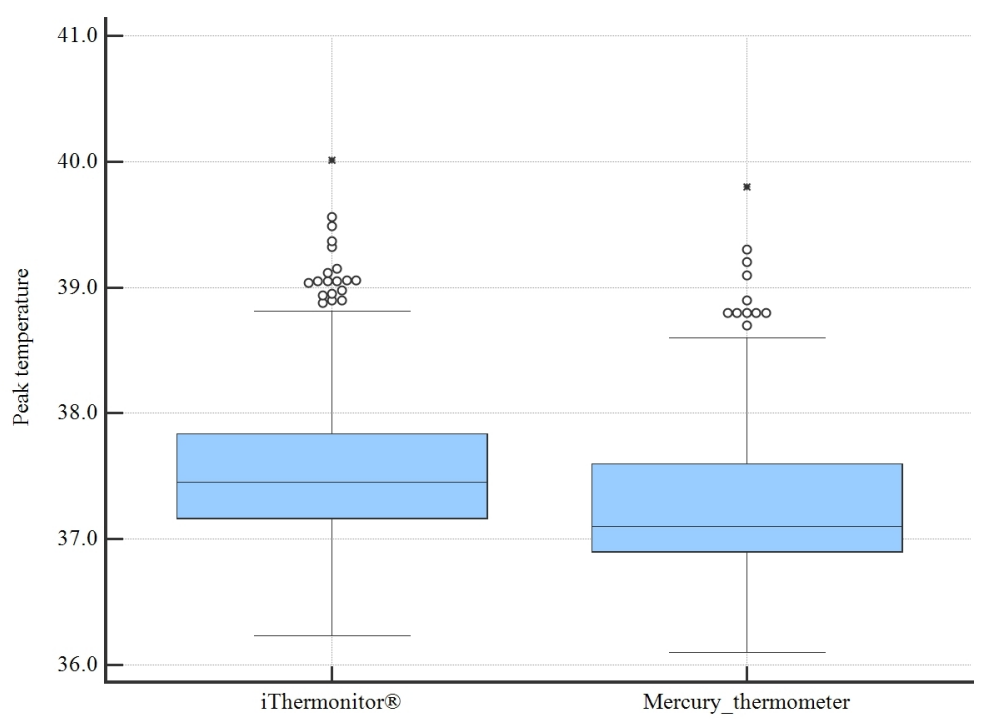

Figure 3. Peak temperature recorded by iThermonitor® and mercury thermometer.  
101x76mm (300 x 300 DPI)

## APPENDIX

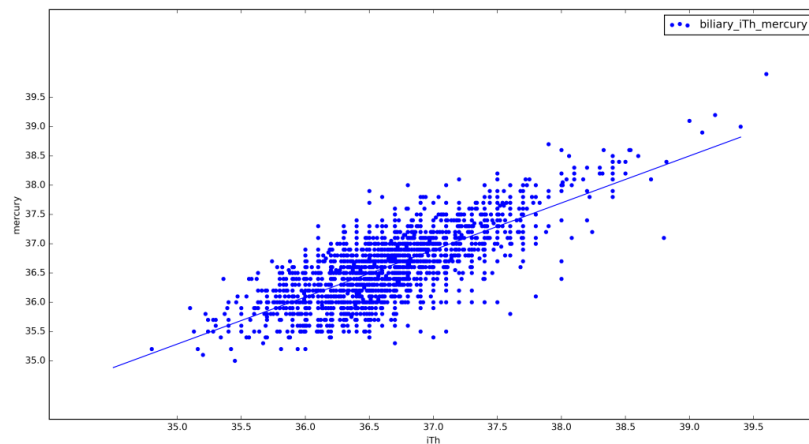

Appendix figure A. Scatter plot of iThermonitor® axillary temperatures (x-axis) against mercury thermometer temperatures (y-axis). Pearson's correlation coefficient  $r=0.755$ ,  $P<0.001$ .

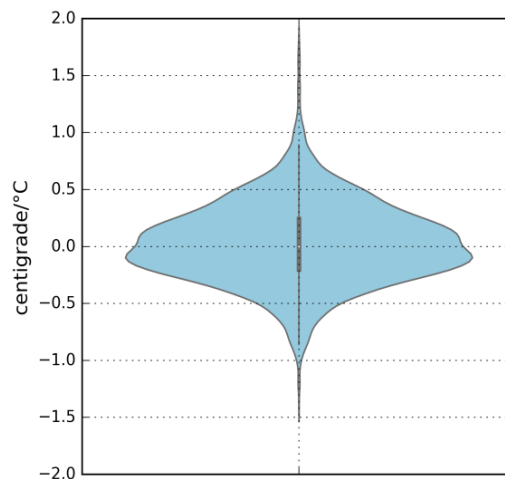

Appendix figure B. Distribution of the difference of axillary temperatures, calculated by iThermonitor® minus mercury thermometer.

Appendix table A. Comfort scores of the iThermonitor® wearing

| Score | Description                                           | Count (%) |
|-------|-------------------------------------------------------|-----------|
| 1     | Most uncomfortable and intolerable                    | 0 (0)     |
| 2     | Mild discomfort and tolerable                         | 21 (19.3) |
| 3     | No obvious feeling and do not affect daily activities | 81 (74.3) |
| 4     | Comfortable                                           | 6 (5.5)   |
| 5     | Very comfortable                                      | 1 (0.9)   |

| Section & Topic          | No  | Item                                                                                                                                                   | Reported on page # |
|--------------------------|-----|--------------------------------------------------------------------------------------------------------------------------------------------------------|--------------------|
| <b>TITLE OR ABSTRACT</b> |     |                                                                                                                                                        |                    |
|                          | 1   | Identification as a study of diagnostic accuracy using at least one measure of accuracy (such as sensitivity, specificity, predictive values, or AUC)  | Page 3             |
| <b>ABSTRACT</b>          |     |                                                                                                                                                        |                    |
|                          | 2   | Structured summary of study design, methods, results, and conclusions (for specific guidance, see STARD for Abstracts)                                 | Page 2-3           |
| <b>INTRODUCTION</b>      |     |                                                                                                                                                        |                    |
|                          | 3   | Scientific and clinical background, including the intended use and clinical role of the index test                                                     | Page 4-5           |
|                          | 4   | Study objectives and hypotheses                                                                                                                        | Page 6             |
| <b>METHODS</b>           |     |                                                                                                                                                        |                    |
| <i>Study design</i>      | 5   | Whether data collection was planned before the index test and reference standard were performed (prospective study) or after (retrospective study)     | Page 6             |
| <i>Participants</i>      | 6   | Eligibility criteria                                                                                                                                   | Page 6             |
|                          | 7   | On what basis potentially eligible participants were identified (such as symptoms, results from previous tests, inclusion in registry)                 | Page 6             |
|                          | 8   | Where and when potentially eligible participants were identified (setting, location and dates)                                                         | Page 6             |
|                          | 9   | Whether participants formed a consecutive, random or convenience series                                                                                | Page 6             |
| <i>Test methods</i>      | 10a | Index test, in sufficient detail to allow replication                                                                                                  | Page 7-8           |
|                          | 10b | Reference standard, in sufficient detail to allow replication                                                                                          | Page 7-8           |
|                          | 11  | Rationale for choosing the reference standard (if alternatives exist)                                                                                  | Page 8             |
|                          | 12a | Definition of and rationale for test positivity cut-offs or result categories of the index test, distinguishing pre-specified from exploratory         | Page 9             |
|                          | 12b | Definition of and rationale for test positivity cut-offs or result categories of the reference standard, distinguishing pre-specified from exploratory | Page 9             |
|                          | 13a | Whether clinical information and reference standard results were available to the performers/readers of the index test                                 | Page 9             |
|                          | 13b | Whether clinical information and index test results were available to the assessors of the reference standard                                          | Page 9             |
| <i>Analysis</i>          | 14  | Methods for estimating or comparing measures of diagnostic accuracy                                                                                    | Page 10            |
|                          | 15  | How indeterminate index test or reference standard results were handled                                                                                | Page 10            |
|                          | 16  | How missing data on the index test and reference standard were handled                                                                                 | Page 11            |
|                          | 17  | Any analyses of variability in diagnostic accuracy, distinguishing pre-specified from exploratory                                                      | Page 13            |
|                          | 18  | Intended sample size and how it was determined                                                                                                         | Page 10            |
| <b>RESULTS</b>           |     |                                                                                                                                                        |                    |
| <i>Participants</i>      | 19  | Flow of participants, using a diagram                                                                                                                  | Page 11            |
|                          | 20  | Baseline demographic and clinical characteristics of participants                                                                                      | Page 11            |
|                          | 21a | Distribution of severity of disease in those with the target condition                                                                                 | Page 13            |
|                          | 21b | Distribution of alternative diagnoses in those without the target condition                                                                            | Page 13            |
|                          | 22  | Time interval and any clinical interventions between index test and reference standard                                                                 | Page 11            |
| <i>Test results</i>      | 23  | Cross tabulation of the index test results (or their distribution) by the results of the reference standard                                            | Page 14            |
|                          | 24  | Estimates of diagnostic accuracy and their precision (such as 95% confidence intervals)                                                                | Page 14            |
|                          | 25  | Any adverse events from performing the index test or the reference standard                                                                            | Page 15            |
| <b>DISCUSSION</b>        |     |                                                                                                                                                        |                    |
|                          | 26  | Study limitations, including sources of potential bias, statistical uncertainty, and generalisability                                                  | Page 18            |
|                          | 27  | Implications for practice, including the intended use and clinical role of the index test                                                              | Page 17-18         |
| <b>OTHER INFORMATION</b> |     |                                                                                                                                                        |                    |
|                          | 28  | Registration number and name of registry                                                                                                               | Page 19            |
|                          | 29  | Where the full study protocol can be accessed                                                                                                          | Page 19            |
|                          | 30  | Sources of funding and other support; role of funders                                                                                                  | Page 19            |

# STARD 2015

---

## AIM

STARD stands for “Standards for Reporting Diagnostic accuracy studies”. This list of items was developed to contribute to the completeness and transparency of reporting of diagnostic accuracy studies. Authors can use the list to write informative study reports. Editors and peer-reviewers can use it to evaluate whether the information has been included in manuscripts submitted for publication.

---

## EXPLANATION

A **diagnostic accuracy study** evaluates the ability of one or more medical tests to correctly classify study participants as having **atarget condition**. This can be a disease, a disease stage, response or benefit from therapy, or an event or condition in the future. A medical test can be an imaging procedure, a laboratory test, elements from history and physical examination, a combination of these, or any other method for collecting information about the current health status of a patient.

The test whose accuracy is evaluated is called **index test**. A study can evaluate the accuracy of one or more index tests. Evaluating the ability of a medical test to correctly classify patients is typically done by comparing the distribution of the index test results with those of the **reference standard**. The reference standard is the best available method for establishing the presence or absence of the target condition. An accuracy study can rely on one or more reference standards.

If test results are categorized as either positive or negative, the cross tabulation of the index test results against those of the reference standard can be used to estimate the **sensitivity** of the index test (the proportion of participants *with* the target condition who have a positive index test), and its **specificity** (the proportion *without* the target condition who have a negative index test). From this cross tabulation (sometimes referred to as the contingency or “2x2” table), several other accuracy statistics can be estimated, such as the positive and negative **predictive values** of the test. Confidence intervals around estimates of accuracy can then be calculated to quantify the statistical **precision** of the measurements.

If the index test results can take more than two values, categorization of test results as positive or negative requires a **test positivity cut-off**. When multiple such cut-offs can be defined, authors can report a receiver operating characteristic (ROC) curve which graphically represents the combination of sensitivity and specificity for each possible test positivity cut-off. The **area under the ROC curve** informs in a single numerical value about the overall diagnostic accuracy of the index test.

The **intended use** of a medical test can be diagnosis, screening, staging, monitoring, surveillance, prediction or prognosis. The **clinical role** of a test explains its position relative to existing tests in the clinical pathway. A replacement test, for example, replaces an existing test. A triage test is used before an existing test; an add-on test is used after an existing test.

Besides diagnostic accuracy, several other outcomes and statistics may be relevant in the evaluation of medical tests. Medical tests can also be used to classify patients for purposes other than diagnosis, such as staging or prognosis. The STARD list was not explicitly developed for these other outcomes, statistics, and study types, although most STARD items would still apply.

---

## DEVELOPMENT

This STARD list was released in 2015. The 30 items were identified by an international expert group of methodologists, researchers, and editors. The guiding principle in the development of STARD was to select items that, when reported, would help readers to judge the potential for bias in the study, to appraise the applicability of the study findings and the validity of conclusions and recommendations. The list represents an update of the first version, which was published in 2003.

More information can be found on <http://www.equator-network.org/reporting-guidelines/stard>.

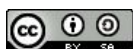

# BMJ Open

## Evaluation of a wearable wireless device with artificial intelligence, iThermonitor® WT705, for continuous temperature monitoring for patients in surgical wards: a prospective comparative study

|                                 |                                                                                                                                                                                                                                                                                                                                                                                                                                                                                                                                                                                                                          |
|---------------------------------|--------------------------------------------------------------------------------------------------------------------------------------------------------------------------------------------------------------------------------------------------------------------------------------------------------------------------------------------------------------------------------------------------------------------------------------------------------------------------------------------------------------------------------------------------------------------------------------------------------------------------|
| Journal:                        | <i>BMJ Open</i>                                                                                                                                                                                                                                                                                                                                                                                                                                                                                                                                                                                                          |
| Manuscript ID                   | bmjopen-2020-039474.R1                                                                                                                                                                                                                                                                                                                                                                                                                                                                                                                                                                                                   |
| Article Type:                   | Original research                                                                                                                                                                                                                                                                                                                                                                                                                                                                                                                                                                                                        |
| Date Submitted by the Author:   | 08-Sep-2020                                                                                                                                                                                                                                                                                                                                                                                                                                                                                                                                                                                                              |
| Complete List of Authors:       | Liu, Yuwei; Sichuan University West China Hospital, Department of general surgery<br>Liu, Changqing; Sichuan University West China Hospital, Operating room<br>Gao, Min; Sichuan University West China Hospital, Department of biliary surgery<br>Wang, Yan; Sichuan University West China Hospital, Department of biliary surgery<br>Bai, Yangjing; Sichuan University West China Hospital, Department of cardiac and macrovascular surgery<br>Xu, Ruihua; Sichuan University West China Hospital, Department of biliary surgery<br>Gong, Renrong; Sichuan University West China Hospital, West China School of Nursing |
| <b>Primary Subject Heading</b>: | Nursing                                                                                                                                                                                                                                                                                                                                                                                                                                                                                                                                                                                                                  |
| Secondary Subject Heading:      | Surgery                                                                                                                                                                                                                                                                                                                                                                                                                                                                                                                                                                                                                  |
| Keywords:                       | Health informatics < BIOTECHNOLOGY & BIOINFORMATICS, Adult surgery < SURGERY, Physiology < NATURAL SCIENCE DISCIPLINES, Telemedicine < BIOTECHNOLOGY & BIOINFORMATICS                                                                                                                                                                                                                                                                                                                                                                                                                                                    |
|                                 |                                                                                                                                                                                                                                                                                                                                                                                                                                                                                                                                                                                                                          |

SCHOLARONE™  
Manuscripts



I, the Submitting Author has the right to grant and does grant on behalf of all authors of the Work (as defined in the below author licence), an exclusive licence and/or a non-exclusive licence for contributions from authors who are: i) UK Crown employees; ii) where BMJ has agreed a CC-BY licence shall apply, and/or iii) in accordance with the terms applicable for US Federal Government officers or employees acting as part of their official duties; on a worldwide, perpetual, irrevocable, royalty-free basis to BMJ Publishing Group Ltd ("BMJ") its licensees and where the relevant Journal is co-owned by BMJ to the co-owners of the Journal, to publish the Work in this journal and any other BMJ products and to exploit all rights, as set out in our [licence](#).

The Submitting Author accepts and understands that any supply made under these terms is made by BMJ to the Submitting Author unless you are acting as an employee on behalf of your employer or a postgraduate student of an affiliated institution which is paying any applicable article publishing charge ("APC") for Open Access articles. Where the Submitting Author wishes to make the Work available on an Open Access basis (and intends to pay the relevant APC), the terms of reuse of such Open Access shall be governed by a Creative Commons licence – details of these licences and which [Creative Commons](#) licence will apply to this Work are set out in our licence referred to above.

Other than as permitted in any relevant BMJ Author's Self Archiving Policies, I confirm this Work has not been accepted for publication elsewhere, is not being considered for publication elsewhere and does not duplicate material already published. I confirm all authors consent to publication of this Work and authorise the granting of this licence.



1  
2  
3  
4 **Evaluation of a wearable wireless device with artificial intelligence,**  
5  
6 **iThermonitor® WT705, for continuous temperature monitoring for**  
7  
8 **patients in surgical wards: a prospective comparative study**  
9  
10

11  
12 Yuwei Liu,<sup>1,2</sup> Changqing Liu,<sup>3</sup> Min Gao,<sup>2</sup> Yan Wang,<sup>2</sup> Yangjing Bai,<sup>4</sup> Ruihua Xu,<sup>1, 2</sup>  
13  
14 Renrong Gong<sup>1,5</sup>  
15  
16

17  
18 <sup>1</sup> *West China School of Nursing, Sichuan University, Chengdu, P.R.China*  
19

20 <sup>2</sup> *Department of biliary surgery, West China Hospital of Sichuan University, Chengdu,*  
21 *P.R.China*  
22

23 <sup>3</sup> *Department of operating room, West China Hospital of Sichuan University, Chengdu,*  
24 *P.R.China*  
25

26 <sup>4</sup> *Department of cardiac and macrovascular surgery, West China Hospital of Sichuan*  
27 *University, Chengdu, P.R.China*  
28

29 <sup>5</sup> *Department of surgery, West China Hospital of Sichuan University, Chengdu, P.R.China*  
30  
31

32  
33  
34 **Key words:** Monitoring, Physiologic; Body Temperature; Wearable Electronic  
35  
36  
37  
38  
39  
40  
41  
42  
43  
44  
45  
46  
47  
48  
49  
50  
51  
52  
53  
54  
55  
56  
57  
58  
59  
60  
Devices

41 **Correspondence to**

42  
43 Renrong Gong; gongrenrong@wchscu.cn

44  
45 RuihuaXu; xuruihua@wchscu.cn  
46  
47  
48  
49  
50  
51  
52  
53  
54  
55  
56  
57  
58  
59  
60

## ABSTRACT

**Objectives:** To evaluate a new generation of a noninvasive wireless axillary thermometer with artificial intelligence, the iThermonitor<sup>®</sup> (WT705, Raiing Medical, Beijing, China), and to ascertain its feasibility for perioperative continuous body temperature monitoring in surgical patients.

**Setting:** Department of biliary surgery, operating room, and post-anesthesia care unit of a university teaching hospital in Chengdu, China.

**Participants:** A total of 526 adult surgical patients were consecutively enrolled.

**Design:** This was a prospective observational study. Axillary temperatures were continuously recorded by the iThermonitor<sup>®</sup> throughout the whole perioperative period. The temperatures of the contra lateral armpit were measured as references with mercury thermometers routinely at 8:00, 12:00, 16:00, and 20:00 every day.

**Outcome measures:** The outcomes were the accuracy and precision of the temperatures measured by the iThermonitor<sup>®</sup>, the validity to detect fever, and the feasibility of continuous wearing. Pairs of temperatures were evaluated by student *t*-test, Pearson's correlation, and repeated-measured Bland-Altman plot.

**Results:** A total of 3621 pairs of body temperatures were obtained. The temperatures measured by the iThermonitor<sup>®</sup> agreed with those by mercury thermometers overall, with a mean difference of  $0.03^{\circ}\text{C} \pm 0.36^{\circ}\text{C}$  and a moderate correlation ( $r=0.755$ ,  $P < 0.001$ ). The 95% limits of agreement ranged from  $-0.63^{\circ}\text{C}$  to  $0.73^{\circ}\text{C}$ , with 5.11% of the differences outside the 95% limits of agreement. The Intra-class correlation coefficient was 0.753. The continuous temperature monitoring captured more fevers

1  
2  
3  
4 than intermittent observation (117/526 vs. 91/526,  $P < 0.001$ ), detected fever up to  
5  
6 4.35 hours earlier, and captured higher peak temperature ( $0.29^{\circ}\text{C} \pm 0.27^{\circ}\text{C}$ , 95%CI:  
7  
8 0.26-0.31). All subjects felt that wearing the iThermonitor<sup>®</sup> was more or less  
9  
10 comfortable and did not affect their daily activities.  
11  
12

13  
14 **Conclusions:** The iThermonitor<sup>®</sup> is promising for continuous remote temperature  
15  
16 monitoring in surgical patients. However, further developments still need for this  
17  
18 device to improve its precision, especially for temperature detections in skinny  
19  
20 patients and those with lower body temperature.  
21  
22  
23

### 24 25 26 **Strengths and limitations of this study**

- 27  
28 ■ A wearable wireless device with artificial intelligence, iThermonitor<sup>®</sup> WT705,  
29  
30 was evaluated for continuous temperature monitoring in surgical patients.  
31  
32
- 33  
34 ■ Axillary temperature was remotely monitored in different clinical scenarios  
35  
36 throughout the whole perioperative period.  
37  
38
- 39  
40 ■ More algorithm training and developments were still need for this device to  
41  
42 improve its precision, especially for temperature detections in skinny patients and  
43  
44 those with lower body temperature.  
45  
46
- 47  
48 ■ Only axillary temperatures were detected for the evaluation of the  
49  
50 iThermonitor<sup>®</sup>.  
51
- 52  
53 ■ The validity of the device were not tested in the ICU and / or in patients with  
54  
55 compromised hemodynamic which might change the skin perfusion and  
56  
57 temperature.  
58  
59  
60

## INTRODUCTION

Body temperature is one of the most foundational vital signs of patients. Surgical patients are typically exposed to cold environments, administrations of unwarmed intravenous fluids, bacteria invasions and anesthetic drugs which may impair the thermoregulatory system,<sup>1</sup> leading to perturbations of body temperature. Accurately monitoring the body temperature is essential to prevent hypothermia, detect infectious complications for surgical patients.<sup>2,3</sup>

No ideal device has been developed yet<sup>4</sup> to continuously monitor body temperature across different clinical settings with satisfactory accuracy, availability and affordability.<sup>5</sup> Peripheral thermometers measuring temperature from the tympanic membrane, temporal artery, oral cavity, forehead, or other parts are considered to be not stable and accurate enough.<sup>6-8</sup> Inserts of a temperature probe to the esophageal, pulmonary artery, nasopharynx, rectum, or bladder could precisely and continuously detect the core temperature,<sup>9</sup> but these invasive devices increased the risk of infection and were only used for the patients in intensive care units and the surgical patients under anesthesia when necessary.<sup>10,11</sup> Until today, there are still urgent needs of thermometers to accurately and continuously monitor body temperature in clinical practice.

Wearable technology is changing the way that body temperatures have been measured and clinical cares have been performed.<sup>12</sup> In recent years, several wireless dermal wearable thermometers increased the feasibility of continuous body temperature monitoring outside of the critical care setting.<sup>13</sup> However, only a small proportion of

1  
2  
3  
4 wearable devices have been CE marked (class II or above) or FDA approved as  
5  
6 medical devices.<sup>14</sup> There are still few options with convincing evidences to support  
7  
8 their usages in clinical environments.<sup>15</sup> Wearable devices reflecting skin temperatures  
9  
10 have been proved to have strong bias and poor correlations with oral temperatures,<sup>16</sup>  
11  
12 or tympanic temperatures.<sup>17</sup> Zsuzsanna Balla *et al.*<sup>13</sup> found seven wireless dermal  
13  
14 thermometers reflecting core temperatures through internet searching, and tested four  
15  
16 of them (FeverSmart, iThermonitor<sup>®</sup>WT701, Quest Temp Sitter, and Thermochron  
17  
18 iButton), which were commercially available. The results indicated that they were not  
19  
20 reliable and accurate enough for most types of clinical researches, although the  
21  
22 iThermonitor<sup>®</sup> WT701 systems had the least unsatisfactory correlation to rectal  
23  
24 thermometers. Moreover, surgical patients were typically transferred between  
25  
26 multiple units of cares (i.e., Surgical Wards, Operating Room, Post-anesthesia Care  
27  
28 Unit). Because of the challenges during the scenarios changes such as tissue perfusion,  
29  
30 physical activity, length of wearing time, and different compliances between awake  
31  
32 patients and those under anesthesia, it remains unclear whether these devices are  
33  
34 capable of continuous temperature monitoring across different clinical scenarios. In  
35  
36 addition, battery life and internal storage space limited their application.  
37  
38  
39  
40  
41  
42  
43  
44  
45  
46  
47

48 A new generation of a noninvasive wireless axillary thermometer, iThermonitor<sup>®</sup>  
49  
50 WT705, was developed with advanced versions of machine learning algorithms for  
51  
52 the needs of continuous remote monitoring of body temperature (including core  
53  
54 temperature) in different clinical settings. Although the previous version of  
55  
56 iThermonitor<sup>®</sup> has been reported with accuracy in representing core temperature  
57  
58  
59  
60

1  
2  
3  
4 (distal esophagus temperature) in patients under anesthesia,<sup>18</sup> the performances of the  
5  
6 latest version have not been tested in surgical wards yet. Therefore, we conducted a  
7  
8 prospective study to assess the accuracy and feasibility for iThermonitor<sup>®</sup> WT705 to  
9  
10 test body temperature in awake patients in surgical wards, and its potential for  
11  
12 continuous monitoring of body temperature throughout the whole perioperative period  
13  
14 at real clinical settings.  
15  
16  
17  
18  
19  
20  
21

## 22 **METHODS**

### 23 **Study design, subjects, and setting**

24  
25 This was a prospective comparative descriptive study to evaluate the iThermonitor<sup>®</sup>  
26  
27 for continuous temperature monitoring by comparing it with mercury thermometers.  
28  
29 Patients admitted to the department of biliary surgery in West China Hospital of  
30  
31 Sichuan University were consecutively recruited in this study, from August to  
32  
33 December 2019. The inclusion criteria was that the patient signed the informed  
34  
35 consent. Patients with any impediment to wear the iThermonitor<sup>®</sup> in their axillae were  
36  
37 excluded. Finally, 526 patients were enrolled and all of them signed their informed  
38  
39 written consent.  
40  
41  
42  
43  
44  
45  
46  
47

### 48 **Instruments**

49  
50 The study instruments were: (1) Wireless noninvasive dermal thermometers  
51  
52 iThermonitor<sup>®</sup> (model WT705, Raiing Medical Company, Beijing, China), with  
53  
54 accuracy of  $\pm 0.1^{\circ}\text{C}$  ( $5^{\circ}\text{C}$ - $40^{\circ}\text{C}$ ). This is a battery-operated reusable electronic device  
55  
56 with 30 days of battery life. The US Food and Drug Administration approved it as a  
57  
58  
59  
60

1  
2  
3  
4 class II medical device. The iThermonitor<sup>®</sup> was securely attached to the axilla  
5  
6 (shaved if necessary) of patients with adhesive tapes provided by the manufacturer  
7  
8 (Figure 1). The iThermonitor<sup>®</sup> WT705 was equipped with a more powerful chip  
9  
10 developed from the previous version of WT701, which enables it to store more data  
11  
12 with time and clinical scenario stamps. The sensor would record the axillary  
13  
14 temperature once every 4 seconds, then transmit the raw data wirelessly to its  
15  
16 associated signal repeater (cHub, Raiing Medical Company, Beijing, China). The  
17  
18 cHub was attached to the bedside, with two versions of patented machine learning  
19  
20 algorithms running inside. One version was for patients in the operating room to  
21  
22 estimate core temperatures based on axillary temperatures. The other version was for  
23  
24 patients in the ward and/or home to test the axillary temperatures, as used in the  
25  
26 present study. The algorithms were designed to improve the accuracy of temperature  
27  
28 tests by adjusting for possible interferences including anesthetics, daily activities,  
29  
30 body posture changes, adhesive tape loose and/or ambient temperature, which could  
31  
32 be pre-set as needed, together with the data output frequency. The average  
33  
34 temperature per minute was transmitted wirelessly via Bluetooth or WiFi to the  
35  
36 central computer in the nurse station. The dynamic temperature curves of all patients  
37  
38 were visualized on the screen (online supplementary appendix figure 1). All the  
39  
40 iThermonitor<sup>®</sup> sensors were proofread for accuracy according to the manufacturer's  
41  
42 standard before uses. (2)Mercury-in-glass thermometers (Riyue Medical Company,  
43  
44 Chongqing, China), with accuracy of  $\pm 0.1^{\circ}\text{C}$ , over the range of  $35^{\circ}\text{C}$ - $42^{\circ}\text{C}$ . Mercury  
45  
46 thermometers were calibrated per week by comparing to a high-precision industrial  
47  
48  
49  
50  
51  
52  
53  
54  
55  
56  
57  
58  
59  
60

1  
2  
3  
4 mercury thermometer (HX-290, Chuangji Instruments Company, Hebei, China). The  
5  
6 mercury thermometers with temperature deviations greater than 0.2°C were not used.  
7  
8  
9 The iThermonitor<sup>®</sup> could be tested as a substitute choice for mercury thermometers  
10  
11 since efforts had been for countries to find alternative methods to mercury  
12  
13 thermometers.  
14  
15

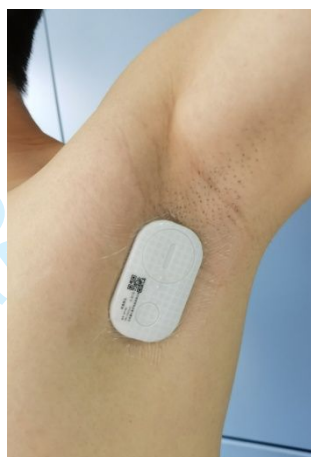

16  
17  
18  
19  
20  
21  
22  
23  
24  
25  
26  
27  
28  
29  
30  
31  
32 **Figure 1** The wear of the iThermonitor<sup>®</sup> sensor in the axilla.

### 33 34 **Data collection**

35  
36  
37 Age, gender, and BMI were extracted from the medical records. The iThermonitor<sup>®</sup>  
38  
39 sensor was attached to the dried and cleaned skin in the armpit region from the first  
40  
41 day of admission to continuously record the body temperature throughout the whole  
42  
43 perioperative period, except during a CT scan or a shower. The axillary skin was  
44  
45 checked by registered nurses everyday for local skin allergy or other adverse reactions.  
46  
47  
48 Patients were asked to complete a questionnaire ([online supplementary appendix](#)  
49  
50  
51 [Table 1](#)) to evaluate the tolerability of the iThermonitor<sup>®</sup> on the day of discharge.  
52  
53

54  
55  
56 Among the temperatures measured by mercury thermometers routinely at 8:00  
57  
58 AM, 12:00 AM, 16:00 PM and 20:00 PM every day, those at 8:00 AM and 16:00 PM  
59  
60



1  
2  
3  
4 were selected and paired with the temperatures tested by the iThermonitor<sup>®</sup>, because  
5  
6 two specially trained registered nurses were assigned to measure the temperature at  
7  
8 day shift. One nurse measured a temperature with a mercury thermometer and  
9  
10 recorded it together the time of the measurement. The other nurse read the  
11  
12 temperature tested by the iThermonitor<sup>®</sup> of the same patient at the same time from the  
13  
14 central monitoring station. Meanwhile, the activity, state of consciousness, and  
15  
16 armpits sweating were assessed and recorded.  
17  
18  
19  
20  
21

22  
23 Once the difference between the concurrent temperatures measured by the two  
24  
25 devices was over than 1°C, the measurement was repeated immediately with a  
26  
27 mercury thermometer, and the wear of the iThermonitor<sup>®</sup> was checked. When  
28  
29 improper measurements or/and wears were confirmed, the corresponding sets of data  
30  
31 were excluded. Only the differences were confirmed to really exist, the data were  
32  
33 included for further analyses.  
34  
35  
36  
37

### 38 **Main end points**

39  
40 The following endpoints are evaluated:

41  
42 - Accuracy. The accuracy was expressed as the mean of the difference (also called  
43  
44 bias) and the standard deviation, as calculated by temperature recorded by  
45  
46 iThermonitor<sup>®</sup> minus that by mercury thermometers. A priori, an absolute difference  
47  
48 of 0.5°C was considered to be clinically acceptable.<sup>18 19</sup>  
49  
50  
51

52  
53 - Precision. Precision (also called reliability) was tested by the 95% limits of  
54  
55 agreement (95% LoA) and Intra-class correlation coefficient (ICC). As in previous  
56  
57 studies,<sup>17 18</sup> the 95% LoA within  $\pm 0.5^{\circ}\text{C}$  and ICC greater than 0.7 would be  
58  
59 considered as well accepted precision.  
60

1  
2  
3  
4 - Validity. Taking recordings of mercury thermometers as references, the validity  
5  
6 of the iThermonitor<sup>®</sup> was evaluated by the sensitivity and specificity to detect fever.  
7  
8  
9 Axillary temperatures of 38°C were considered as a cut-off value of fever, according  
10  
11 to the Brighton Collaboration Fever Working Group's definition.<sup>20</sup> The peak  
12  
13 temperatures recorded by the two methods were also compared. In addition, the first  
14  
15 time for the iThermonitor<sup>®</sup> to detect the body temperature exceeded 38°C (lasting at  
16  
17 least 5 minutes) was compared with the first time for mercury thermometers to detect  
18  
19 fever.  
20  
21  
22  
23

24 - Feasibility. The feasibility of continuous temperature monitoring was assessed  
25  
26 with a comfort score ([online supplementary appendix table 1](#)) and possible adverse  
27  
28 events. Any adverse event, such as skin blisters or ulcers caused by iThermonitor<sup>®</sup>, or  
29  
30 breakages of mercury thermometers, were included.  
31  
32  
33  
34

### 35 **Statistics**

36  
37 Data were analyzed by Python (Version 3.5.1) and MedCalc (Version 19.1.3)  
38  
39 software. Means and standard deviations of temperatures were calculated for the  
40  
41 iThermonitor<sup>®</sup> and mercury thermometers. Quantitative data are expressed as mean  $\pm$   
42  
43 standard deviation. The Student's *t*-test for matched pairs, Pearson's correlation  
44  
45 analysis and repeated-measured Bland-Altman plot were used to evaluate the  
46  
47 relationship between the two sets of temperatures. Possible factors associated with the  
48  
49 accuracy were estimated by multiple linear regression analysis.  $P < 0.05$  was  
50  
51 considered statistically significant.  
52  
53  
54  
55  
56  
57

### 58 **Sample Size Considerations**

1  
2  
3  
4 The sample size module for Bland-Altman plot of MedCalc software was conducted  
5  
6 to estimate the sample size. An expected mean of differences was set as 0.03°C, with  
7  
8 a standard deviation of 0.23°C, according to our previous pilot study. This calculation  
9  
10 set a maximally allowed difference of 0.5°C (usually recognized as clinically  
11  
12 significant),<sup>17 18</sup> a type I error rate (Alpha) of 0.05, and a power of 80%. Finally, 3292  
13  
14 pairs of data were deemed sufficient to detect a difference between the iThermonitor®  
15  
16 and mercury thermometers.  
17  
18  
19  
20

### 21 **Patient and public involvement**

22  
23  
24 No patients or members of the public were involved in the design of this study, the  
25  
26 implementation of the study, or the result dissemination.  
27  
28  
29  
30

## 31 **RESULTS**

### 32 **Characteristics of the patients**

33  
34  
35 A sum of 526 patients were enrolled. All of them completed the study and were  
36  
37 included in the final analysis. No missing values needed to be processed. Temperature  
38  
39 curves with time stamps across different clinical scenarios were recorded for each  
40  
41 patient ([online supplementary appendix figure 1](#)). Among the 526 patients, there were  
42  
43 197 (37.5%) males and 329 (62.5%) females, with an average age of 53.47±14.46  
44  
45 years (over the range of 15-86 years). The cumulative monitoring duration was 1768  
46  
47 days, with an average of 3.37±2.95 days for each patient. Patients were allowed to  
48  
49 ambulate inside the hospital although most patients remained at their bedsides for  
50  
51 daily activities, due to their surgeries. Room temperature was 24.2°C±1.3°C  
52  
53  
54  
55  
56  
57  
58  
59  
60

(22°C-26°C), maintained by the central air conditioning system in the hospital.

Demographic characteristics are shown in Table 1.

**Table 1** Description of the patients

| Variable                                                                     | Summary                  |
|------------------------------------------------------------------------------|--------------------------|
| <b><i>Patient Characteristics (N<sub>1</sub>=526)</i></b>                    |                          |
| Age (years)                                                                  | 53.47±14.46 (15-86)      |
| Gender                                                                       |                          |
| Male (%)                                                                     | 197 (37.5%)              |
| Female (%)                                                                   | 329 (62.5%)              |
| BMI (kg/m <sup>2</sup> )                                                     | 23.21±3.09 (15.21-37.78) |
| Average monitor duration (days)                                              | 3.37±2.95 (1-22)         |
| Cumulative monitor duration (days)                                           | 1768                     |
| <b><i>Patient status when measuring temperature (N<sub>2</sub>=3621)</i></b> |                          |
| Mobility                                                                     |                          |
| Stay in bed                                                                  | 3490 (96.38%)            |
| Off-bed activities                                                           | 131 (3.62%)              |
| Consciousness                                                                |                          |
| Awake                                                                        | 3572 (98.65%)            |
| Sleep                                                                        | 49 (1.35%)               |
| Sweating in the axilla                                                       | 26 (0.72%)               |

Data are presented as n (%) for categorical variables or mean±SD for continuous variables.

Abbreviation: BMI, body mass index. N<sub>1</sub>: number of patients, N<sub>2</sub>: number of paired temperature data sets.

### **Accuracy and precision of the iThermonitor<sup>®</sup>**

A total of 3621 pairs of body temperatures were obtained. The mean temperature measured by the iThermonitor<sup>®</sup> was 36.61°C±0.49°C, ranged from 34.8°C to 39.6°C, while the mean temperature measured by mercury thermometers was 36.58°C±0.52°C, ranged from 35.0°C to 39.9°C. The mean of difference (bias) between the two

1  
2  
3  
4 methods was  $0.03 \pm 0.35^\circ\text{C}$ , ranged from  $-1.40^\circ\text{C}$  to  $1.80^\circ\text{C}$ . The biases within  $\pm 0.5^\circ\text{C}$ ,  
5  
6 the clinically acceptable standard defined by a priori, were accounted for 87.68%,  
7  
8 while 99.17% were within  $\pm 1.0^\circ\text{C}$ . A scatter plot shows a relatively strong linear  
9  
10 correlation ( $r=0.755$ ,  $P<0.001$ ) between the two groups of temperatures ([online  
11  
12 supplementary appendix figure 2](#)). The Bland-Altman plot shows that the 95% limits  
13  
14 of agreement were broader than the predefined range, with the upper limit at  $0.73^\circ\text{C}$ ,  
15  
16 and the lower limit at  $-0.63^\circ\text{C}$ . Meanwhile, 5.11% (185/3621) of the points were  
17  
18 outside the 95% LoA ([Figure 2](#)). The intra-group correlation coefficient (ICC) was  
19  
20 0.753, indicating that the temperatures measured by the two methods were  
21  
22 moderately agreed overall.  
23  
24  
25  
26  
27  
28  
29

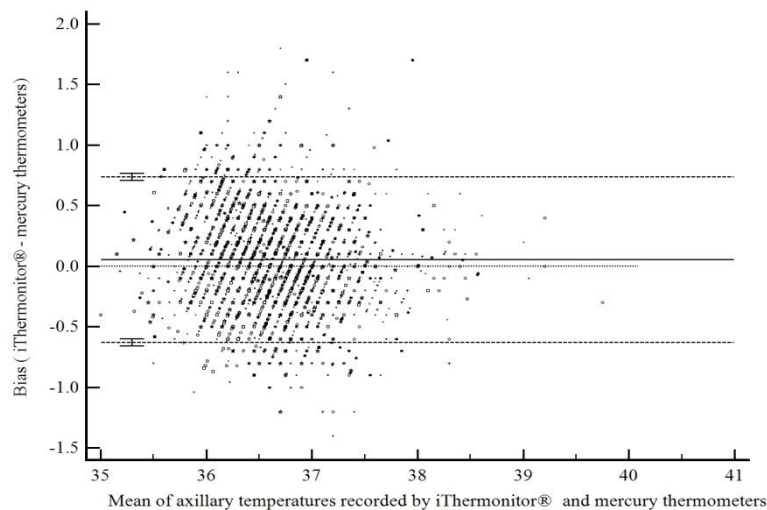

46 **Figure 2** Repeated-measured Bland-Altman plot of iThermonitor<sup>®</sup> axillary temperatures  
47 against mercury thermometer temperatures. ICC=0.753, 95% limits of agreement were from  
48  $-0.63^\circ\text{C}$  to  $0.73^\circ\text{C}$ . 5.11% of the points were outside the 95% limits of agreement.  
49  
50

### 51 **Factors associated with the difference between the two methods**

52 Possible factors associated with the difference of readings between the iThermonitor<sup>®</sup>  
53 and mercury thermometers were evaluated by the multiple linear regression model  
54  
55  
56 and mercury thermometers were evaluated by the multiple linear regression model  
57  
58  
59 ([Table 2](#)). Readings of mercury thermometers, BMI, and male gender were negatively  
60

correlated with the difference. Age, mobility, consciousness, length of wearing, and sweating in the axilla were not significantly associated with the difference.

**Table 2** Relationships of considered factors with the differences between iThermonitor® temperatures and mercury thermometer temperatures \*

| Factor considered                  | <i>B</i> | 95%CI           | <i>B<sub>s</sub></i> | <i>t</i> | <i>P</i> value |
|------------------------------------|----------|-----------------|----------------------|----------|----------------|
| Reading of mercury thermometers    | -0.295   | -0.315 : -0.275 | -0.433               | -28.737  | 0.000          |
| Female vs. male                    | -0.090   | -0.111 : -0.069 | -0.126               | -8.453   | 0.000          |
| BMI (kg/m <sup>2</sup> )           | -0.013   | -0.016 : -0.009 | -0.111               | -7.399   | 0.000          |
| Age (year)                         | 0.001    | 0.000 : 0.001   | 0.028                | 1.870    | 0.062          |
| Length of wearing (day)            | 0.001    | -0.003 : 0.003  | -0.002               | -0.130   | 0.897          |
| Stay in bed vs. off-bed activities | -0.020   | -0.075 : 0.034  | -0.011               | -0.728   | 0.467          |
| Sweating in the axilla             | 0.117    | -0.005 : 0.238  | 0.028                | 1.884    | 0.060          |
| Sleep vs. awake                    | -0.021   | -0.110 : 0.067  | -0.007               | -0.466   | 0.641          |

Estimated by multiple linear regression analysis with the dependent variable as the difference of iThermonitor® temperatures minus mercury thermometer temperatures, with all the factors entered the regression. \* $R^2=0.215$ ,  $F=123.474$ ,  $P<0.001$ .

The effects of the associated factors were further evaluated on the differences between iThermonitor® temperatures and mercury thermometer temperatures (Table 3). The differences were significant when the readings of mercury thermometers were below 36.0°C or  $\geq 38.0^\circ\text{C}$ , but not significant between 36.0°C and 37.9°C. As to the effects of genders, the iThermonitor® readings were significantly lower in male subjects, but higher in female subjects than mercury thermometer readings. Besides, there were significant differences in patients with BMI<18.5 kg/m<sup>2</sup> or ranged from 18.5 kg/m<sup>2</sup> to 23.9 kg/m<sup>2</sup>, but not ranged from 24.0 kg/m<sup>2</sup> to 27.9 kg/m<sup>2</sup> or  $\geq 28.0$  kg/m<sup>2</sup>.

**Table 3** The effects of associated factors on the temperature differences calculated by iThermonitor<sup>®</sup> readings minus mercury thermometer readings.

| Factors                          | N*   | iThermonitor <sup>®</sup><br>(°C) | Mercury<br>Thermometer(°C) | Bias (°C)  | 95%CI of<br>Bias | t      | P†    |
|----------------------------------|------|-----------------------------------|----------------------------|------------|------------------|--------|-------|
| Readings of mercury thermometers |      |                                   |                            |            |                  |        |       |
| Hypothermia (<36.0°C)            | 275  | 36.09±0.40                        | 35.71±0.18                 | 0.38±0.40  | 0.33 : 0.43      | 15.839 | 0.000 |
| Normal (36.0-37.9°C)             | 3285 | 36.63±0.42                        | 36.62±0.42                 | 0.01±0.33  | -0.01 : 0.02     | 0.979  | 0.327 |
| Fever (≥38.0°C)                  | 61   | 38.11±0.54                        | 38.27±0.36                 | -0.17±0.35 | -0.26 : -0.08    | -3.682 | 0.000 |
| Gender                           |      |                                   |                            |            |                  |        |       |
| Male                             | 1480 | 36.57±0.45                        | 36.60±0.49                 | -0.03±0.35 | -0.05 : -0.02    | -3.610 | 0.000 |
| Female                           | 2141 | 36.64±0.51                        | 36.57±0.54                 | 0.08±0.35  | 0.06 : 0.09      | 10.003 | 0.000 |
| BMI(kg/m <sup>2</sup> )          |      |                                   |                            |            |                  |        |       |
| Low (<18.5)                      | 187  | 36.74±0.42                        | 36.60±0.47                 | 0.14±0.34  | 0.09 : 0.19      | 5.368  | 0.000 |
| Normal (18.5-23.9)               | 2156 | 36.66±0.50                        | 36.63±0.53                 | 0.04±0.34  | 0.02: 0.05       | 4.869  | 0.000 |
| Overweight (24.0-27.9)           | 1018 | 36.51±0.46                        | 36.50±0.50                 | 0.01±0.36  | -0.02 : 0.03     | 0.653  | 0.514 |
| Obesity (≥28.0)                  | 260  | 36.51±0.45                        | 36.50±0.46                 | 0.01±0.43  | -0.04 : 0.07     | 0.529  | 0.598 |
| Total                            | 3621 | 36.61±0.49                        | 36.58±0.52                 | 0.03±0.35  | 0.02: 0.04       | 5.326  | 0.000 |

\* Number of paired temperature data sets. †Estimated by Student's *t* test for matched pairs.

### Comparisons of the two methods in detecting fever

Among the 526 patients, 117 of them were detected to have fever by continuous recordings with the iThermonitor<sup>®</sup>, while only 91 patients were detected by intermittent readings with mercury thermometers (Chi-square test for paired sample,  $P < 0.001$ ). A total of 124 patients were observed to have fevers by the iThermonitor<sup>®</sup> or mercury thermometers, and 84 subjects by both of the two methods.

### Comparisons of average peak temperatures

The average peak temperature captured by intermittent measurements with mercury thermometers was  $37.26^{\circ}\text{C} \pm 0.56^{\circ}\text{C}$ , whereas the continuous monitoring with the iThermonitor<sup>®</sup> detected a higher peak temperature of  $37.55^{\circ}\text{C} \pm 0.59^{\circ}\text{C}$ . A mild but statistically significant difference of  $0.29^{\circ}\text{C} \pm 0.27^{\circ}\text{C}$  (range from  $-0.45^{\circ}\text{C}$  to  $1.26^{\circ}\text{C}$ , 95%CI:  $0.26^{\circ}\text{C}$ - $0.31^{\circ}\text{C}$ ) was noted between the peak temperatures recorded by the two methods (Figure 3).

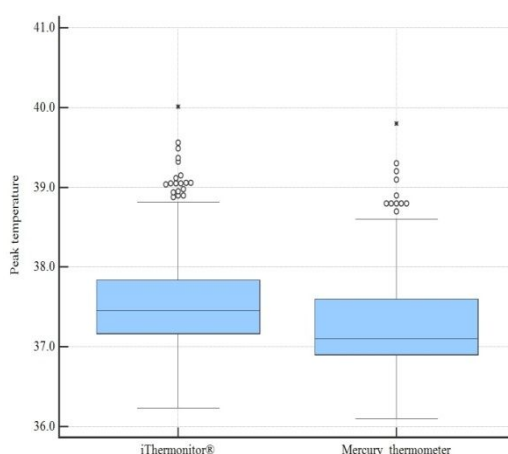

**Figure 3** Peak temperatures recorded by the iThermonitor<sup>®</sup> and mercury thermometers.

### Comparison of the earliest time to detect fevers



1  
2  
3  
4 The continuous monitoring with the iThermonitor<sup>®</sup> detected fevers earlier than  
5  
6 intermittent measurement with mercury thermometers. A mean time interval of 4.35  
7  
8 hours was observed, with a minimum difference of -0.92 hours and a maximum  
9  
10 difference of 25.34 hours.  
11  
12

### 13 14 15 **Feasibility of continuous temperature monitoring**

16  
17 During 1768 monitoring days, 4.37% (23/526) of the patients complained of slight  
18  
19 itching during the wearing period. Local skin redness was observed in two patients,  
20  
21 but all eviated after the iThermonitor<sup>®</sup> was moved to the contra-lateral axilla. The  
22  
23 comfort score from 1 to 5 was used to evaluate the feasibility, with 1 meaning most  
24  
25 uncomfortable and intolerable, 5 meaning very comfortable. In 109 patients enrolled  
26  
27 in August and September 2019, 21 of them selected the score of 2, 81 patients  
28  
29 selected the score of 3, six patients selected the score of 4, and one patient selected the  
30  
31 score of 5. All subjects felt that wearing the iThermonitor<sup>®</sup> was more or less  
32  
33 comfortable and did not affect their daily activities, indicating well acceptable  
34  
35 compliance of the iThermonitor<sup>®</sup>.  
36  
37  
38  
39  
40  
41  
42  
43  
44  
45

### 46 **DISCUSSION**

47  
48 This was a prospective study to evaluate the performance of iThermonitor<sup>®</sup> WT705, a  
49  
50 wireless dermal temperature sensor, for continuous temperature monitoring in surgical  
51  
52 patients. The iThermonitor<sup>®</sup> was selected because its performance had not been tested  
53  
54 before for continuous temperature monitoring in surgical patients, although it was one  
55  
56  
57  
58  
59  
60

of the best performed devices due to relatively high sensitivity and robustness in reflecting core temperature among the available wireless dermal thermometers.<sup>13</sup>

### Principal Findings in accuracy and precision

The iThermonitor<sup>®</sup> was compared with mercury thermometers. An overall small bias ( $0.03^{\circ}\text{C}\pm 0.35^{\circ}\text{C}$ , Table 3) and moderate correlation (Figure 2) were observed between the two devices. Nevertheless, the analysis of 95% limits of agreement indicated that the comparisons with the bias less than  $\pm 0.5^{\circ}\text{C}$  only accounted for 87.68%. Exploring the factors showed that this discrepancy was associated with the readings of mercury thermometers, genders and BMI. The largest bias ( $0.38^{\circ}\text{C}\pm 0.40^{\circ}\text{C}$ ) existed when the readings of mercury thermometers were below  $36^{\circ}\text{C}$ , with the readings of the iThermonitor<sup>®</sup> higher than mercury thermometers (Table 3). Errors might exist in manual measurements with mercury thermometers if the patient didn't maintain the proper measurement posture for enough time, leading to false body temperature readings below  $36^{\circ}\text{C}$ . A more strict supervision and repeated measurements may improve the results when the readings of mercury thermometers are below  $36^{\circ}\text{C}$ . Moreover, not every reading of mercury thermometers was double-checked. This might also lead to the biases. Besides, a significantly larger bias was also noticed in skinny patients ( $\text{BMI} < 18.5 \text{ kg/m}^2$ ), but no significant differences in overweight or obesity patients (Table 3). This result supports the earlier findings by Rubia-Rubia<sup>21</sup>, who tested four axillary thermometers and found that the difference of readings between axillary thermometers and pulmonary artery temperatures increased when the weight decreased. A possible explanation was that skinny patients might be difficult

1  
2  
3  
4 to have the thermometers properly attached to the axilla, leading to the errors in the  
5  
6 readings of axillary thermometers. Moreover, larger biases were observed in female  
7  
8 patients (Table 3). Evidences indicated that there were sex differences in  
9  
10 thermoregulatory mechanisms. Lu *et al*<sup>22</sup> reported higher oral temperatures in older  
11  
12 women than those in men. Rubia-Rubia *et al*<sup>21</sup> found the male sex increased the bias  
13  
14 between temperatures measured by digital axillary thermometer and core  
15  
16 temperatures, although they were unable to find a satisfactory explanation.  
17  
18  
19  
20  
21

### 22 **Compared To Similar Studies**

23  
24 Different reference standards and algorithm versions resulted in inconsistent accuracy  
25  
26 of iThermonitor<sup>®</sup> in previous reports. Pei *et al*.<sup>18</sup> tested the intraoperative version of  
27  
28 iThermonitor<sup>®</sup> WT701, and found that axillary temperature recordings well  
29  
30 represented core temperatures in adults under anesthesia with a mean difference of  
31  
32 only  $0.14^{\circ}\text{C}\pm 0.26^{\circ}\text{C}$  (esophageal minus axillary) and 95% limits of agreement from  
33  
34  $-0.38^{\circ}\text{C}$  to  $0.66^{\circ}\text{C}$ . It was also reported that iThermonitor<sup>®</sup> WT701 rendered lower  
35  
36 average temperatures than rectal temperatures (bias  $-0.77^{\circ}\text{C}\pm 0.53^{\circ}\text{C}$ ).<sup>13</sup> In addition,  
37  
38 the iThermonitor<sup>®</sup> was highly easy to be used to continuously monitor children's body  
39  
40 temperatures at home.<sup>23</sup> In the present study, the novel version of iThermonitor<sup>®</sup>  
41  
42 WT705 was selected and the algorithms were pre-setted for ward/home use. The  
43  
44 results demonstrated that the iThermonitor<sup>®</sup> could be used to continuously monitor  
45  
46 temperatures in surgical patients although improvements were still needed. Moreover,  
47  
48 all subjects in the study felt that wearing the iThermonitor<sup>®</sup> was more or less  
49  
50 comfortable and did not affect daily activities. This work adds evidence to support the  
51  
52  
53  
54  
55  
56  
57  
58  
59  
60

1  
2  
3  
4 applicability of iThermonitor<sup>®</sup> in surgical wards as a continuation or extension of  
5  
6 intraoperative temperature monitoring.  
7  
8

### 9 **Clinical Implications**

10  
11 The advantages and feasibility of continuous vital signs monitoring in general wards  
12 are attracting increasing attention.<sup>10 24</sup> As to body temperature monitoring, detecting  
13  
14 the time to have fevers and the peak of fever are important for diagnoses and clinical  
15  
16 decision-making. Dakappa *et al.*<sup>11</sup> noted higher peak temperature with a significant  
17  
18 difference of 1.52°C, using a continuous tympanic temperature recording device  
19  
20 (TherCom<sup>®</sup>) than using mercury thermometers three times a day. Another research  
21  
22 reported 180 minutes earlier by wearable digital thermometers (TremTraq, with a  
23  
24 battery life of 72 hours) to detect increases in body temperature than by standard  
25  
26 monitoring.<sup>24</sup> As claimed by a previous study, the iThermonitor<sup>®</sup> was marginally  
27  
28 superior in following the individual trends than in assessing absolute temperatures.<sup>13</sup>  
29  
30 The present study demonstrated that continuous temperature monitoring with the  
31  
32 iThermonitor<sup>®</sup> was better at capturing the peak of fever, and could detect fever 4.35  
33  
34 hours earlier than intermittent temperature monitoring. These findings may have  
35  
36 important therapeutic implications. Furthermore, maintaining the continuity of the  
37  
38 body temperature monitoring across different clinical scenarios helps to install a  
39  
40 real-world database of the patient's perioperative body temperature, which would  
41  
42 provide more information in exploring the regularity of perioperative temperature  
43  
44 fluctuation.  
45  
46  
47  
48  
49  
50  
51  
52  
53  
54  
55  
56  
57

58 The mercury-containing thermometer has been widely used for hundreds of years  
59  
60

1  
2  
3  
4 because of its stable performances in reflecting temperature.<sup>25</sup> However, these  
5  
6 glass-based thermometers are fragile to leak mercury out, which is one of the top ten  
7  
8 chemicals of major public health concern.<sup>26</sup> Although the World Health Organization  
9  
10 has called for the phase out of mercury fever thermometers by 2020,<sup>26</sup> they are still  
11  
12 widely used in many countries.<sup>5 27 28</sup> Gaps are evident in practices on promoting  
13  
14 mercury-free thermometers. The lack of an ideal alternative device for temperature  
15  
16 measurement is an important reason. Using the iThermonitor<sup>®</sup> instead of mercury  
17  
18 thermometers to reduce medical mercury emissions is beneficial to the patients, health  
19  
20 personnel and public health.<sup>27 28</sup>

### 21 22 23 24 25 26 27 **Limitations**

28  
29 There were several limitations in the present study. First, only axillary temperatures  
30  
31 were detected using the iThermonitor<sup>®</sup> and mercury thermometers. Adding a set of  
32  
33 core body temperatures would help better understand the validity of the device to  
34  
35 monitor body temperatures. Second, the validity of the device were not tested in the  
36  
37 ICU and/or in patients with compromised hemodynamic which might change the skin  
38  
39 perfusion and temperature. Third, armpits were randomly selected for temperature  
40  
41 measurements and the difference of armpit temperature was not taken into account  
42  
43 between the dominant and non-dominant arm, it might not exist.<sup>21</sup> Besides, an axillary  
44  
45 temperature of 38°C was set as a fever reference in the present study. However, the  
46  
47 most convincing cut-off value remains unclear, due to varying definitions of fever.<sup>7 29</sup>

48  
49  
50  
51  
52  
53  
54  
55  
56 30

### 57 58 59 **CONCLUSIONS**

1  
2  
3  
4 It is promising for the iThermonitor® to continuously monitor temperatures in  
5  
6 surgical patients. This device can improve fever detection by dynamically reflecting  
7  
8 the individual trends of body temperature throughout the whole perioperative period.  
9  
10 However, more algorithm training is still needed for this device to improve its  
11  
12 accuracy, especially when it is used in hypothermia or fever patients, female patients,  
13  
14 or skinny or even normal weight patients.  
15  
16  
17  
18  
19  
20

21 **Contributors:** Yuwei Liu participated in the conception, statistical analysis, and manuscript draft  
22 preparation. Changqing Liu was in charge of body temperature management in the OR and PACU.  
23 Min Gao and Yan Wang performed temperature measurements. Yangjing Bai participated in the  
24 design of the study. Ruihua Xu administrated the project. Renrong Gong conceived, designed and  
25 managed the running of the study, interpreted the data, and revised and finally approved the  
26 manuscript. All authors read and approved the manuscript.  
27  
28  
29  
30  
31  
32

33 **Funding:** This study was funded by the Sichuan University West China Nursing Discipline  
34 Development Special Fund Project (NO.HXHL19031).  
35  
36

37 **Competing interest:** None declared.  
38

39 **Ethics approval:** Ethical approval was obtained from the Biomedical Research Ethics Committee  
40 of West China Hospital of Sichuan University on July 4, 2019 (No. 2019-447).  
41  
42

43 **Clinical trial registration:** The study was registered at Chinese Clinical Trail Registry  
44 (ChiCTR1900024549) on July 5, 2019. The full study protocol can be accessed  
45 at [www.chictr.org.cn](http://www.chictr.org.cn).  
46  
47

48 **Data sharing statement:** Data are available upon reasonable request.  
49

50 **Open access:** This is an open access article distributed in accordance with the Creative Commons  
51 Attribution Non Commercial (CC BY-NC4.0) license, which permits others to distribute, remix,  
52 adapt, build upon this work non-commercially, and license their derivative works on  
53 different terms, provided the original work is properly cited, appropriate credit is given, any  
54 changes made indicated, and the use is non-commercial. See: <http://creativecommons.org/licenses/by-nc/4.0/>  
55  
56  
57  
58  
59  
60

## REFERENCES

1. Sessler DI. Opioids and postoperative shivering. *J Clin Anesth* 2016;31:42-43.
2. Middleton S, McElduff P, Drury P, et al. Vital sign monitoring following stroke associated with 90-day independence: A secondary analysis of the QASC cluster randomized trial. *Int J Nurs Stud* 2019;89:72-79.
3. Larach MG, Brandom BW, Allen GC, et al. Malignant Hyperthermia Deaths Related to Inadequate Temperature Monitoring, 2007–2012. *Anesthesia & Analgesia* 2014;119(6):1359-66.
4. Sollai S, Dani C, Berti E, et al. Performance of a non-contact infrared thermometer in healthy newborns. *BMJ Open* 2016;6(3):e008695.
5. Halder N, Peshin SS, Pandey RM, et al. Awareness assessment of harmful effects of mercury in a health care set-up in India: A survey-based study. *Toxicol Ind Health* 2015;31(12):1144-51.
6. Opersteny E, Anderson H, Bates J, et al. Precision, Sensitivity and Patient Preference of Non-Invasive Thermometers in a Pediatric Surgical Acute Care Setting. *J Pediatr Nurs* 2017;35:36-41.
7. Niven DJ, Gaudet JE, Laupland KB, et al. Accuracy of Peripheral Thermometers for Estimating Temperature. *Annals of Internal Medicine* 2015;163(10)
8. Geijer H, Udumyan R, Lohse G, et al. Temperature measurements with a temporal scanner: systematic review and meta-analysis. *BMJ Open* 2016;6(3):e009509.
9. Calonder EM, Sendelbach S, Hodges JS, et al. Temperature Measurement in Patients Undergoing Colorectal Surgery and Gynecology Surgery: A Comparison of Esophageal Core, Temporal Artery, and Oral Methods. *Journal of PeriAnesthesia Nursing* 2010;25(2):71-78.
10. Downey CL, Chapman S, Randell R, et al. The impact of continuous versus intermittent vital signs monitoring in hospitals: A systematic review and narrative synthesis. *Int J Nurs Stud* 2018;84:19-27.
11. Dakappa PH, Bhat GK, Bolumbu G, et al. Comparison of Conventional Mercury Thermometer and Continuous TherCom((R)) Temperature Recording in Hospitalized Patients. *J Clin Diagn Res* 2016;10(9):OC43-OC46.
12. Liao Y, Thompson C, Peterson S, et al. The Future of Wearable Technologies and Remote Monitoring in Health Care. *Am Soc Clin Oncol Educ Book* 2019;39:115-21.
13. Zsuzsanna Balla H, Theodorsson E, Strom JO. Evaluation of commercial, wireless dermal thermometers for surrogate measurements of core temperature. *Scand J Clin Lab Invest* 2019;79(1-2):1-6.
14. Muzny M, Henriksen A, Giordanengo A, et al. Wearable sensors with possibilities for data exchange: Analyzing status and needs of different actors in mobile health monitoring systems. *Int J Med Inform* 2020;133:104017.
15. Breteler MJMM, Huizinga E, van Loon K, et al. Reliability of wireless monitoring using a wearable patch sensor in high-risk surgical patients at a step-down unit in the Netherlands: a clinical validation study. *BMJ Open* 2018;8(2):e020162.
16. Izmailova ES, McLean IL, Bhatia G, et al. Evaluation of Wearable Digital Devices in a



- Phase I Clinical Trial. *Clin Transl Sci* 2019;12(3):247-56.
17. Downey C, Ng S, Jayne D, et al. Reliability of a wearable wireless patch for continuous remote monitoring of vital signs in patients recovering from major surgery: a clinical validation study from the TRaCINg trial. *BMJ Open* 2019;9(8):e031150.
  18. Pei L, Huang Y, Mao G, et al. Axillary Temperature, as Recorded by the iThermonitor WT701, Well Represents Core Temperature in Adults Having Noncardiac Surgery. *Anesth Analg* 2018;126(3):833-38.
  19. Lu SH, Dai YT, Yen CJ. The effects of measurement site and ambient temperature on body temperature values in healthy older adults: a cross-sectional comparative study. *Int J Nurs Stud* 2009;46(11):1415-22.
  20. Marcy SM, Kohl KS, Dagan R, et al. Fever as an adverse event following immunization: case definition and guidelines of data collection, analysis, and presentation. *Vaccine* 2004;22(5-6):551-56.
  21. Rubia-Rubia J, Arias A, Sierra A, et al. Measurement of body temperature in adult patients: comparative study of accuracy, reliability and validity of different devices. *Int J Nurs Stud* 2011;48(7):872-80.
  22. Lu SH, Dai YT. Normal body temperature and the effects of age, sex, ambient temperature and body mass index on normal oral temperature: a prospective, comparative study. *Int J Nurs Stud* 2009;46(5):661-8.
  23. Kakarmath SS, de Redon E, Centi AJ, et al. Assessing the Usability of an Automated Continuous Temperature Monitoring Device (iThermonitor) in Pediatric Patients: Non-Randomized Pilot Study. *JMIR Pediatr Parent* 2018;1(2):e10804.
  24. Abbasi J. Wearable Digital Thermometer Improves Fever Detection. *JAMA* 2017;318(6):510.
  25. Wright WF, Mackowiak PA. Origin, Evolution and Clinical Application of the Thermometer. *Am J Med Sci* 2016;351(5):526-34.
  26. WHO. WHO calls for the phase out of mercury fever thermometers and blood pressure measuring devices by 2020. Available at: <https://www.who.int/news-room/detail/11-10-2013-who-calls-for-the-phase-out-of-mercury-fever-thermometers-and-blood-pressure-measuring-devices-by-2020> [accessed 11 October 2013].
  27. Li P, Yang Y, Xiong W. Impacts of Mercury Pollution Controls on Atmospheric Mercury Concentration and Occupational Mercury Exposure in a Hospital. *Biol Trace Elem Res* 2015;168(2):330-4.
  28. Chadli-Debbiche A, Allani R, Jouini R, et al. Mercurial hospital waste: management, becoming and recommendations. *Tunis Med* 2018;96(5):273-80.
  29. Apa H, Gozmen S, Bayram N, et al. Clinical accuracy of tympanic thermometer and noncontact infrared skin thermometer in pediatric practice: an alternative for axillary digital thermometer. *Pediatr Emerg Care* 2013;29(9):992-7.
  30. Wright WF, Auwaerter PG. Fever and Fever of Unknown Origin: Review, Recent Advances, and Lingering Dogma. *Open Forum Infect Dis* 2020;7(5):ofaa132.



1  
2  
3  
4  
5  
6  
7  
8  
9  
10  
11  
12  
13  
14  
15  
16  
17  
18  
19  
20  
21  
22  
23  
24  
25  
26  
27  
28  
29  
30  
31  
32  
33  
34  
35  
36  
37  
38  
39  
40  
41  
42  
43  
44  
45  
46  
47  
48  
49  
50  
51  
52  
53  
54  
55  
56  
57  
58  
59  
60

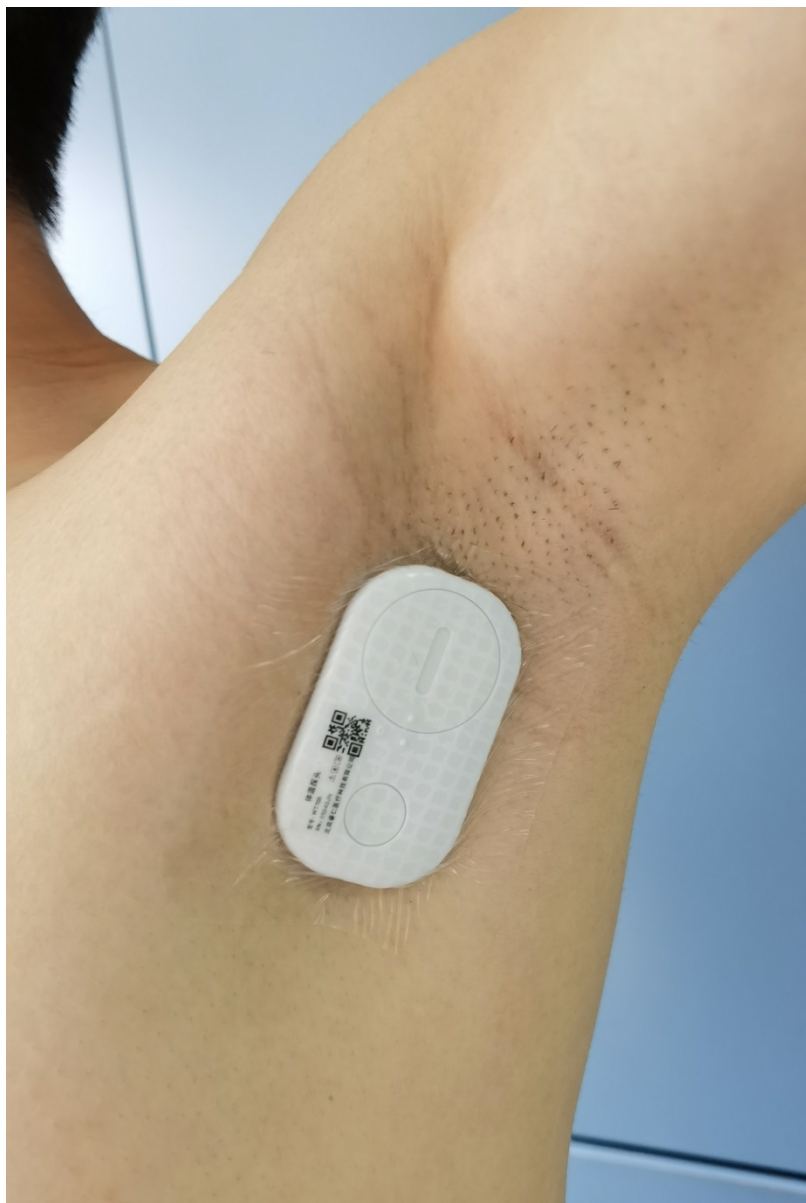

914x1354mm (72 x 72 DPI)

1  
2  
3  
4  
5  
6  
7  
8  
9  
10  
11  
12  
13  
14  
15  
16  
17  
18  
19  
20  
21  
22  
23  
24  
25  
26  
27  
28  
29  
30  
31  
32  
33  
34  
35  
36  
37  
38  
39  
40  
41  
42  
43  
44  
45  
46  
47  
48  
49  
50  
51  
52  
53  
54  
55  
56  
57  
58  
59  
60

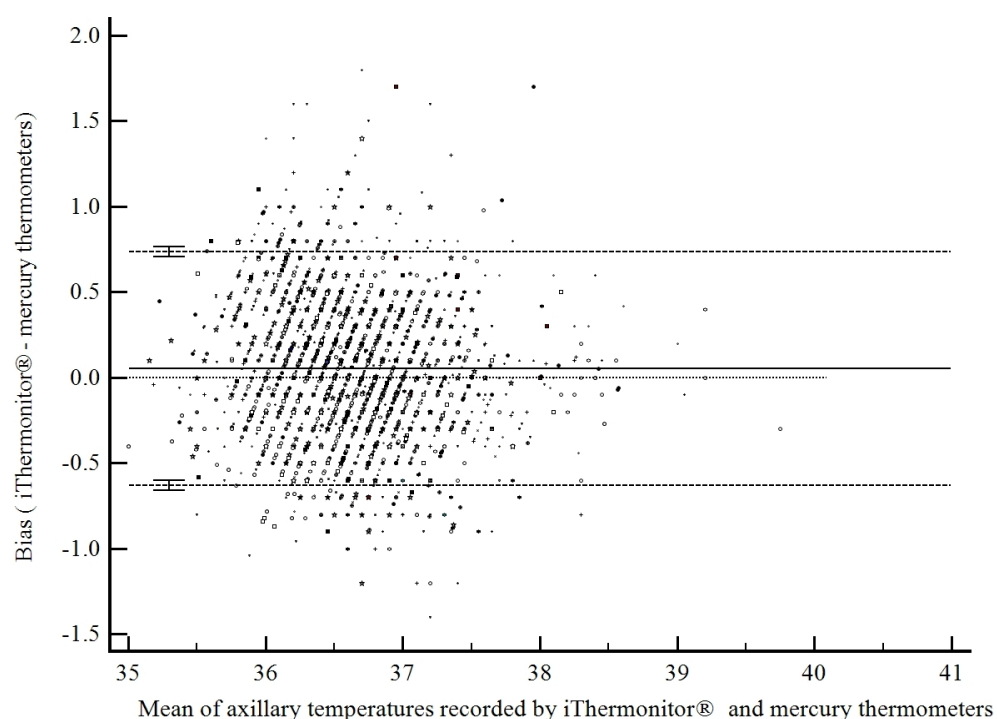

101x76mm (300 x 300 DPI)

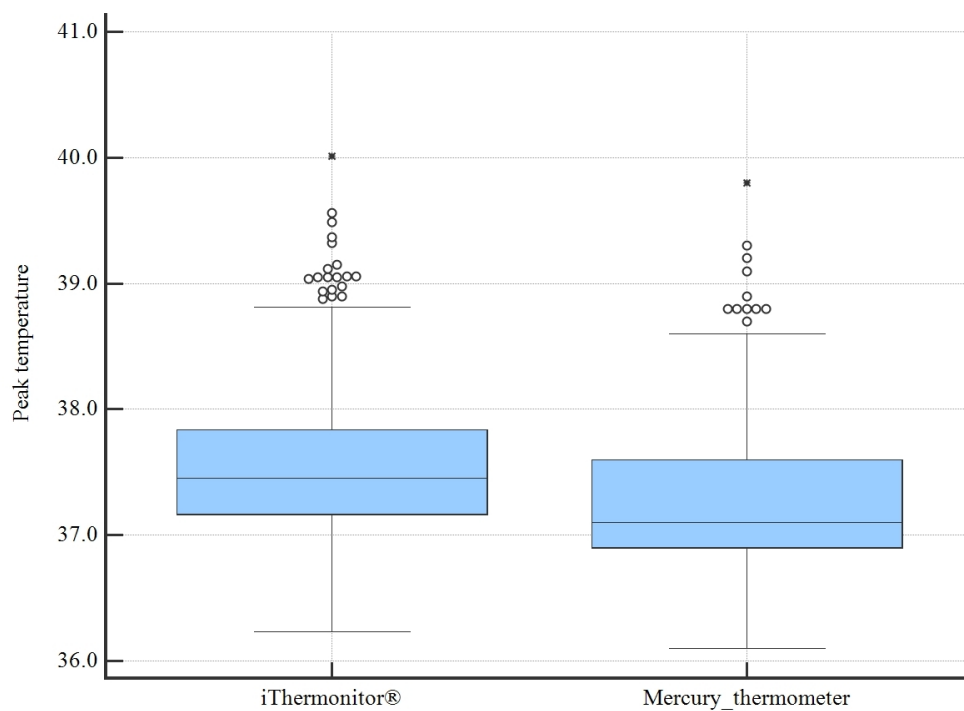

101x76mm (300 x 300 DPI)

## Supplementary Materials

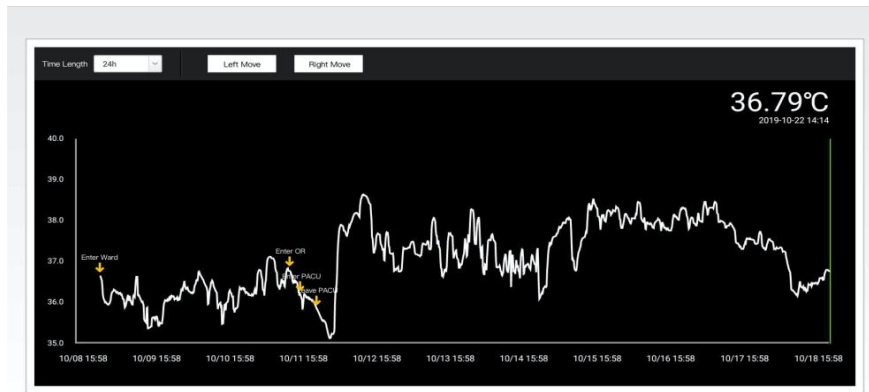

**Appendix figure 1** The temperature curve with time stamps across different clinical scenarios.

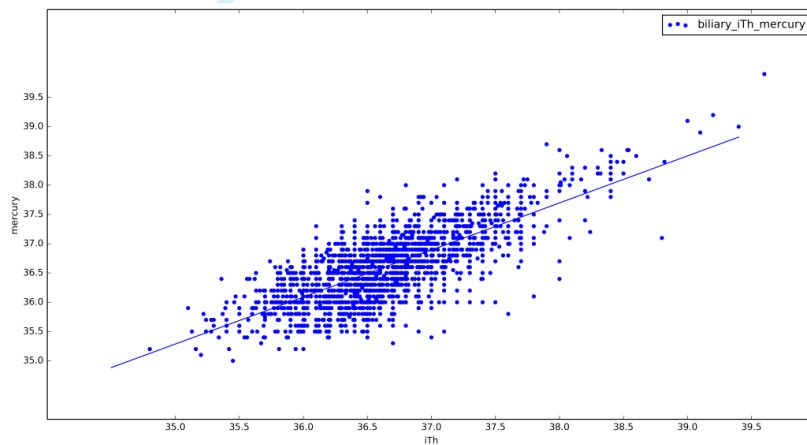

**Appendix figure 2** Scatter plot of iThermonitor<sup>®</sup> axillary temperatures (x-axis) against mercury thermometer temperatures (y-axis). Pearson's correlation coefficient  $r=0.755$ ,  $P<0.001$ .

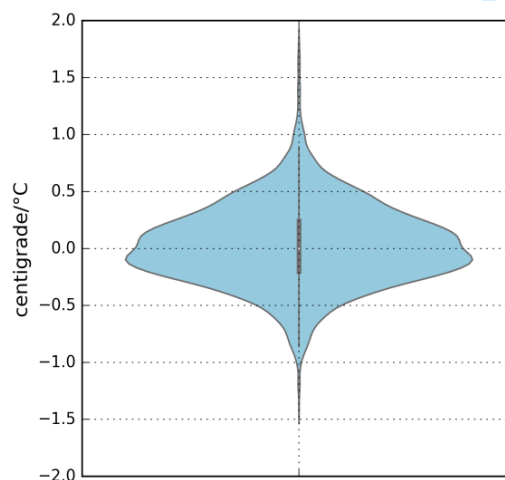

**Appendix figure 3** Distribution of the difference of axillary temperatures, calculated by iThermonitor<sup>®</sup> minus mercury thermometer.

**Appendix table 1** The questionnaire to evaluate the feasibility of the iThermonitor<sup>®</sup>  
(N=109)

| Selections                                               | Score | Patients` Options (%) |
|----------------------------------------------------------|-------|-----------------------|
| I felt very uncomfortable and could not bear to wear it. | 1     | 0 (0)                 |
| I felt slight discomfort, but it's tolerable.            | 2     | 21 (19.3)             |
| I didn't have noticeable feelings of wearing it.         | 3     | 81 (74.3)             |
| I felt comfortable with it.                              | 4     | 6 (5.5)               |
| I felt very comfortable with it.                         | 5     | 1 (0.9)               |

| Section & Topic          | No  | Item                                                                                                                                                   | Reported on page # |
|--------------------------|-----|--------------------------------------------------------------------------------------------------------------------------------------------------------|--------------------|
| <b>TITLE OR ABSTRACT</b> |     |                                                                                                                                                        |                    |
|                          | 1   | Identification as a study of diagnostic accuracy using at least one measure of accuracy (such as sensitivity, specificity, predictive values, or AUC)  | Page 2             |
| <b>ABSTRACT</b>          |     |                                                                                                                                                        |                    |
|                          | 2   | Structured summary of study design, methods, results, and conclusions (for specific guidance, see STARD for Abstracts)                                 | Page 2-3           |
| <b>INTRODUCTION</b>      |     |                                                                                                                                                        |                    |
|                          | 3   | Scientific and clinical background, including the intended use and clinical role of the index test                                                     | Page 4-5           |
|                          | 4   | Study objectives and hypotheses                                                                                                                        | Page 6             |
| <b>METHODS</b>           |     |                                                                                                                                                        |                    |
| <i>Study design</i>      | 5   | Whether data collection was planned before the index test and reference standard were performed (prospective study) or after (retrospective study)     | Page 6             |
| <i>Participants</i>      | 6   | Eligibility criteria                                                                                                                                   | Page 6             |
|                          | 7   | On what basis potentially eligible participants were identified (such as symptoms, results from previous tests, inclusion in registry)                 | Page 6             |
|                          | 8   | Where and when potentially eligible participants were identified (setting, location and dates)                                                         | Page 6             |
|                          | 9   | Whether participants formed a consecutive, random or convenience series                                                                                | Page 6             |
| <i>Test methods</i>      | 10a | Index test, in sufficient detail to allow replication                                                                                                  | Page 7-8           |
|                          | 10b | Reference standard, in sufficient detail to allow replication                                                                                          | Page 7-8           |
|                          | 11  | Rationale for choosing the reference standard (if alternatives exist)                                                                                  | Page 8             |
|                          | 12a | Definition of and rationale for test positivity cut-offs or result categories of the index test, distinguishing pre-specified from exploratory         | Page 10            |
|                          | 12b | Definition of and rationale for test positivity cut-offs or result categories of the reference standard, distinguishing pre-specified from exploratory | Page 10            |
|                          | 13a | Whether clinical information and reference standard results were available to the performers/readers of the index test                                 | Page 9             |
|                          | 13b | Whether clinical information and index test results were available to the assessors of the reference standard                                          | Page 9             |
| <i>Analysis</i>          | 14  | Methods for estimating or comparing measures of diagnostic accuracy                                                                                    | Page 9             |
|                          | 15  | How indeterminate index test or reference standard results were handled                                                                                | Page 10            |
|                          | 16  | How missing data on the index test and reference standard were handled                                                                                 | Page 11            |
|                          | 17  | Any analyses of variability in diagnostic accuracy, distinguishing pre-specified from exploratory                                                      | Page 13            |
|                          | 18  | Intended sample size and how it was determined                                                                                                         | Page 10            |
| <b>RESULTS</b>           |     |                                                                                                                                                        |                    |
| <i>Participants</i>      | 19  | Flow of participants, using a diagram                                                                                                                  | Page 11            |
|                          | 20  | Baseline demographic and clinical characteristics of participants                                                                                      | Page 11-12         |
|                          | 21a | Distribution of severity of disease in those with the target condition                                                                                 | Page 15            |
|                          | 21b | Distribution of alternative diagnoses in those without the target condition                                                                            | Page 15            |
|                          | 22  | Time interval and any clinical interventions between index test and reference standard                                                                 | Page 11            |
| <i>Test results</i>      | 23  | Cross tabulation of the index test results (or their distribution) by the results of the reference standard                                            | Page 16            |
|                          | 24  | Estimates of diagnostic accuracy and their precision (such as 95% confidence intervals)                                                                | Page 16            |
|                          | 25  | Any adverse events from performing the index test or the reference standard                                                                            | Page 17            |
| <b>DISCUSSION</b>        |     |                                                                                                                                                        |                    |
|                          | 26  | Study limitations, including sources of potential bias, statistical uncertainty, and generalisability                                                  | Page 21            |
|                          | 27  | Implications for practice, including the intended use and clinical role of the index test                                                              | Page 20            |
| <b>OTHER INFORMATION</b> |     |                                                                                                                                                        |                    |
|                          | 28  | Registration number and name of registry                                                                                                               | Page 22            |
|                          | 29  | Where the full study protocol can be accessed                                                                                                          | Page 22            |
|                          | 30  | Sources of funding and other support; role of funders                                                                                                  | Page 22            |

# STARD 2015

---

## AIM

STARD stands for “Standards for Reporting Diagnostic accuracy studies”. This list of items was developed to contribute to the completeness and transparency of reporting of diagnostic accuracy studies. Authors can use the list to write informative study reports. Editors and peer-reviewers can use it to evaluate whether the information has been included in manuscripts submitted for publication.

---

## EXPLANATION

A **diagnostic accuracy study** evaluates the ability of one or more medical tests to correctly classify study participants as having **atarget condition**. This can be a disease, a disease stage, response or benefit from therapy, or an event or condition in the future. A medical test can be an imaging procedure, a laboratory test, elements from history and physical examination, a combination of these, or any other method for collecting information about the current health status of a patient.

The test whose accuracy is evaluated is called **index test**. A study can evaluate the accuracy of one or more index tests. Evaluating the ability of a medical test to correctly classify patients is typically done by comparing the distribution of the index test results with those of the **reference standard**. The reference standard is the best available method for establishing the presence or absence of the target condition. An accuracy study can rely on one or more reference standards.

If test results are categorized as either positive or negative, the cross tabulation of the index test results against those of the reference standard can be used to estimate the **sensitivity** of the index test (the proportion of participants *with* the target condition who have a positive index test), and its **specificity** (the proportion *without* the target condition who have a negative index test). From this cross tabulation (sometimes referred to as the contingency or “2x2” table), several other accuracy statistics can be estimated, such as the positive and negative **predictive values** of the test. Confidence intervals around estimates of accuracy can then be calculated to quantify the statistical **precision** of the measurements.

If the index test results can take more than two values, categorization of test results as positive or negative requires a **test positivity cut-off**. When multiple such cut-offs can be defined, authors can report a receiver operating characteristic (ROC) curve which graphically represents the combination of sensitivity and specificity for each possible test positivity cut-off. The **area under the ROC curve** informs in a single numerical value about the overall diagnostic accuracy of the index test.

The **intended use** of a medical test can be diagnosis, screening, staging, monitoring, surveillance, prediction or prognosis. The **clinical role** of a test explains its position relative to existing tests in the clinical pathway. A replacement test, for example, replaces an existing test. A triage test is used before an existing test; an add-on test is used after an existing test.

Besides diagnostic accuracy, several other outcomes and statistics may be relevant in the evaluation of medical tests. Medical tests can also be used to classify patients for purposes other than diagnosis, such as staging or prognosis. The STARD list was not explicitly developed for these other outcomes, statistics, and study types, although most STARD items would still apply.

---

## DEVELOPMENT

This STARD list was released in 2015. The 30 items were identified by an international expert group of methodologists, researchers, and editors. The guiding principle in the development of STARD was to select items that, when reported, would help readers to judge the potential for bias in the study, to appraise the applicability of the study findings and the validity of conclusions and recommendations. The list represents an update of the first version, which was published in 2003.

More information can be found on <http://www.equator-network.org/reporting-guidelines/stard>.

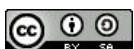

# BMJ Open

## Evaluation of a wearable wireless device with artificial intelligence, iThermonitor® WT705, for continuous temperature monitoring for patients in surgical wards: a prospective comparative study

|                                 |                                                                                                                                                                                                                                                                                                                                                                                                                                                                                                                                                                                                                          |
|---------------------------------|--------------------------------------------------------------------------------------------------------------------------------------------------------------------------------------------------------------------------------------------------------------------------------------------------------------------------------------------------------------------------------------------------------------------------------------------------------------------------------------------------------------------------------------------------------------------------------------------------------------------------|
| Journal:                        | <i>BMJ Open</i>                                                                                                                                                                                                                                                                                                                                                                                                                                                                                                                                                                                                          |
| Manuscript ID                   | bmjopen-2020-039474.R2                                                                                                                                                                                                                                                                                                                                                                                                                                                                                                                                                                                                   |
| Article Type:                   | Original research                                                                                                                                                                                                                                                                                                                                                                                                                                                                                                                                                                                                        |
| Date Submitted by the Author:   | 10-Oct-2020                                                                                                                                                                                                                                                                                                                                                                                                                                                                                                                                                                                                              |
| Complete List of Authors:       | Liu, Yuwei; Sichuan University West China Hospital, Department of general surgery<br>Liu, Changqing; Sichuan University West China Hospital, Operating room<br>Gao, Min; Sichuan University West China Hospital, Department of biliary surgery<br>Wang, Yan; Sichuan University West China Hospital, Department of biliary surgery<br>Bai, Yangjing; Sichuan University West China Hospital, Department of cardiac and macrovascular surgery<br>Xu, Ruihua; Sichuan University West China Hospital, Department of biliary surgery<br>Gong, Renrong; Sichuan University West China Hospital, West China School of Nursing |
| <b>Primary Subject Heading</b>: | Nursing                                                                                                                                                                                                                                                                                                                                                                                                                                                                                                                                                                                                                  |
| Secondary Subject Heading:      | Surgery                                                                                                                                                                                                                                                                                                                                                                                                                                                                                                                                                                                                                  |
| Keywords:                       | Health informatics < BIOTECHNOLOGY & BIOINFORMATICS, Adult surgery < SURGERY, Physiology < NATURAL SCIENCE DISCIPLINES, Telemedicine < BIOTECHNOLOGY & BIOINFORMATICS                                                                                                                                                                                                                                                                                                                                                                                                                                                    |
|                                 |                                                                                                                                                                                                                                                                                                                                                                                                                                                                                                                                                                                                                          |

SCHOLARONE™  
Manuscripts





I, the Submitting Author has the right to grant and does grant on behalf of all authors of the Work (as defined in the below author licence), an exclusive licence and/or a non-exclusive licence for contributions from authors who are: i) UK Crown employees; ii) where BMJ has agreed a CC-BY licence shall apply, and/or iii) in accordance with the terms applicable for US Federal Government officers or employees acting as part of their official duties; on a worldwide, perpetual, irrevocable, royalty-free basis to BMJ Publishing Group Ltd ("BMJ") its licensees and where the relevant Journal is co-owned by BMJ to the co-owners of the Journal, to publish the Work in this journal and any other BMJ products and to exploit all rights, as set out in our [licence](#).

The Submitting Author accepts and understands that any supply made under these terms is made by BMJ to the Submitting Author unless you are acting as an employee on behalf of your employer or a postgraduate student of an affiliated institution which is paying any applicable article publishing charge ("APC") for Open Access articles. Where the Submitting Author wishes to make the Work available on an Open Access basis (and intends to pay the relevant APC), the terms of reuse of such Open Access shall be governed by a Creative Commons licence – details of these licences and which [Creative Commons](#) licence will apply to this Work are set out in our licence referred to above.

Other than as permitted in any relevant BMJ Author's Self Archiving Policies, I confirm this Work has not been accepted for publication elsewhere, is not being considered for publication elsewhere and does not duplicate material already published. I confirm all authors consent to publication of this Work and authorise the granting of this licence.

1  
2  
3  
4 **Evaluation of a wearable wireless device with artificial intelligence,**  
5  
6 **iThermonitor® WT705, for continuous temperature monitoring for**  
7  
8 **patients in surgical wards: a prospective comparative study**  
9  
10

11  
12 Yuwei Liu,<sup>1,2</sup> Changqing Liu,<sup>3</sup> Min Gao,<sup>2</sup> Yan Wang,<sup>2</sup> Yangjing Bai,<sup>4</sup> Ruihua Xu,<sup>1, 2</sup>  
13  
14 Renrong Gong<sup>1,5</sup>  
15  
16

17  
18 <sup>1</sup> *West China School of Nursing, Sichuan University, Chengdu, P.R.China*  
19

20 <sup>2</sup> *Department of Biliary Surgery, West China Hospital of Sichuan University, Chengdu,*  
21 *P.R.China*  
22

23 <sup>3</sup> *Operating Room of Anesthesia Surgery Center, West China Hospital of Sichuan University,*  
24 *Chengdu, P.R.China*  
25

26 <sup>4</sup> *Department of Cardiac And Macrovascular Surgery, West China Hospital of Sichuan*  
27 *University, Chengdu, P.R.China*  
28

29 <sup>5</sup> *Department of Surgery, West China Hospital of Sichuan University, Chengdu, P.R.China*  
30  
31  
32  
33

34  
35 **Key words:** Monitoring, Physiologic; Body Temperature; Wearable Electronic  
36  
37  
38  
39  
40  
41  
42  
43  
44  
45  
46  
47  
48  
49  
50  
51  
52  
53  
54  
55  
56  
57  
58  
59  
60  
Devices

41 **Correspondence to**

42  
43 Renrong Gong; gongrenrong@wchscu.cn  
44

45  
46 RuihuaXu; xuruihua@wchscu.cn  
47  
48  
49  
50  
51  
52  
53  
54  
55  
56  
57  
58  
59  
60

## ABSTRACT

**Objectives:** To evaluate a new-generation non-invasive wireless axillary thermometer with artificial intelligence, iThermonitor<sup>®</sup> (WT705, Raiing Medical, Beijing, China), and to ascertain its feasibility for perioperative continuous body temperature monitoring in surgical patients.

**Setting:** Departments of Biliary Surgery and Operating Room and the post-anaesthesia care unit of a university teaching hospital in Chengdu, China.

**Participants:** A total of 526 adult surgical patients were consecutively enrolled.

**Design:** This was a prospective observational study. Axillary temperatures were continuously recorded with iThermonitor<sup>®</sup> throughout the whole perioperative period. The temperatures of the contralateral armpit were measured with mercury thermometers at 8:00, 12:00, 16:00, and 20:00 every day and were used as references.

**Outcome measures:** The outcomes were the accuracy and precision of the temperatures measured with iThermonitor<sup>®</sup>, the validity to detect fever, and the feasibility of continuous wear. Pairs of temperatures were evaluated with Student's *t*-test, Pearson's correlation, and repeated-measures Bland-Altman plot.

**Results:** A total of 3621 pairs of body temperatures were obtained. The temperatures measured with iThermonitor<sup>®</sup> agreed with those measured with the mercury thermometers overall, with a mean difference of  $0.03^{\circ}\text{C} \pm 0.36^{\circ}\text{C}$  and a moderate correlation ( $r=0.755$ ,  $P<0.001$ ). The 95% limits of agreement (95% LoA) ranged from  $-0.63^{\circ}\text{C}$  to  $0.73^{\circ}\text{C}$ , with 5.11% of the differences outside the 95% LoA. The intraclass correlation coefficient was 0.753. Continuous temperature monitoring captured more

1  
2  
3  
4 fevers than intermittent observation (117/526 vs. 91/526,  $P<0.001$ ), detected fever up  
5  
6 to 4.35 hours earlier, and captured a higher peak temperature ( $0.29^{\circ}\text{C}\pm 0.27^{\circ}\text{C}$ , 95%  
7  
8 confidence interval: 0.26-0.31). All subjects felt that wearing iThermonitor<sup>®</sup> was more  
9  
10 or less comfortable and did not affect their daily activities.  
11  
12

13  
14 **Conclusions:** iThermonitor<sup>®</sup> is promising for continuous remote temperature  
15  
16 monitoring in surgical patients. However, further developments are still needed to  
17  
18 improve the precision of this device, especially for temperature detection in  
19  
20 underweight patients and those with lower body temperature.  
21  
22  
23

### 24 25 26 **Strengths and limitations of this study**

- 27  
28 ■ A wearable wireless device with artificial intelligence, iThermonitor<sup>®</sup> WT705,  
29  
30 was evaluated for continuous temperature monitoring in surgical patients.  
31  
32
- 33  
34 ■ Axillary temperature was remotely monitored in different clinical scenarios  
35  
36 throughout the whole perioperative period.  
37  
38
- 39  
40 ■ More algorithm training and developments are still needed to improve the  
41  
42 precision of this device, especially for temperature detection in underweight  
43  
44 patients and those with lower body temperature.  
45  
46
- 47  
48 ■ Only axillary temperatures were detected for the evaluation of iThermonitor<sup>®</sup>.  
49  
50
- 51  
52 ■ The validity of the device was not tested in the intensive care unit (ICU) or in  
53  
54 patients with compromised haemodynamics which might change skin perfusion  
55  
56 and temperature.  
57  
58  
59  
60

## INTRODUCTION

Body temperature is one of the most foundational vital signs of patients. Surgical patients are typically exposed to cold environments, administrations of unwarmed intravenous fluids, bacterial invasions and anaesthetic drugs that may impair the thermoregulatory system,<sup>1</sup> leading to perturbations in body temperature. Accurately monitoring body temperature is essential for preventing hypothermia and detecting infectious complications in surgical patients.<sup>2,3</sup>

No ideal device has been developed yet<sup>4</sup> to continuously monitor body temperature across different clinical settings with satisfactory accuracy, availability and affordability.<sup>5</sup> Peripheral thermometers measuring temperature from the tympanic membrane, temporal artery, oral cavity, forehead, or other parts are not considered to be stable or accurate enough.<sup>6-8</sup> Inserts of a temperature probe to the oesophageal, pulmonary artery, nasopharynx, rectum, or bladder can precisely and continuously detect the core temperature,<sup>9</sup> but these invasive devices increase the risk of infection and are only used for patients in intensive care units (ICU) and surgical patients under anaesthesia when necessary.<sup>10, 11</sup> Currently, there is still an urgent need for thermometers that accurately and continuously monitor body temperature in clinical practice.

Wearable technology is changing the way that body temperatures have been measured and clinical care has been performed.<sup>12</sup> In recent years, several wireless dermal wearable thermometers have increased the feasibility of continuous body temperature monitoring outside of the critical care setting.<sup>13</sup> However, only a small proportion of

1  
2  
3  
4 wearable devices have a Conformité Européenne (CE) marking class II or above, or  
5  
6 approval from the US Food and Drug Administration (FDA) as medical devices.<sup>14</sup>  
7  
8

9 There are still few options with convincing evidence to support their usage in clinical  
10  
11 environments.<sup>15</sup> Wearable devices reflecting skin temperatures have been proved to  
12  
13 have strong bias and poor correlations with oral temperatures,<sup>16</sup> or tympanic  
14  
15 temperatures.<sup>17</sup> Zsuzsanna Balla *et al.*<sup>13</sup> found seven wireless dermal thermometers  
16  
17 reflecting core temperatures through internet searching, and tested four (FeverSmart,  
18  
19 iThermonitor<sup>®</sup> WT701, Quest Temp Sitter, and Thermochron iButton) that were  
20  
21 commercially available. The results indicated that they were not reliable or accurate  
22  
23 enough for most types of clinical studies, although the iThermonitor<sup>®</sup> WT701 system  
24  
25 had the least unsatisfactory correlation to rectal thermometers. Moreover, surgical  
26  
27 patients were typically transferred between multiple units of care (i.e., surgical ward,  
28  
29 operating room, post-anaesthesia care unit). Because of the challenges during scenario  
30  
31 changes, such as tissue perfusion, physical activity, length of wearing time, and  
32  
33 different compliances between awake patients and those under anaesthesia, it remains  
34  
35 unclear whether these devices are capable of continuous temperature monitoring  
36  
37 across different clinical scenarios. In addition, battery life and internal storage space  
38  
39 limit their application.  
40  
41  
42  
43  
44  
45  
46  
47  
48  
49

50 A new generation of the non-invasive wireless axillary thermometer iThermonitor<sup>®</sup>  
51  
52 WT705 was developed with advanced versions of machine learning algorithms for  
53  
54 continuous remote monitoring of body temperature (including core temperature) in  
55  
56 different clinical settings. Although the previous version of iThermonitor<sup>®</sup> has been  
57  
58  
59  
60

1  
2  
3  
4 reported to accurately represent core temperature (distal oesophagus temperature) in  
5  
6 patients under anaesthesia,<sup>18</sup> the performance of the latest version has not yet been  
7  
8 tested in surgical wards. Therefore, we conducted a prospective study to assess the  
9  
10 accuracy and feasibility of iThermonitor<sup>®</sup> WT705 for testing body temperature in  
11  
12 awake patients in surgical wards, and its potential for continuous monitoring of body  
13  
14 temperature throughout the whole perioperative period at real clinical settings.  
15  
16  
17  
18  
19  
20  
21

## 22 **METHODS**

### 23 **Study design, subjects, and setting**

24  
25 This was a prospective comparative descriptive study to evaluate iThermonitor<sup>®</sup> for  
26  
27 continuous temperature monitoring by comparing it with mercury thermometers.  
28  
29 Patients admitted to the Department of Biliary Surgery at West China Hospital of  
30  
31 Sichuan University were consecutively recruited for this study, from August to  
32  
33 December 2019. The inclusion criterion was that the patient signed an informed  
34  
35 consent form. Patients with any impediment to wearing the iThermonitor<sup>®</sup> in their  
36  
37 axillae were excluded. Finally, 526 patients were enrolled, and all signed informed  
38  
39 written consent forms.  
40  
41  
42  
43  
44  
45  
46  
47

### 48 **Instruments**

49  
50 The study instruments were as follows: (1) Wireless non-invasive dermal  
51  
52 thermometer iThermonitor<sup>®</sup> (model WT705, Raiing Medical Company, Beijing,  
53  
54 China), with an accuracy of  $\pm 0.1^{\circ}\text{C}$  ( $5^{\circ}\text{C}$ - $40^{\circ}\text{C}$ ). This is a battery-operated reusable  
55  
56 electronic device with 30 days of battery life. The FDA approved it as a class II  
57  
58  
59  
60

1  
2  
3  
4 medical device. iThermonitor<sup>®</sup> was securely attached to the axilla (shaved if necessary)  
5  
6 of patients with adhesive tape provided by the manufacturer (Figure 1). iThermonitor<sup>®</sup>  
7  
8  
9 WT705 was equipped with a more powerful chip developed from the previous version  
10  
11 of WT701, which enables it to store more data with time and clinical scenario stamps.  
12  
13  
14 The sensor recorded the axillary temperature once every 4 seconds and then  
15  
16 transmitted the raw data wirelessly to its associated signal repeater (cHub, Raiing  
17  
18 Medical Company, Beijing, China). The cHub was attached to the bedside, with two  
19  
20 versions of patented machine learning algorithms running inside. One version was for  
21  
22 patients in the operating room to estimate core temperatures based on axillary  
23  
24 temperatures. The other version was for patients in the ward and/or home to test the  
25  
26 axillary temperatures, as used in the present study. The algorithms were designed to  
27  
28 improve the accuracy of temperature tests by adjusting for possible interference,  
29  
30 including anaesthetics, daily activities, body posture changes, loose adhesive tape  
31  
32 and/or ambient temperature, which could be preset as needed, together with the data  
33  
34 output frequency. The average temperature per minute was transmitted wirelessly via  
35  
36 Bluetooth or WiFi to the central computer in the nurse station. The dynamic  
37  
38 temperature curves of all patients were visualized on the screen (online supplementary  
39  
40 appendix Figure 1). All iThermonitor<sup>®</sup> sensors were proofread for accuracy according  
41  
42 to the manufacturer's standard before use. (2)Mercury-in-glass thermometers (Riyue  
43  
44 Medical Company, Chongqing, China) with an accuracy of  $\pm 0.1^{\circ}\text{C}$ , over the range of  
45  
46  $35^{\circ}\text{C}$ - $42^{\circ}\text{C}$ . Mercury thermometers were calibrated each week by comparison to a  
47  
48 high-precision industrial mercury thermometer (HX-290, Chuangji Instruments  
49  
50  
51  
52  
53  
54  
55  
56  
57  
58  
59  
60



1  
2  
3  
4 Company, Hebei, China). Mercury thermometers with temperature deviations greater  
5  
6 than 0.2°C were not used. iThermonitor® could be tested as a substitute choice for  
7  
8 mercury thermometers since efforts have been made by countries to find alternative  
9  
10 methods to mercury thermometers.  
11  
12  
13  
14

### 15 **Data collection**

16  
17 Age, sex, and body mass index (BMI) were extracted from the medical records. The  
18  
19 iThermonitor® sensor was attached to the dried and cleaned skin in the armpit region  
20  
21 on the first day of admission to continuously record the body temperature throughout  
22  
23 the whole perioperative period, except during a computed tomography (CT) scan or a  
24  
25 shower. The axillary skin was checked by registered nurses every day for local skin  
26  
27 allergies or other adverse reactions. Patients were asked to complete a questionnaire  
28  
29 (online supplementary appendix Table 1) to evaluate the tolerability of iThermonitor®  
30  
31 on the day of discharge.  
32  
33  
34  
35  
36  
37  
38

39 Temperature was measured with mercury thermometers at 8:00  
40  
41 ante meridiem (AM), 12:00 AM, 16:00 post meridiem (PM) and 20:00 PM every day,  
42  
43 the 8:00 AM and 16:00 PM measurements were selected and paired with the  
44  
45 temperatures measured with iThermonitor® because two specially trained registered  
46  
47 nurses were assigned to take these measurements during the day shift. One nurse  
48  
49 measured the temperature with a mercury thermometer and recorded it together with  
50  
51 the time of the measurement. The other nurse read the temperature detected with  
52  
53 iThermonitor® of the same patient at the same time from the central monitoring station.  
54  
55  
56  
57  
58  
59  
60 Meanwhile, activity, state of consciousness, and armpit sweating were assessed and

1  
2  
3  
4 recorded.

5  
6  
7 Once the difference between the concurrent temperatures measured with the two  
8  
9 devices was over 1°C, the measurement was repeated immediately with a mercury  
10  
11 thermometer, and the fit of iThermonitor® was checked. When improper  
12  
13 measurements or/and fit were confirmed, the corresponding sets of data were  
14  
15 excluded. Only the differences were confirmed to truly exist, and the data were  
16  
17 included for further analyses.  
18  
19  
20

## 21 22 **Main end points**

23  
24 The following endpoints were evaluated:

25  
26 - Accuracy. The accuracy was expressed as the mean of the difference (also called  
27  
28 bias) and the standard deviation, as calculated by the temperature recorded with  
29  
30 iThermonitor® minus that recorded with a mercury thermometer. A priori, an absolute  
31  
32 difference of 0.5°C was considered to be clinically acceptable.<sup>18 19</sup>  
33  
34

35  
36 - Precision. Precision (also called reliability) was tested by the 95% limits of  
37  
38 agreement (95% LoA) and intraclass correlation coefficient (ICC). As in previous  
39  
40 studies,<sup>17 18</sup> the 95% LoA within  $\pm 0.5^\circ\text{C}$  and ICC greater than 0.7 were considered  
41  
42 well accepted precision.  
43  
44

45  
46 - Validity. Taking recordings of mercury thermometers as references, validity of  
47  
48 the iThermonitor® was evaluated by the ability to detect fever. Axillary temperatures  
49  
50 of 38°C were considered a cut-off value of fever, according to the Brighton  
51  
52 Collaboration Fever Working Group's definition.<sup>20</sup> The peak temperatures recorded  
53  
54 by the two methods were also compared. In addition, the first time iThermonitor®  
55  
56 indicated body temperatures exceeding 38°C (lasting at least 5 min) was compared  
57  
58  
59  
60

1  
2  
3  
4 with the first time for a mercury thermometer to detect fever.

5 - Feasibility. The feasibility of continuous temperature monitoring was assessed  
6 with a comfort score ([online supplementary appendix Table 1](#)) and possible adverse  
7 events. Any adverse events, such as skin blisters or ulcers caused by iThermonitor<sup>®</sup>,  
8 or the breaking of a mercury thermometer, were included.  
9  
10  
11  
12  
13  
14  
15  
16

## 17 **Statistics**

18  
19 Means and standard deviations of temperatures were calculated for iThermonitor<sup>®</sup> and  
20 mercury thermometers. Quantitative data are expressed as the mean±standard  
21 deviation. Student's *t*-test for matched pairs, Pearson's correlation analysis and  
22 repeated-measures Bland-Altman plot were used to evaluate the relationship between  
23 the two sets of temperatures. The calculations of the Bland-Altman plot with multiple  
24 measurements per subject were performed as described by Bland *et al.*<sup>21</sup>, and the  
25 confidence intervals of 95% LoA were estimated as described by Zou.<sup>22</sup> Possible  
26 factors associated with the accuracy were estimated by multiple linear regression  
27 analysis, in which the differences between iThermonitor<sup>®</sup> and mercury thermometer  
28 readings were considered the dependent variable and all the factors considered were  
29 the explanatory variables.  $P < 0.05$  was considered statistically significant. Data were  
30 analysed with Python (Version 3.5.1), and MedCalc (Version 19.1.3) software for  
31 repeated-measures Bland-Altman plot.  
32  
33  
34  
35  
36  
37  
38  
39  
40  
41  
42  
43  
44  
45  
46  
47  
48  
49  
50  
51  
52

## 53 **Sample size considerations**

54  
55 The sample size module for the Bland-Altman plot of MedCalc software was used to  
56 estimate the sample size. An expected mean of differences was set as 0.03°C, with a  
57  
58  
59  
60

1  
2  
3  
4 standard deviation of 0.23°C, according to our previous pilot study. This calculation  
5  
6 set a maximally allowed difference of 0.5°C (usually recognized as clinically  
7  
8 significant),<sup>17 18</sup> a type I error rate (Alpha) of 0.05, and a power of 80%. Finally, 3292  
9  
10 pairs of data were deemed sufficient to detect a difference between iThermonitor® and  
11  
12 the mercury thermometers.  
13  
14  
15

### 16 17 **Patient and public involvement**

18  
19 No patients or members of the public were involved in the design of this study, the  
20  
21 implementation of the study, or the dissemination of the results.  
22  
23  
24  
25

## 26 27 **RESULTS**

### 28 29 **Characteristics of the patients**

30  
31 A total of 526 patients were enrolled. All of them completed the study and were  
32  
33 included in the final analysis. No missing values needed to be processed. Each patient  
34  
35 wore iThermonitor® temperature sensor from admission to discharge, with an average  
36  
37 of 3.37±2.95 days. The cumulative monitoring duration was 1768 days. Temperature  
38  
39 curves with time stamps across different clinical scenarios were recorded for each  
40  
41 patient (online supplementary appendix Figure 1). Among the 526 patients, there were  
42  
43 197 (37.5%) males and 329 (62.5%) females, with an average age of 53.47±14.46  
44  
45 years (over the range of 15-86 years). Patients were allowed to ambulate inside the  
46  
47 hospital although most patients remained at their bedsides for daily activities, due to  
48  
49 their surgeries. The room temperature was 24.2°C±1.3°C (22°C-26°C), maintained by  
50  
51 the central air conditioning system in the hospital. Demographic characteristics are  
52  
53  
54  
55  
56  
57  
58  
59  
60

shown in Table 1.

**Table 1** Description of the patients

| Variable                                                                     | Summary                  |
|------------------------------------------------------------------------------|--------------------------|
| <b><i>Patient Characteristics (N<sub>1</sub>=526)</i></b>                    |                          |
| Age (years)                                                                  | 53.47±14.46 (15-86)      |
| Sex                                                                          |                          |
| Male (%)                                                                     | 197 (37.5%)              |
| Female (%)                                                                   | 329 (62.5%)              |
| BMI (kg/m <sup>2</sup> )                                                     | 23.21±3.09 (15.21-37.78) |
| Average monitor duration (days)                                              | 3.37±2.95 (1-22)         |
| Cumulative monitor duration (days)                                           | 1768                     |
| <b><i>Patient status when measuring temperature (N<sub>2</sub>=3621)</i></b> |                          |
| Mobility                                                                     |                          |
| Bedridden                                                                    | 3490 (96.38%)            |
| Off-bed activities                                                           | 131 (3.62%)              |
| Consciousness                                                                |                          |
| Awake                                                                        | 3572 (98.65%)            |
| Sleep                                                                        | 49 (1.35%)               |
| Sweating in the axilla                                                       | 26 (0.72%)               |

Data are presented as n (%) for categorical variables or the mean±SD for continuous variables. Abbreviations: BMI, body mass index, N<sub>1</sub>: number of patients, N<sub>2</sub>: number of paired temperature data sets.

### Accuracy and precision of iThermonitor®

A total of 3621 pairs of body temperatures were obtained. The mean temperature measured with iThermonitor® was 36.61°C±0.49°C, ranging from 34.8°C to 39.6°C, while the mean temperature measured with the mercury thermometers was 36.58°C±0.52°C, ranging from 35.0°C to 39.9°C. The mean of difference (bias) between the two methods was 0.03±0.35°C, ranging from -1.40°C to 1.80°C. The

biases within  $\pm 0.5^{\circ}\text{C}$ , the clinically acceptable standard defined by a priori, accounted for 87.68%, while 99.17% were within  $\pm 1.0^{\circ}\text{C}$ . A scatter plot shows a relatively strong linear correlation ( $r=0.755$ ,  $P<0.001$ ) between the two groups of temperatures (online supplementary appendix Figure 2). The Bland-Altman plot shows that the 95% LoA were broader than the predefined range, with the upper limit at  $0.73^{\circ}\text{C}$ , and the lower limit at  $-0.63^{\circ}\text{C}$ . Meanwhile, 5.11% (185/3621) of the points were outside the 95% LoA (Figure 2). The ICC was 0.753, indicating that the temperatures measured by the two methods moderately agreed overall.

### Factors associated with the difference between the two methods

Possible factors associated with the difference in readings between iThermonitor<sup>®</sup> and the mercury thermometers were evaluated by the multiple linear regression model (Table 2). Readings of mercury thermometers, BMI, and male sex were negatively correlated with the difference. Age, mobility, consciousness, length of wearing, and sweating in the axilla were not significantly associated with the difference.

**Table 2** Relationships of considered factors with the differences between iThermonitor<sup>®</sup> temperatures and mercury thermometer temperatures \*

| Factor considered                           | <i>B</i> | 95% CI          | <i>B</i> <sub>s</sub> | <i>t</i> | <i>P</i> value |
|---------------------------------------------|----------|-----------------|-----------------------|----------|----------------|
| Reading of mercury thermometers             | -0.295   | -0.315 : -0.275 | -0.433                | -28.737  | 0.000          |
| Sex (female vs. male)                       | -0.090   | -0.111 : -0.069 | -0.126                | -8.453   | 0.000          |
| BMI (kg/m <sup>2</sup> )                    | -0.013   | -0.016 : -0.009 | -0.111                | -7.399   | 0.000          |
| Age (year)                                  | 0.001    | 0.000 : 0.001   | 0.028                 | 1.870    | 0.062          |
| Length of wearing (day)                     | 0.001    | -0.003 : 0.003  | -0.002                | -0.130   | 0.897          |
| Mobility (bedridden vs. off-bed activities) | -0.020   | -0.075 : 0.034  | -0.011                | -0.728   | 0.467          |

|                                 |        |                |        |        |       |
|---------------------------------|--------|----------------|--------|--------|-------|
| Sweating in the axilla          | 0.117  | -0.005 : 0.238 | 0.028  | 1.884  | 0.060 |
| Consciousness (sleep vs. awake) | -0.021 | -0.110 : 0.067 | -0.007 | -0.466 | 0.641 |

Estimated by multiple linear regression analysis with the dependent variable as the difference of iThermonitor<sup>®</sup> temperatures minus mercury thermometer temperatures, with all the factors entered into the regression. *B*, linear regression coefficient. 95% CI, 95% confidence interval for linear regression coefficient. *B<sub>s</sub>*, standardized coefficient. \*Squared variation coefficient  $R^2=0.215$ ,  $F=123.474$ ,  $P<0.001$ .

The effects of the associated factors were further evaluated for the differences between iThermonitor<sup>®</sup> temperatures and mercury thermometer temperatures (Table 3). The differences were significant when the readings of the mercury thermometers were below 36.0°C or  $\geq 38.0^\circ\text{C}$ , but not significant between 36.0°C and 37.9°C. Regarding the effects of sex, the iThermonitor<sup>®</sup> readings compared to the mercury thermometer readings were significantly lower in male subjects but higher in female subjects. In addition, there were significant differences in patients with BMI < 18.5 kg/m<sup>2</sup> or ranging from 18.5 kg/m<sup>2</sup> to 23.9 kg/m<sup>2</sup>, but not in those with BMI ranging from 24.0 kg/m<sup>2</sup> to 27.9 kg/m<sup>2</sup> or  $\geq 28.0$  kg/m<sup>2</sup>.

**Table 3** The effects of associated factors on the temperature differences calculated with iThermonitor<sup>®</sup> readings minus mercury thermometer readings.

| Factors                          | N*   | iThermonitor <sup>®</sup><br>(°C) | Mercury<br>Thermometer(°C) | Bias (°C)  | 95% CI of<br>Bias | t      | P†    |
|----------------------------------|------|-----------------------------------|----------------------------|------------|-------------------|--------|-------|
| Readings of mercury thermometers |      |                                   |                            |            |                   |        |       |
| Hypothermia (<36.0°C)            | 275  | 36.09±0.40                        | 35.71±0.18                 | 0.38±0.40  | 0.33 : 0.43       | 15.839 | 0.000 |
| Normal (36.0-37.9°C)             | 3285 | 36.63±0.42                        | 36.62±0.42                 | 0.01±0.33  | -0.01 : 0.02      | 0.979  | 0.327 |
| Fever (≥38.0°C)                  | 61   | 38.11±0.54                        | 38.27±0.36                 | -0.17±0.35 | -0.26 : -0.08     | -3.682 | 0.000 |
| Sex                              |      |                                   |                            |            |                   |        |       |
| Male                             | 1480 | 36.57±0.45                        | 36.60±0.49                 | -0.03±0.35 | -0.05 : -0.02     | -3.610 | 0.000 |
| Female                           | 2141 | 36.64±0.51                        | 36.57±0.54                 | 0.08±0.35  | 0.06 : 0.09       | 10.003 | 0.000 |
| BMI(kg/m <sup>2</sup> )          |      |                                   |                            |            |                   |        |       |
| Low (<18.5)                      | 187  | 36.74±0.42                        | 36.60±0.47                 | 0.14±0.34  | 0.09 : 0.19       | 5.368  | 0.000 |
| Normal (18.5-23.9)               | 2156 | 36.66±0.50                        | 36.63±0.53                 | 0.04±0.34  | 0.02: 0.05        | 4.869  | 0.000 |
| Overweight (24.0-27.9)           | 1018 | 36.51±0.46                        | 36.50±0.50                 | 0.01±0.36  | -0.02 : 0.03      | 0.653  | 0.514 |
| Obese (≥28.0)                    | 260  | 36.51±0.45                        | 36.50±0.46                 | 0.01±0.43  | -0.04 : 0.07      | 0.529  | 0.598 |
| Total                            | 3621 | 36.61±0.49                        | 36.58±0.52                 | 0.03±0.35  | 0.02: 0.04        | 5.326  | 0.000 |

\* Number of paired temperature data sets. †Estimated by Student's *t* test for matched pairs.



### Comparisons of the two methods in detecting fever

Among the 526 patients, 117 were detected to have fever by continuous recordings with iThermonitor<sup>®</sup>, while only 91 patients were detected by intermittent readings with mercury thermometers (chi-square test for paired sample,  $P < 0.001$ ). A total of 124 patients were observed to have fevers with iThermonitor<sup>®</sup> or the mercury thermometers, and 84 subjects were observed by both methods.

### Comparisons of average peak temperatures

The average peak temperature captured by intermittent measurements with mercury thermometers was  $37.26^{\circ}\text{C} \pm 0.56^{\circ}\text{C}$ , whereas continuous monitoring with iThermonitor<sup>®</sup> detected a higher peak temperature of  $37.55^{\circ}\text{C} \pm 0.59^{\circ}\text{C}$ . A mild but statistically significant difference of  $0.29^{\circ}\text{C} \pm 0.27^{\circ}\text{C}$  (range from  $-0.45^{\circ}\text{C}$  to  $1.26^{\circ}\text{C}$ , 95% CI:  $0.26^{\circ}\text{C}$ - $0.31^{\circ}\text{C}$ ) was noted between the peak temperatures recorded by the two methods (Figure 3).

### Comparison of the earliest time to detect fevers

Continuous monitoring with iThermonitor<sup>®</sup> detected fevers earlier than intermittent measurement with mercury thermometers. A mean time interval of 4.35 hours was observed, with a minimum difference of -0.92 hours and a maximum difference of 25.34 hours.

### Feasibility of continuous temperature monitoring

During 1768 monitoring days, 4.37% (23/526) of the patients complained of slight

1  
2  
3  
4 itching during the wearing period. Local skin redness was observed in two patients  
5  
6 but resolved after iThermonitor<sup>®</sup> was moved to the contralateral axilla. A comfort  
7  
8 score from 1 to 5 was used to evaluate the feasibility of wearing iThermonitor<sup>®</sup>, with  
9  
10 1 meaning most uncomfortable and intolerable and 5 meaning very comfortable. Of  
11  
12 the 109 patients enrolled in August and September 2019, 21 selected a score of 2, 81  
13  
14 selected a score of 3, six selected a score of 4, and one selected a score of 5. All  
15  
16 subjects felt that wearing iThermonitor<sup>®</sup> was more or less comfortable and did not  
17  
18 affect their daily activities, indicating acceptable compliance of iThermonitor<sup>®</sup>.  
19  
20  
21  
22  
23  
24  
25  
26

## 27 **DISCUSSION**

28  
29 This was a prospective study to evaluate the performance of iThermonitor<sup>®</sup> WT705, a  
30  
31 wireless dermal temperature sensor, for continuous temperature monitoring in surgical  
32  
33 patients. iThermonitor<sup>®</sup> was selected because its performance had not been tested  
34  
35 before for continuous temperature monitoring in surgical patients, although it has  
36  
37 been one of the best performing devices among the available wireless dermal  
38  
39 thermometers due to its relatively high sensitivity and robustness in reflecting core  
40  
41 temperature.<sup>13</sup>  
42  
43  
44  
45  
46  
47

### 48 **Principal findings in accuracy and precision**

49  
50 iThermonitor<sup>®</sup> was compared with mercury thermometers. An overall small bias  
51  
52 (0.03°C±0.35°C, Table 3) and moderate correlation (Figure 2) were observed between  
53  
54 the two devices. Nevertheless, the analysis of 95% LoA indicated that the  
55  
56 comparisons with a bias less than ±0.5°C only accounted for 87.68%. This  
57  
58  
59  
60

1  
2  
3  
4 discrepancy was shown to be associated with the readings of the mercury  
5  
6 thermometers, sex and BMI. The largest bias ( $0.38^{\circ}\text{C}\pm 0.40^{\circ}\text{C}$ ) existed when the  
7  
8 readings of the mercury thermometers were below  $36^{\circ}\text{C}$ , with the readings of  
9  
10 iThermonitor<sup>®</sup> higher than those of the mercury thermometers (Table 3). Errors might  
11  
12 exist in manual measurements with mercury thermometers if the patient did not  
13  
14 maintain the proper measurement posture for enough time, leading to false body  
15  
16 temperature readings below  $36^{\circ}\text{C}$ . Stricter supervision and repeated measurements  
17  
18 may improve the results when the readings of mercury thermometers are below  $36^{\circ}\text{C}$ .  
19  
20 On the other hand, the temperature output of iThermonitor<sup>®</sup> may also be inaccurate,  
21  
22 but it is difficult to distinguish which device, or both, is the main cause of the  
23  
24 deviation. Moreover, not every reading of the mercury thermometers was  
25  
26 double-checked. This might also lead to biases. In addition, a significantly larger bias  
27  
28 was also noticed in underweight patients ( $\text{BMI} < 18.5 \text{ kg/m}^2$ ), but no significant  
29  
30 differences were observed in overweight or obese patients (Table 3). This result  
31  
32 supports the earlier findings of Rubia-Rubia<sup>23</sup>, who tested four axillary thermometers  
33  
34 and found that the difference in readings between axillary thermometers and  
35  
36 pulmonary artery temperatures increased with decreasing weight. A possible  
37  
38 explanation is that underweight patients might have difficulty having thermometers  
39  
40 properly attached to the axilla, leading to errors in the readings of axillary  
41  
42 thermometers. Moreover, larger biases were observed in female patients (Table 3).  
43  
44 Evidence has indicated that there are sex differences in thermoregulatory mechanisms.  
45  
46 Lu *et al*<sup>24</sup> reported higher oral temperatures in older women than in men. Rubia-Rubia  
47  
48  
49  
50  
51  
52  
53  
54  
55  
56  
57  
58  
59  
60

1  
2  
3  
4 *et al*<sup>23</sup> found that male sex increased the bias between temperatures measured by  
5  
6 digital axillary thermometer and core temperatures, although they were unable to find  
7  
8 a satisfactory explanation.  
9

### 10 11 **Compared to similar studies**

12  
13  
14 Different reference standards and algorithm versions have resulted in inconsistent  
15  
16 accuracy of iThermonitor<sup>®</sup> in previous reports. Pei *et al.*<sup>18</sup> tested the intraoperative  
17  
18 version of iThermonitor<sup>®</sup> WT701, and found that axillary temperature recordings well  
19  
20 represented core temperatures in adults under anaesthesia with a mean difference of  
21  
22 only 0.14°C±0.26°C (oesophageal minus axillary) and 95% LoA from -0.38°C to  
23  
24 0.66°C. It was also reported that iThermonitor<sup>®</sup> WT701 rendered lower average  
25  
26 temperatures than rectal temperatures (bias -0.77°C±0.53°C).<sup>13</sup> In addition,  
27  
28 iThermonitor<sup>®</sup> was highly easy to use to continuously monitor children's body  
29  
30 temperatures at home.<sup>25</sup> In the present study, the novel version of iThermonitor<sup>®</sup>  
31  
32 WT705 was selected and the algorithms were preset for ward/home use. The results  
33  
34 demonstrated that iThermonitor<sup>®</sup> could be used to continuously monitor temperatures  
35  
36 in surgical patients although improvements are still needed. Moreover, all subjects in  
37  
38 the study felt that wearing iThermonitor<sup>®</sup> was more or less comfortable and did not  
39  
40 affect daily activities. This work adds evidence to support the applicability of  
41  
42 iThermonitor<sup>®</sup> in surgical wards as a continuation or extension of intraoperative  
43  
44 temperature monitoring.  
45  
46  
47  
48  
49  
50  
51  
52  
53  
54

### 55 56 **Clinical implications**

57  
58 The advantages and feasibility of continuous vital sign monitoring in general wards  
59  
60

1  
2  
3  
4 are attracting increasing attention.<sup>10 26</sup> Regarding body temperature monitoring,  
5  
6 detecting the time to have fevers and the peak of fever are important for diagnoses  
7  
8 and clinical decision-making. Dakappa *et al.*<sup>11</sup> noted a higher peak temperature with a  
9  
10 significant difference of 1.52°C using a continuous tympanic temperature recording  
11  
12 device (TherCom<sup>®</sup>) than using mercury thermometers three times a day. Another  
13  
14 study reported that a wearable digital thermometer (TremTraq, with a battery life of  
15  
16 72 hours) detected increases in body temperature 180 min earlier than the standard  
17  
18 monitoring strategy.<sup>26</sup> As claimed in a previous study, iThermonitor<sup>®</sup> was marginally  
19  
20 superior in following the individual trends than in assessing absolute temperatures.<sup>13</sup>  
21  
22 The present study demonstrated that continuous temperature monitoring with  
23  
24 iThermonitor<sup>®</sup> was better at capturing the peak of fever, and could detect fever 4.35  
25  
26 hours earlier than intermittent temperature monitoring. These findings may have  
27  
28 important therapeutic implications. Furthermore, maintaining the continuity of body  
29  
30 temperature monitoring across different clinical scenarios helps to install a real-world  
31  
32 database of a patient's perioperative body temperature, which would provide more  
33  
34 information in exploring the regularity of perioperative temperature fluctuation.  
35  
36 Mercury-containing thermometers have been widely used for hundreds of years  
37  
38 because of their stable performance in reflecting temperature.<sup>27</sup> However, these  
39  
40 glass-based thermometers are fragile, and mercury, which is one of the top ten  
41  
42 chemicals of major public health concern, can leak.<sup>28</sup> Although the World Health  
43  
44 Organization has called for the phase out of mercury fever thermometers by 2020,<sup>28</sup>  
45  
46 they are still widely used in many countries.<sup>5 29 30</sup> Gaps are evident in practices on  
47  
48  
49  
50  
51  
52  
53  
54  
55  
56  
57  
58  
59  
60

1  
2  
3  
4 promoting mercury-free thermometers. The lack of an ideal alternative device for  
5  
6 temperature measurement is an important reason. Using iThermonitor® instead of  
7  
8 mercury thermometers to reduce medical mercury emissions is beneficial to patients,  
9  
10 health personnel and public health.<sup>29 30</sup>  
11  
12

### 13 14 **Limitations**

15  
16 There were several limitations in the present study. First, only axillary temperatures  
17  
18 were detected using iThermonitor® and mercury thermometers. Adding a set of core  
19  
20 body temperatures would help better understand the validity of the device for  
21  
22 monitoring body temperatures. Second, the validity of the device was not tested in the  
23  
24 ICU or in patients with compromised haemodynamic which might change skin  
25  
26 perfusion and temperature. Third, armpits were randomly selected for temperature  
27  
28 measurements, and the difference in armpit temperature between the dominant and  
29  
30 non-dominant arms, which might not exist,<sup>23</sup> was not taken into account. In addition,  
31  
32 an axillary temperature of 38°C was set as a fever reference in the present study.  
33  
34 However, the most convincing cut-off value remains unclear, due to varying  
35  
36 definitions of fever.<sup>7 31 32</sup>  
37  
38  
39  
40  
41  
42  
43  
44  
45

### 46 **CONCLUSIONS**

47  
48 iThermonitor® is a promising device for the continuous monitoring of  
49  
50 temperature in surgical patients. This device can improve fever detection by  
51  
52 dynamically reflecting the individual trends in body temperature throughout the whole  
53  
54 perioperative period. However, more algorithm training is still needed to improve the  
55  
56 accuracy of this device, especially when it is used in hypothermia or fever patients,  
57  
58  
59  
60

1  
2  
3  
4 female patients, or underweight or even normal-weight patients.  
5  
6  
7

8 **Contributors:** Yuwei Liu participated in the conception, statistical analysis, and manuscript draft  
9 preparation. Changqing Liu was in charge of body temperature management in the OR and PACU.  
10 Min Gao and Yan Wang performed the temperature measurements. Yangjing Bai participated in  
11 the design of the study. Ruihua Xu administered the project. Renrong Gong conceived, designed  
12 and managed the running of the study, interpreted the data, and revised and finally approved the  
13 manuscript. All authors read and approved the manuscript.  
14  
15  
16  
17  
18

19 **Funding:** This study was funded by the Sichuan University West China Nursing Discipline  
20 Development Special Fund Project (No.HXHL19031).  
21  
22

23 **Competing interest:** None declared.  
24

25 **Ethics approval:** Ethical approval was obtained from the Biomedical Research Ethics Committee  
26 of West China Hospital of Sichuan University on July 4, 2019 (No. 2019-447).  
27  
28

29 **Clinical trial registration:** The study was registered at the Chinese Clinical Trail Registry  
30 (ChiCTR1900024549) on July 5, 2019. The full study protocol can be accessed  
31 at [www.chictr.org.cn](http://www.chictr.org.cn).  
32  
33

34 **Data sharing statement:** Data are available upon reasonable request.  
35

36 **Open access:** This is an open access article distributed in accordance with the Creative Commons  
37 Attribution Non Commercial (CC BY-NC4.0) license, which permits others to distribute, remix,  
38 adapt, build upon this work non-commercially, and license their derivative works on different  
39 terms, provided the original work is properly cited, appropriate credit is given, any changes made  
40 indicated, and the use is non-commercial. See: <http://creativecommons.org/licenses/by-nc/4.0/>  
41  
42  
43  
44  
45  
46  
47  
48

## 49 REFERENCES

- 50 1. Sessler DI. Opioids and postoperative shivering. *J Clin Anesth* 2016;31:42-43.
- 51 2. Middleton S, McElduff P, Drury P, et al. Vital sign monitoring following stroke associated  
52 with 90-day independence: A secondary analysis of the QASC cluster randomized trial. *Int*  
53 *J Nurs Stud* 2019;89:72-79.
- 54 3. Larach MG, Brandom BW, Allen GC, et al. Malignant Hyperthermia Deaths Related to  
55 Inadequate Temperature Monitoring, 2007–2012. *Anesthesia & Analgesia*  
56 2014;119(6):1359-66.
- 57 4. Sollai S, Dani C, Berti E, et al. Performance of a non-contact infrared thermometer in  
58  
59  
60

- 1  
2  
3 healthy newborns. *BMJ Open* 2016;6(3):e008695.
- 4  
5 5. Halder N, Peshin SS, Pandey RM, et al. Awareness assessment of harmful effects of  
6 mercury in a health care set-up in India: A survey-based study. *Toxicol Ind Health*  
7 2015;31(12):1144-51.
- 8  
9 6. Opersteny E, Anderson H, Bates J, et al. Precision, Sensitivity and Patient Preference of  
10 Non-Invasive Thermometers in a Pediatric Surgical Acute Care Setting. *J Pediatr Nurs*  
11 2017;35:36-41.
- 12  
13 7. Niven DJ, Gaudet JE, Laupland KB, et al. Accuracy of Peripheral Thermometers for  
14 Estimating Temperature. *Annals of Internal Medicine* 2015;163(10)
- 15  
16 8. Geijer H, Udumyan R, Lohse G, et al. Temperature measurements with a temporal scanner:  
17 systematic review and meta-analysis. *BMJ Open* 2016;6(3):e009509.
- 18  
19 9. Calonder EM, Sendelbach S, Hodges JS, et al. Temperature Measurement in Patients  
20 Undergoing Colorectal Surgery and Gynecology Surgery: A Comparison of Esophageal  
21 Core, Temporal Artery, and Oral Methods. *Journal of PeriAnesthesia Nursing*  
22 2010;25(2):71-78.
- 23  
24 10. Downey CL, Chapman S, Randell R, et al. The impact of continuous versus intermittent  
25 vital signs monitoring in hospitals: A systematic review and narrative synthesis. *Int J Nurs*  
26 *Stud* 2018;84:19-27.
- 27  
28 11. Dakappa PH, Bhat GK, Bolumbu G, et al. Comparison of Conventional Mercury  
29 Thermometer and Continuous TherCom((R)) Temperature Recording in Hospitalized  
30 Patients. *J Clin Diagn Res* 2016;10(9):OC43-OC46.
- 31  
32 12. Liao Y, Thompson C, Peterson S, et al. The Future of Wearable Technologies and Remote  
33 Monitoring in Health Care. *Am Soc Clin Oncol Educ Book* 2019;39:115-21.
- 34  
35 13. Zsuzsanna Balla H, Theodorsson E, Strom JO. Evaluation of commercial, wireless dermal  
36 thermometers for surrogate measurements of core temperature. *Scand J Clin Lab Invest*  
37 2019;79(1-2):1-6.
- 38  
39 14. Muzny M, Henriksen A, Giordanengo A, et al. Wearable sensors with possibilities for  
40 data exchange: Analyzing status and needs of different actors in mobile health monitoring  
41 systems. *Int J Med Inform* 2020;133:104017.
- 42  
43 15. Breteler MJMM, Huizinga E, van Loon K, et al. Reliability of wireless monitoring using a  
44 wearable patch sensor in high-risk surgical patients at a step-down unit in the Netherlands:  
45 a clinical validation study. *BMJ Open* 2018;8(2):e020162.
- 46  
47 16. Izmailova ES, McLean IL, Bhatia G, et al. Evaluation of Wearable Digital Devices in a  
48 Phase I Clinical Trial. *Clin Transl Sci* 2019;12(3):247-56.
- 49  
50 17. Downey C, Ng S, Jayne D, et al. Reliability of a wearable wireless patch for continuous  
51 remote monitoring of vital signs in patients recovering from major surgery: a clinical  
52 validation study from the TRaCINg trial. *BMJ Open* 2019;9(8):e031150.
- 53  
54 18. Pei L, Huang Y, Mao G, et al. Axillary Temperature, as Recorded by the iThermonitor  
55 WT701, Well Represents Core Temperature in Adults Having Noncardiac Surgery. *Anesth*  
56 *Analg* 2018;126(3):833-38.
- 57  
58 19. Lu SH, Dai YT, Yen CJ. The effects of measurement site and ambient temperature on  
59 body temperature values in healthy older adults: a cross-sectional comparative study. *Int J*  
60 *Nurs Stud* 2009;46(11):1415-22.
20. Marcy SM, Kohl KS, Dagan R, et al. Fever as an adverse event following immunization:



- 1  
2  
3 case definition and guidelines of data collection, analysis, and presentation. *Vaccine*  
4 2004;22(5-6):551-56.  
5  
6 21. Bland JM, Altman DG. Agreement between methods of measurement with multiple  
7 observations per individual. *Journal of biopharmaceutical statistics* 2007;17(4):571-82.  
8  
9 22. Zou GY. Confidence interval estimation for the Bland-Altman limits of agreement with  
10 multiple observations per individual. *Statistical methods in medical research*  
11 2013;22(6):630-42.  
12  
13 23. Rubia-Rubia J, Arias A, Sierra A, et al. Measurement of body temperature in adult  
14 patients: comparative study of accuracy, reliability and validity of different devices. *Int J*  
15 *Nurs Stud* 2011;48(7):872-80.  
16  
17 24. Lu SH, Dai YT. Normal body temperature and the effects of age, sex, ambient  
18 temperature and body mass index on normal oral temperature: a prospective, comparative  
19 study. *Int J Nurs Stud* 2009;46(5):661-8.  
20  
21 25. Kakarmath SS, de Redon E, Centi AJ, et al. Assessing the Usability of an Automated  
22 Continuous Temperature Monitoring Device (iThermonitor) in Pediatric Patients:  
23 Non-Randomized Pilot Study. *JMIR Pediatr Parent* 2018;1(2):e10804.  
24  
25 26. Abbasi J. Wearable Digital Thermometer Improves Fever Detection. *JAMA*  
26 2017;318(6):510.  
27  
28 27. Wright WF, Mackowiak PA. Origin, Evolution and Clinical Application of the  
29 Thermometer. *Am J Med Sci* 2016;351(5):526-34.  
30  
31 28. WHO. WHO calls for the phase out of mercury fever thermometers and blood pressure  
32 measuring devices by 2020. Available at:  
33 [https://www.who.int/news-room/detail/11-10-2013-who-calls-for-the-phase-out-of-mercur](https://www.who.int/news-room/detail/11-10-2013-who-calls-for-the-phase-out-of-mercury-fever-thermometers-and-blood-pressure-measuring-devices-by-2020)  
34 [y-fever-thermometers-and-blood-pressure-measuring-devices-by-2020](https://www.who.int/news-room/detail/11-10-2013-who-calls-for-the-phase-out-of-mercury-fever-thermometers-and-blood-pressure-measuring-devices-by-2020) [accessed 11  
35 October 2013].  
36  
37 29. Li P, Yang Y, Xiong W. Impacts of Mercury Pollution Controls on Atmospheric Mercury  
38 Concentration and Occupational Mercury Exposure in a Hospital. *Biol Trace Elem Res*  
39 2015;168(2):330-4.  
40  
41 30. Chadli-Debbiche A, Allani R, Jouini R, et al. Mercurial hospital waste: management,  
42 becoming and recommendations. *Tunis Med* 2018;96(5):273-80.  
43  
44 31. Apa H, Gozmen S, Bayram N, et al. Clinical accuracy of tympanic thermometer and  
45 noncontact infrared skin thermometer in pediatric practice: an alternative for axillary  
46 digital thermometer. *Pediatr Emerg Care* 2013;29(9):992-7.  
47  
48 32. Wright WF, Auwaerter PG. Fever and Fever of Unknown Origin: Review, Recent  
49 Advances, and Lingering Dogma. *Open Forum Infect Dis* 2020;7(5):ofaa132.  
50  
51  
52  
53  
54  
55  
56  
57  
58  
59  
60

1  
2  
3 **Figure 1** The position of the iThermonitor<sup>®</sup> sensor in the axilla.  
4  
5  
6

7 **Figure 2** Repeated-measures Bland-Altman plot of iThermonitor<sup>®</sup> axillary temperatures  
8 against mercury thermometer temperatures. ICC=0.753, 95% LoA were from -0.63°C to  
9 0.73°C. A total of 5.11% of the points were outside the 95% LoA.  
10  
11  
12

13  
14 **Figure 3** Peak temperatures recorded with iThermonitor<sup>®</sup> and the mercury thermometers.  
15  
16  
17  
18  
19  
20  
21  
22  
23  
24  
25  
26  
27  
28  
29  
30  
31  
32  
33  
34  
35  
36  
37  
38  
39  
40  
41  
42  
43  
44  
45  
46  
47  
48  
49  
50  
51  
52  
53  
54  
55  
56  
57  
58  
59  
60

For peer review only

1  
2  
3  
4  
5  
6  
7  
8  
9  
10  
11  
12  
13  
14  
15  
16  
17  
18  
19  
20  
21  
22  
23  
24  
25  
26  
27  
28  
29  
30  
31  
32  
33  
34  
35  
36  
37  
38  
39  
40  
41  
42  
43  
44  
45  
46  
47  
48  
49  
50  
51  
52  
53  
54  
55  
56  
57  
58  
59  
60

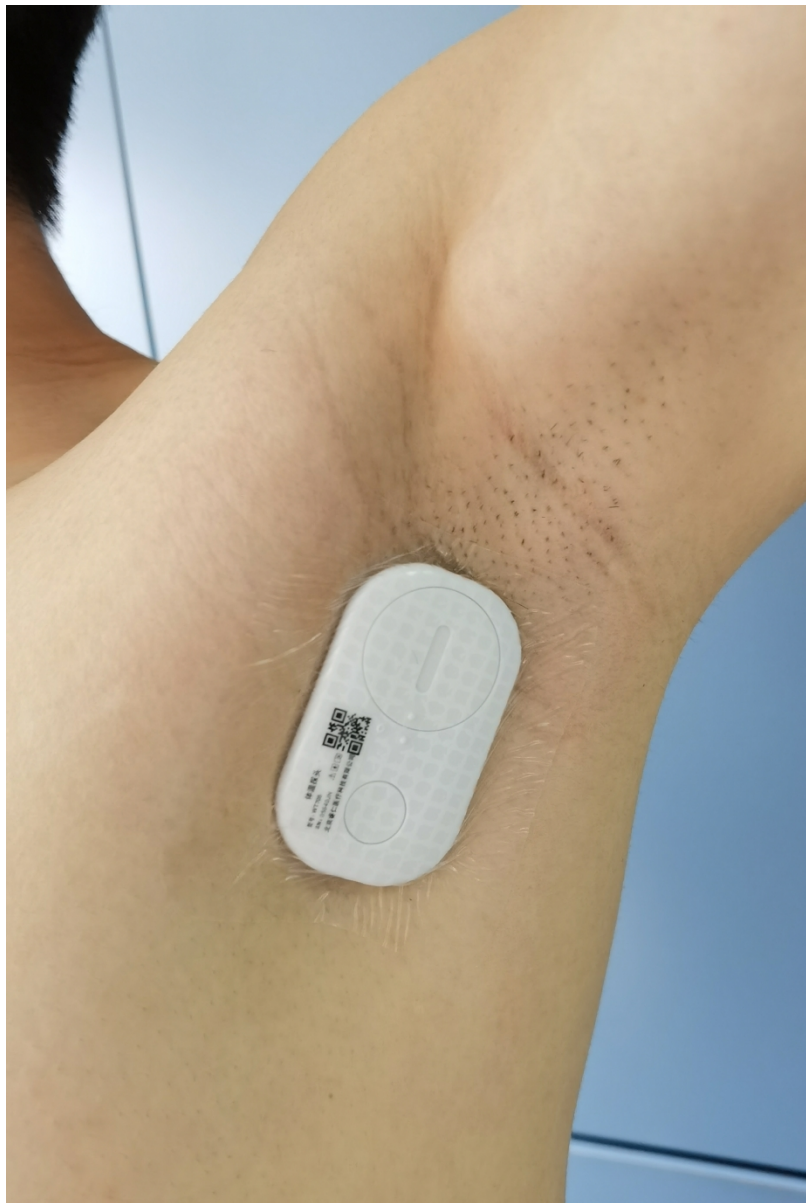

The position of the iThermonitor® sensor in the axilla.

914x1354mm (72 x 72 DPI)

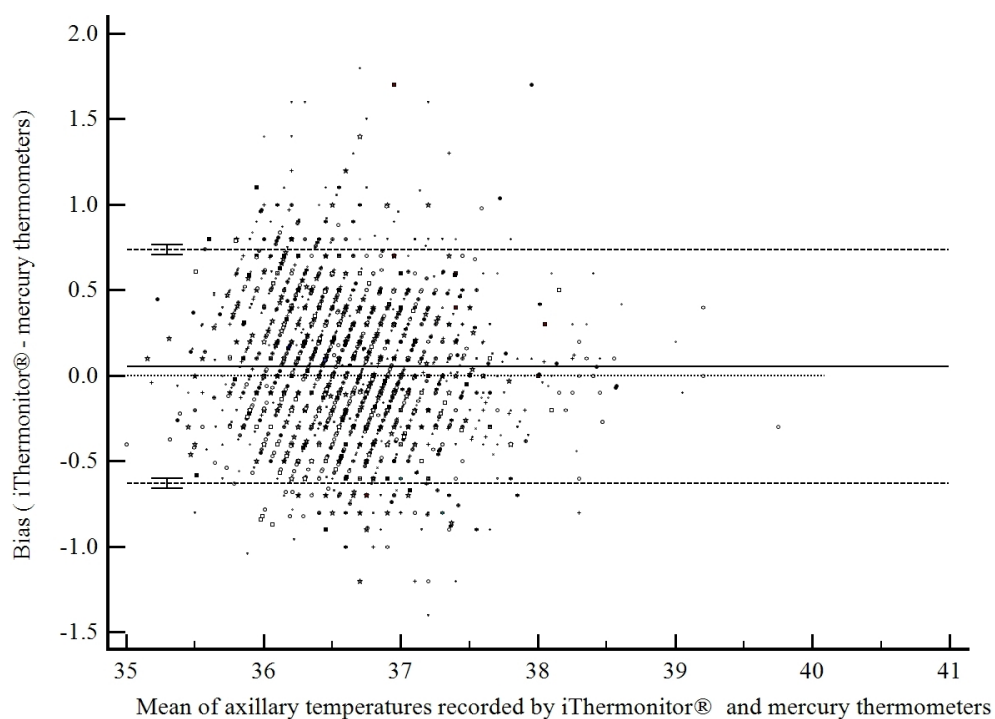

Repeated-measures Bland-Altman plot of iThermonitor® axillary temperatures against mercury thermometer temperatures. ICC=0.753, 95% LoA were from -0.63°C to 0.73°C. A total of 5.11% of the points were outside the 95% LoA.

101x76mm (300 x 300 DPI)

1  
2  
3  
4  
5  
6  
7  
8  
9  
10  
11  
12  
13  
14  
15  
16  
17  
18  
19  
20  
21  
22  
23  
24  
25  
26  
27  
28  
29  
30  
31  
32  
33  
34  
35  
36  
37  
38  
39  
40  
41  
42  
43  
44  
45  
46  
47  
48  
49  
50  
51  
52  
53  
54  
55  
56  
57  
58  
59  
60



Peak temperatures recorded with iThermonitor® and the mercury thermometers.  
101x76mm (300 x 300 DPI)

Supplementary Materials

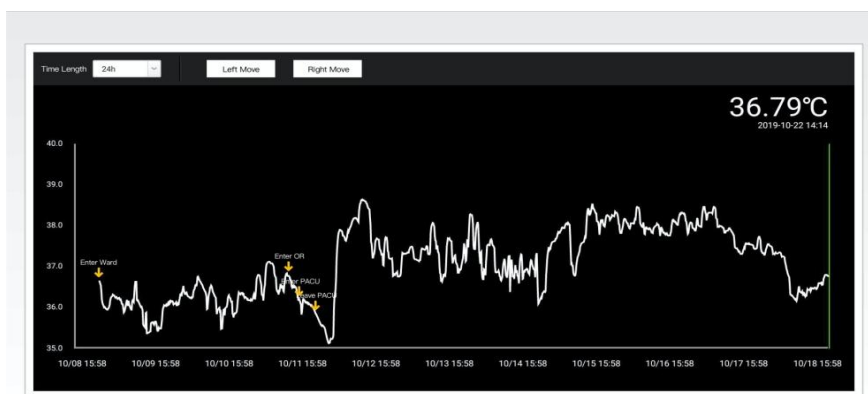

Appendix figure 1 The temperature curve with time stamps across different clinical scenarios.

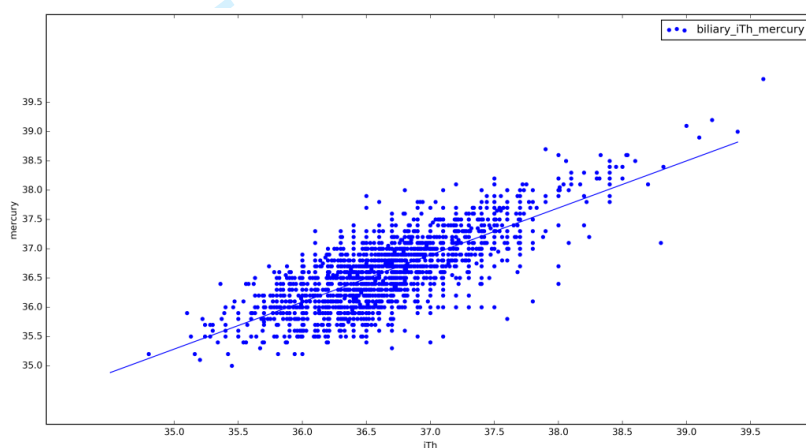

Appendix figure 2 Scatter plot of iThermometer® axillary temperatures (x-axis) against mercury thermometer temperatures (y-axis). Pearson's correlation coefficient  $r=0.755$ ,  $P<0.001$ .

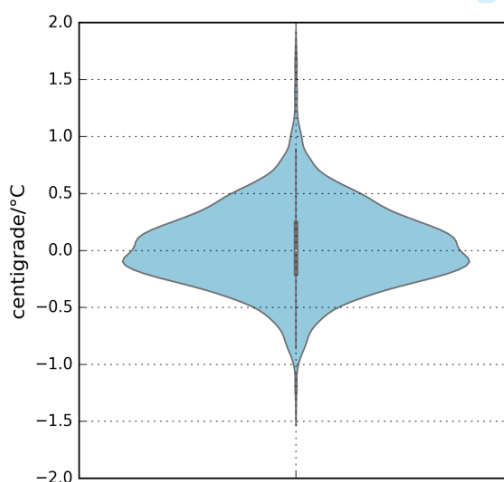

Appendix figure 3 Distribution of the difference of axillary temperatures, calculated by iThermometer® minus mercury thermometer.

**Appendix table 1** The questionnaire to evaluate the feasibility of the iThermonitor<sup>®</sup>  
(N=109)

| Selections                                               | Score | Patients` Options (%) |
|----------------------------------------------------------|-------|-----------------------|
| I felt very uncomfortable and could not bear to wear it. | 1     | 0 (0)                 |
| I felt slight discomfort, but it's tolerable.            | 2     | 21 (19.3)             |
| I didn't have noticeable feelings of wearing it.         | 3     | 81 (74.3)             |
| I felt comfortable with it.                              | 4     | 6 (5.5)               |
| I felt very comfortable with it.                         | 5     | 1 (0.9)               |

| Section & Topic          | No  | Item                                                                                                                                                   | Reported on page # |
|--------------------------|-----|--------------------------------------------------------------------------------------------------------------------------------------------------------|--------------------|
| <b>TITLE OR ABSTRACT</b> |     |                                                                                                                                                        |                    |
|                          | 1   | Identification as a study of diagnostic accuracy using at least one measure of accuracy (such as sensitivity, specificity, predictive values, or AUC)  | Page 2             |
| <b>ABSTRACT</b>          |     |                                                                                                                                                        |                    |
|                          | 2   | Structured summary of study design, methods, results, and conclusions (for specific guidance, see STARD for Abstracts)                                 | Page 2-3           |
| <b>INTRODUCTION</b>      |     |                                                                                                                                                        |                    |
|                          | 3   | Scientific and clinical background, including the intended use and clinical role of the index test                                                     | Page 4-5           |
|                          | 4   | Study objectives and hypotheses                                                                                                                        | Page 6             |
| <b>METHODS</b>           |     |                                                                                                                                                        |                    |
| <i>Study design</i>      | 5   | Whether data collection was planned before the index test and reference standard were performed (prospective study) or after (retrospective study)     | Page 6             |
| <i>Participants</i>      | 6   | Eligibility criteria                                                                                                                                   | Page 6             |
|                          | 7   | On what basis potentially eligible participants were identified (such as symptoms, results from previous tests, inclusion in registry)                 | Page 6             |
|                          | 8   | Where and when potentially eligible participants were identified (setting, location and dates)                                                         | Page 6             |
|                          | 9   | Whether participants formed a consecutive, random or convenience series                                                                                | Page 6             |
| <i>Test methods</i>      | 10a | Index test, in sufficient detail to allow replication                                                                                                  | Page 7-8           |
|                          | 10b | Reference standard, in sufficient detail to allow replication                                                                                          | Page 7-8           |
|                          | 11  | Rationale for choosing the reference standard (if alternatives exist)                                                                                  | Page 8             |
|                          | 12a | Definition of and rationale for test positivity cut-offs or result categories of the index test, distinguishing pre-specified from exploratory         | Page 9             |
|                          | 12b | Definition of and rationale for test positivity cut-offs or result categories of the reference standard, distinguishing pre-specified from exploratory | Page 9             |
|                          | 13a | Whether clinical information and reference standard results were available to the performers/readers of the index test                                 | Page 8             |
|                          | 13b | Whether clinical information and index test results were available to the assessors of the reference standard                                          | Page 8             |
| <i>Analysis</i>          | 14  | Methods for estimating or comparing measures of diagnostic accuracy                                                                                    | Page 10            |
|                          | 15  | How indeterminate index test or reference standard results were handled                                                                                | Page 10            |
|                          | 16  | How missing data on the index test and reference standard were handled                                                                                 | Page 11            |
|                          | 17  | Any analyses of variability in diagnostic accuracy, distinguishing pre-specified from exploratory                                                      | Page 15            |
|                          | 18  | Intended sample size and how it was determined                                                                                                         | Page 10            |
| <b>RESULTS</b>           |     |                                                                                                                                                        |                    |
| <i>Participants</i>      | 19  | Flow of participants, using a diagram                                                                                                                  | Page 11            |
|                          | 20  | Baseline demographic and clinical characteristics of participants                                                                                      | Page 11-12         |
|                          | 21a | Distribution of severity of disease in those with the target condition                                                                                 | Page 15            |
|                          | 21b | Distribution of alternative diagnoses in those without the target condition                                                                            | Page 15            |
|                          | 22  | Time interval and any clinical interventions between index test and reference standard                                                                 | Page 11            |
| <i>Test results</i>      | 23  | Cross tabulation of the index test results (or their distribution) by the results of the reference standard                                            | Page 16            |
|                          | 24  | Estimates of diagnostic accuracy and their precision (such as 95% confidence intervals)                                                                | Page 16            |
|                          | 25  | Any adverse events from performing the index test or the reference standard                                                                            | Page 17            |
| <b>DISCUSSION</b>        |     |                                                                                                                                                        |                    |
|                          | 26  | Study limitations, including sources of potential bias, statistical uncertainty, and generalisability                                                  | Page 21            |
|                          | 27  | Implications for practice, including the intended use and clinical role of the index test                                                              | Page 19            |
| <b>OTHER INFORMATION</b> |     |                                                                                                                                                        |                    |
|                          | 28  | Registration number and name of registry                                                                                                               | Page 22            |
|                          | 29  | Where the full study protocol can be accessed                                                                                                          | Page 22            |
|                          | 30  | Sources of funding and other support; role of funders                                                                                                  | Page 22            |



# STARD 2015

---

## AIM

STARD stands for “Standards for Reporting Diagnostic accuracy studies”. This list of items was developed to contribute to the completeness and transparency of reporting of diagnostic accuracy studies. Authors can use the list to write informative study reports. Editors and peer-reviewers can use it to evaluate whether the information has been included in manuscripts submitted for publication.

---

## EXPLANATION

A **diagnostic accuracy study** evaluates the ability of one or more medical tests to correctly classify study participants as having **atarget condition**. This can be a disease, a disease stage, response or benefit from therapy, or an event or condition in the future. A medical test can be an imaging procedure, a laboratory test, elements from history and physical examination, a combination of these, or any other method for collecting information about the current health status of a patient.

The test whose accuracy is evaluated is called **index test**. A study can evaluate the accuracy of one or more index tests. Evaluating the ability of a medical test to correctly classify patients is typically done by comparing the distribution of the index test results with those of the **reference standard**. The reference standard is the best available method for establishing the presence or absence of the target condition. An accuracy study can rely on one or more reference standards.

If test results are categorized as either positive or negative, the cross tabulation of the index test results against those of the reference standard can be used to estimate the **sensitivity** of the index test (the proportion of participants *with* the target condition who have a positive index test), and its **specificity** (the proportion *without* the target condition who have a negative index test). From this cross tabulation (sometimes referred to as the contingency or “2x2” table), several other accuracy statistics can be estimated, such as the positive and negative **predictive values** of the test. Confidence intervals around estimates of accuracy can then be calculated to quantify the statistical **precision** of the measurements.

If the index test results can take more than two values, categorization of test results as positive or negative requires a **test positivity cut-off**. When multiple such cut-offs can be defined, authors can report a receiver operating characteristic (ROC) curve which graphically represents the combination of sensitivity and specificity for each possible test positivity cut-off. The **area under the ROC curve** informs in a single numerical value about the overall diagnostic accuracy of the index test.

The **intended use** of a medical test can be diagnosis, screening, staging, monitoring, surveillance, prediction or prognosis. The **clinical role** of a test explains its position relative to existing tests in the clinical pathway. A replacement test, for example, replaces an existing test. A triage test is used before an existing test; an add-on test is used after an existing test.

Besides diagnostic accuracy, several other outcomes and statistics may be relevant in the evaluation of medical tests. Medical tests can also be used to classify patients for purposes other than diagnosis, such as staging or prognosis. The STARD list was not explicitly developed for these other outcomes, statistics, and study types, although most STARD items would still apply.

---

## DEVELOPMENT

This STARD list was released in 2015. The 30 items were identified by an international expert group of methodologists, researchers, and editors. The guiding principle in the development of STARD was to select items that, when reported, would help readers to judge the potential for bias in the study, to appraise the applicability of the study findings and the validity of conclusions and recommendations. The list represents an update of the first version, which was published in 2003.

More information can be found on <http://www.equator-network.org/reporting-guidelines/stard>.

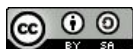

Supplement: bmjopen-2020-039474.draft_revisions.pdf [file bmjopen-2020-039474.draft_revisions.pdf]
