# Supplementary material for: Evaluation of a wearable wireless device with artificial intelligence, iThermonitor WT705, for continuous temperature monitoring for patients in surgical wards: a prospective comparative study
Source: PubMed Central journal article supplement — BMJ Open. 2020 Nov 18;10(11):e039474. doi: 10.1136/bmjopen-2020-039474 (PMC7677341; doi:10.1136/bmjopen-2020-039474), 2020-11-18
Supplement: bmjopen-2020-039474supp001.pdf [file bmjopen-2020-039474supp001.pdf]

## Supplementary Materials

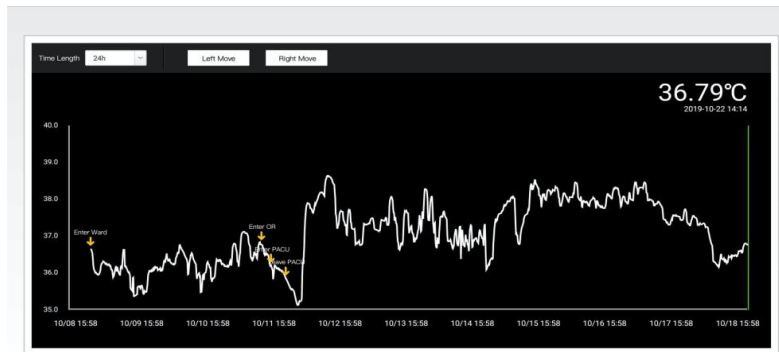

**Appendix figure 1** The temperature curve with time stamps across different clinical scenarios.

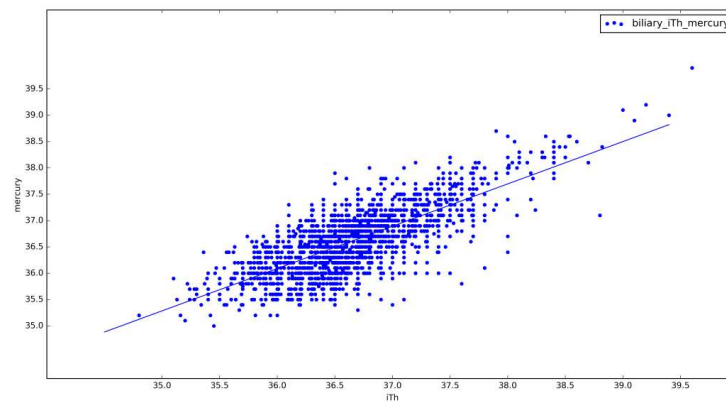

**Appendix figure 2** Scatter plot of iThermometer<sup>®</sup> axillary temperatures (x-axis) against mercury thermometer temperatures (y-axis). Pearson's correlation coefficient  $r=0.755$ ,  $P<0.001$ .

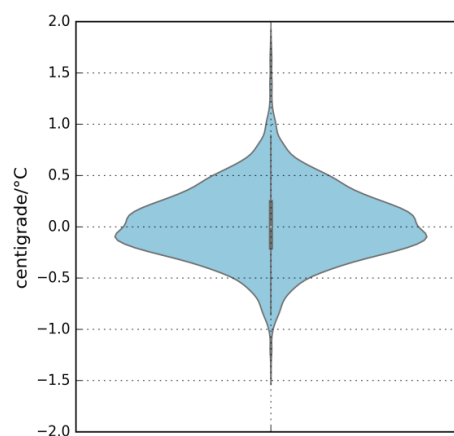

**Appendix figure 3** Distribution of the difference of axillary temperatures, calculated by iThermometer<sup>®</sup> minus mercury thermometer.

**Appendix table 1** The questionnaire to evaluate the feasibility of the iThermonitor®  
(N=109)

| Selections                                               | Score | Patients` Options (%) |
|----------------------------------------------------------|-------|-----------------------|
| I felt very uncomfortable and could not bear to wear it. | 1     | 0 (0)                 |
| I felt slight discomfort, but it's tolerable.            | 2     | 21 (19.3)             |
| I didn't have noticeable feelings of wearing it.         | 3     | 81 (74.3)             |
| I felt comfortable with it.                              | 4     | 6 (5.5)               |
| I felt very comfortable with it.                         | 5     | 1 (0.9)               |
